# Supplementary material for: Impella versus VA-ECMO for the treatment of patients with cardiogenic shock: the Impella Network Project – observational study protocol for cost-effectiveness and budget impact analyses
Source: PubMed Central journal article supplement — BMJ Open. 2024 Jun 26;14(6):e078358. doi: 10.1136/bmjopen-2023-078358 (PMC11216050; doi:10.1136/bmjopen-2023-078358), 2024-06-26
Supplement: bmjopen-2023-078358.draft_revisions.pdf [file bmjopen-2023-078358.draft_revisions.pdf]

# BMJ Open

BMJ Open is committed to open peer review. As part of this commitment we make the peer review history of every article we publish publicly available.

When an article is published we post the peer reviewers' comments and the authors' responses online. We also post the versions of the paper that were used during peer review. These are the versions that the peer review comments apply to.

The versions of the paper that follow are the versions that were submitted during the peer review process. They are not the versions of record or the final published versions. They should not be cited or distributed as the published version of this manuscript.

BMJ Open is an open access journal and the full, final, typeset and author-corrected version of record of the manuscript is available on our site with no access controls, subscription charges or pay-per-view fees (<http://bmjopen.bmj.com>).

If you have any questions on BMJ Open's open peer review process please email [info.bmjopen@bmj.com](mailto:info.bmjopen@bmj.com)

# BMJ Open

## Impella vs. VA-ECMO for the treatment of Patients with Cardiogenic Shock. The Impella Network project: Observational Study Protocol for Cost-effectiveness and Budget Impact Analyses

|                               |                                                                                                                                                                                                                                                                                                                                                                                                                                                                                                                                                                                                                                                                                                                                                                                                                                                                                                                                                                                                                                                                                                                                                                                                                                                                                                                                                                                                                                                                                                                                                                                                                                                                                                                                                                                                                                                                                                                                                                                                                                                                                                                                                                                                                                                                                                                                                                                              |
|-------------------------------|----------------------------------------------------------------------------------------------------------------------------------------------------------------------------------------------------------------------------------------------------------------------------------------------------------------------------------------------------------------------------------------------------------------------------------------------------------------------------------------------------------------------------------------------------------------------------------------------------------------------------------------------------------------------------------------------------------------------------------------------------------------------------------------------------------------------------------------------------------------------------------------------------------------------------------------------------------------------------------------------------------------------------------------------------------------------------------------------------------------------------------------------------------------------------------------------------------------------------------------------------------------------------------------------------------------------------------------------------------------------------------------------------------------------------------------------------------------------------------------------------------------------------------------------------------------------------------------------------------------------------------------------------------------------------------------------------------------------------------------------------------------------------------------------------------------------------------------------------------------------------------------------------------------------------------------------------------------------------------------------------------------------------------------------------------------------------------------------------------------------------------------------------------------------------------------------------------------------------------------------------------------------------------------------------------------------------------------------------------------------------------------------|
| Journal:                      | <i>BMJ Open</i>                                                                                                                                                                                                                                                                                                                                                                                                                                                                                                                                                                                                                                                                                                                                                                                                                                                                                                                                                                                                                                                                                                                                                                                                                                                                                                                                                                                                                                                                                                                                                                                                                                                                                                                                                                                                                                                                                                                                                                                                                                                                                                                                                                                                                                                                                                                                                                              |
| Manuscript ID                 | bmjopen-2023-078358                                                                                                                                                                                                                                                                                                                                                                                                                                                                                                                                                                                                                                                                                                                                                                                                                                                                                                                                                                                                                                                                                                                                                                                                                                                                                                                                                                                                                                                                                                                                                                                                                                                                                                                                                                                                                                                                                                                                                                                                                                                                                                                                                                                                                                                                                                                                                                          |
| Article Type:                 | Protocol                                                                                                                                                                                                                                                                                                                                                                                                                                                                                                                                                                                                                                                                                                                                                                                                                                                                                                                                                                                                                                                                                                                                                                                                                                                                                                                                                                                                                                                                                                                                                                                                                                                                                                                                                                                                                                                                                                                                                                                                                                                                                                                                                                                                                                                                                                                                                                                     |
| Date Submitted by the Author: | 31-Jul-2023                                                                                                                                                                                                                                                                                                                                                                                                                                                                                                                                                                                                                                                                                                                                                                                                                                                                                                                                                                                                                                                                                                                                                                                                                                                                                                                                                                                                                                                                                                                                                                                                                                                                                                                                                                                                                                                                                                                                                                                                                                                                                                                                                                                                                                                                                                                                                                                  |
| Complete List of Authors:     | <p>ARDITO, VITTORIA; SDA Bocconi School of Management<br/>         ROGNONI, CARLA; SDA Bocconi School of Management<br/>         Pieri, Marina; Istituto di Ricovero e Cura a Carattere Scientifico Ospedale San Raffaele, Department of Anesthesia and Intensive Care; Vita-Salute San Raffaele University<br/>         Barbone, Alessandro; IRCCS Humanitas Research Hospital Briguori, Carlo; Clinica Mediterranea SpA, Mediterranea Cardiocentro Cigala, Emanuele; Ospedale Monaldi, UOC Cardiologia Interventistica Gerosa, Gino; Università degli Studi di Padova, Department of Cardiac, Thoracic, Vascular Sciences and Public Health<br/>         Iannaccone, Mario; ASL Città di Torino, Division of Cardiology, San Giovanni Bosco Hospital<br/>         Loforte, Antonio; Azienda Ospedaliero Universitaria Città della Salute e della Scienza di Torino, Dipartimento di Scienze Chirurgiche<br/>         Marini, Marco; Azienda Ospedaliero Universitaria delle Marche, Dipartimento di Scienze Cardiovascolari<br/>         Montalto, Andrea; Azienda Ospedaliera di Caserta Sant'Anna e San Sebastiano<br/>         Oreglia, Jacopo; Niguarda Hospital<br/>         Pacini, Davide ; University of Bologna,<br/>         Pennacchi, Mauro; Azienda Ospedaliera San Camillo Forlanini, Dipartimento Cardio Toraco Vascolare, U.O. Cardiologia Interventistica Pestrighella, Vincenzo; Ospedale Mater Dei, Division of Cardiology Porto, Italo; Ospedale Policlinico San Martino Istituto di Ricovero e Cura a Carattere Scientifico per l'Oncologia, DICATOV-CardioThoracic and Vascular; Università degli Studi di Genova Scuola di Scienze Mediche e Farmaceutiche, University of Genova, Policlinico San Martino IRCCS Stefano, Pierluigi; Azienda Ospedaliero Universitaria Careggi<br/>         Tarantini, Giuseppe; Università degli Studi di Padova, Department of Cardiac, Thoracic, Vascular Sciences and Public Health<br/>         Valente, Serafina; Azienda Ospedaliera Universitaria Senese<br/>         Vandoni, Pietro; Fondazione IRCCS San Gerardo dei Tintori<br/>         Tarricone, Rosanna; Bocconi University, Department of Social and Political Science; SDA Bocconi School of Management<br/>         Scandroglio, Anna; Istituto di Ricovero e Cura a Carattere Scientifico Ospedale San Raffaele, Department of Anesthesia and Intensive Care</p> |
| Keywords:                     | CARDIOLOGY, HEALTH ECONOMICS, Observational Study                                                                                                                                                                                                                                                                                                                                                                                                                                                                                                                                                                                                                                                                                                                                                                                                                                                                                                                                                                                                                                                                                                                                                                                                                                                                                                                                                                                                                                                                                                                                                                                                                                                                                                                                                                                                                                                                                                                                                                                                                                                                                                                                                                                                                                                                                                                                            |

1  
2  
3  
4  
5  
6  
7  
8  
9  
10  
11  
12  
13  
14  
15  
16  
17  
18  
19  
20  
21  
22  
23  
24  
25  
26  
27  
28  
29  
30  
31  
32  
33  
34  
35  
36  
37  
38  
39  
40  
41  
42  
43  
44  
45  
46  
47  
48  
49  
50  
51  
52  
53  
54  
55  
56  
57  
58  
59  
60

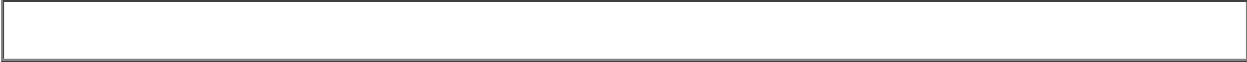

SCHOLARONE™  
Manuscripts

# Impella vs. VA-ECMO for the treatment of Patients with Cardiogenic Shock. The Impella Network project: Observational Study Protocol for Cost-effectiveness and Budget Impact Analyses

## Authors:

Vittoria Ardito<sup>1</sup>, Carla Rognoni<sup>1,\*</sup>, Marina Pieri<sup>2,3</sup>, Alessandro Barbone<sup>4</sup>, Carlo Briguori<sup>5</sup>, Emanuele Cigala<sup>6</sup>, Gino Gerosa<sup>7</sup>, Mario Iannaccone<sup>8</sup>, Antonio Loforte<sup>9</sup>, Marco Marini<sup>10</sup>, Andrea Montalto<sup>11</sup>, Jacopo Oreglia<sup>12</sup>, Davide Pacini<sup>13</sup>, Mauro Pennacchi<sup>14</sup>, Vincenzo Pestrinchella<sup>15</sup>, Italo Porto<sup>16,17</sup>, Pierluigi Stefano<sup>18</sup>, Giuseppe Tarantini<sup>7</sup>, Serafina Valente<sup>19</sup>, Pietro Vandoni<sup>20</sup>, Rosanna Tarricone<sup>1,21</sup> and Anna Mara Scandroglio<sup>2</sup>

## Affiliations:

<sup>1</sup> Centre for Research on Health and Social Care Management (CERGAS), SDA Bocconi School of Management, Milan, Italy

<sup>2</sup> Department of Anesthesia and Intensive Care, IRCCS San Raffaele Scientific Institute, Milan, Italy

<sup>3</sup> Vita Salute San Raffaele University, Milan, Italy

<sup>4</sup> IRCCS Humanitas Research Hospital, Milan, Italy

<sup>5</sup> Mediterranea Cardiocentro, Napoli, Italy

<sup>6</sup> UOC Cardiologia Interventistica, Ospedale Monaldi, Azienda dei Colli, Napoli, Italy

<sup>7</sup> Department of Cardiac, Thoracic, Vascular Sciences and Public Health, University of Padua Medical School, Padua, Italy

<sup>8</sup> Division of Cardiology, San Giovanni Bosco Hospital, ASL Città di Torino, Turin, Italy

<sup>9</sup> AOU Città della Salute e della Scienza, Dipartimento di Scienze Chirurgiche, Università di Torino, Torino, Italy

<sup>10</sup> Azienda Ospedaliero-Universitaria delle Marche, Dipartimento di Scienze Cardiovascolari, Ancona, Italy

<sup>11</sup> Ospedale di Caserta, Caserta, Italy

<sup>12</sup> Niguarda Hospital, Milano, Italy

<sup>13</sup> Ospedale S. Orsola, Bologna, Italy

<sup>14</sup> Dipartimento Cardio Toraco Vascolare, U.O. Cardiologia Interventistica, Azienda Ospedaliera San Camillo - Forlanini, Roma, Italy

<sup>15</sup> Division of Cardiology, Mater Dei Hospital, Bari, Italy

<sup>16</sup> Cardiothoracic and Vascular Department (DICATOV), IRCCS Ospedale Policlinico San Martino, Genoa, Italy;

<sup>17</sup> Department of Internal Medicine and Medical Specialties (DIMI), University of Genoa, Genoa, Italy

<sup>18</sup> Ospedale Careggi, Firenze, Italy<sup>19</sup> Azienda Ospedaliera-Universitaria Siena, Italy

<sup>20</sup> Fondazione IRCCS San Gerardo dei Tintori, Monza, Italy

<sup>21</sup> Department of Social and Political Science, Bocconi University, Milan, Italy

## Correspondence:

Carla Rognoni

SDA Bocconi School of Management

carla.rognoni@unibocconi.it

+39 3474651869

1  
2  
3  
4  
5  
6  
7  
8  
9  
10  
11  
12  
13  
14  
15  
16  
17  
18  
19  
20  
21  
22  
23  
24  
25  
26  
27  
28  
29  
30  
31  
32  
33  
34  
35  
36  
37  
38  
39  
40  
41  
42  
43  
44  
45  
46  
47  
48  
49  
50  
51  
52  
53  
54  
55  
56  
57  
58  
59  
60

*Note:* first and last author names go to the two PIs (Bocconi and San Raffaele), whereas the names of the other clinical centers are ordered alphabetically by surname.

For peer review only

## Abstract

**Introduction.** The treatment of patients with cardiogenic shock (CS), encompasses several health technologies including Impella pumps and veno-arterial extra-corporeal membrane oxygenation (VA-ECMO). However, while they are widely used in clinical practice, information on resource use and quality of life (QoL) associated to these devices is scarce. The aim of this study is therefore to collect and comparatively assess clinical and socio-economic data of Impella versus VA-ECMO for the treatment of patients with severe CS, to ultimately conduct both a cost-effectiveness (CEA) and budget impact (BIA) analyses.

**Methods and analysis.** This is a prospective plus retrospective, multicenter study conducted under the scientific coordination of the Center for Research on Health and Social Care Management (CERGAS) of SDA Bocconi School of Management and clinical coordination of IRCCS San Raffaele Scientific Institute in Milan. The Impella Network stemmed for the purposes of this study and comprises seventeen Italian clinical centers from Northern to Southern Regions in Italy. The Italian network qualifies as a subgroup of the international Impella Cardiac Surgery (ImCarS) Registry. Patients with CS treated with Impella pumps (CP, 5.0 or 5.5) will be prospectively recruited, and information on clinical outcomes, resource use and QoL collected. Economic data will be retrospectively matched with data from comparable patients treated with VA-ECMO. Both CEA and BIA will be conducted adopting the societal perspective in Italy.

**Ethics and dissemination.** The Ethical Committee of the clinical PI, IRCCS San Raffaele Hospital, approved the protocol of the ImCarS Registry. Study results will be published in peer-reviewed publications and disseminated through conference presentations.

**Conclusion.** By comparatively assessing both clinical and socio-economic data associated to two established mechanic circulatory support devices, this study will contribute to generate robust evidence in support of future coverage and reimbursement decisions.

## Strengths and limitations of this study

- This is the first study that will collect both clinical and socio-economic data of mechanic circulatory support technologies at the national level in Italy;

- Prospectively, the Impella Network creates an opportunity to expand the scope of research, and to conduct of international comparative studies;
- This study does not consider alternative therapeutic courses for the treatment of patients with cardiogenic shock (e.g., intra-aortic balloon pump), nor the combination of devices (e.g., ECPella).

For peer review only

# Introduction

## Background

Mechanical circulatory support (MCS) has gained wide application for the treatment of cardiogenic shock (CS) and received a class IIA recommendation by the most recent European Society of Cardiology guidelines on heart failure<sup>1</sup>. In recent years, transcatheter systems have brought great innovation in this field since they enable mechanical left ventricle (LV) unloading, through a lower invasive approach compared to previous generation extracorporeal support devices, equally providing high antegrade flow to reverse the shock status and end-organ damage. They have also the potential to overcome some typical limitations of MCS providing full support up to prolonged period of time and promote patients' recovery at the same time<sup>2-6</sup>.

Although both devices are widely used in daily practice, evidence on their uptake and clinical efficacy is constantly evolving. Several meta-analyses evaluated MCS devices for the management of patients with CS<sup>7-9</sup>, yet only a few were comparative studies on Impella versus VA-ECMO<sup>10-13</sup>. In this context, conducting comparative studies like randomized controlled trials (RCTs) has proven to be complex, with 5 out of seven RCTs on Impella being discontinued due to inadequate patients' enrollment<sup>14</sup>. Comparative effectiveness studies have become increasingly pivotal since the new Health Technology Assessment Regulation (HTAR 2021/2282) was approved in December 2021 by the EU Parliament<sup>15</sup>. With this regulation, high-risk, life-saving technologies would need to be comparatively assessed at the European level, in line also with the national guidelines of several countries in Europe. However, a prior review by Ardito et al. highlighted that to date virtually no study investigates comparatively socio-economic variables in association to the use of Impella versus VA-ECMO<sup>10</sup>. In light of the new regulatory provisions, the lack of comparative robust clinical and socio-economic evidence might be paralyzing for Member State who are called to take informed coverage and reimbursement decisions<sup>16-18</sup>. As a matter of fact, the limited healthcare resources need to be allocated considering not only the health impact on patient outcomes, but also the financial burden for government budgets. In this context, performing not only economic evaluations (e.g., cost-effectiveness analysis or cost-utility analysis) but also health technology assessments at large, accounting for social, organizational, legal, ethical, or environmental aspects of health technologies, will thus become increasingly pivotal for the uptake of new health technologies and their coverage under national health services. To date, there are only a few



1  
2  
3 studies investigating the cost effectiveness of MCS devices in the literature. For instance, in a study from 2013  
4  
5 by Roos et al., the cost-effectiveness of Impella was compared to the intra-aortic balloon pump (IABP) in the  
6  
7 European perspective, by considering only direct costs<sup>19</sup>. In 2015, the clinical and economic impact of  
8  
9 percutaneous ventricular assist devices (pVAD) were compared with IABP for high-risk patients undergoing  
10  
11 percutaneous coronary intervention (PCI) by means of conducting a retrospective analysis of published  
12  
13 evidence<sup>20</sup>. More recently, another study examined the benefits, harms, cost-effectiveness, and budget impact  
14  
15 of the Impella percutaneous ventricular assist device (pVAD) in high-risk PCI and CS<sup>21</sup>. This work builds on  
16  
17 the need to conduct more comparative studies in the field of MCS health technologies for the treatment of  
18  
19 cardiogenic shock, and to expand the knowledge from existing studies in the Italian framework, which report  
20  
21 clinical but not economic data<sup>22-25</sup>.

## 26 **Study objectives**

27  
28 The aim of this study is to generate comparative evidence on the use of Impella versus VA-ECMO for the  
29  
30 treatment of patients with severe CS, with the goal to ultimately perform a cost-effectiveness (CEA) and budget  
31  
32 impact (BIA) analyses from the national health system (NHS) and societal perspectives in Italy. Both  
33  
34 prospective and retrospective data on clinical endpoints and healthcare resource consumption will be collected  
35  
36 in Italian heart failure referral centers reunited in what has been named the Impella Network.

## 41 **The Impella Network**

42  
43  
44 The Impella Network has been created with the purpose of conducting this study. It is a national scientific and  
45  
46 medical entity which connects all the Italian institutions within MCS programs and referral for heart failure  
47  
48 treatment in which Impella is already used in the clinical practice. All the centers involved in the Impella  
49  
50 Network currently run MCS programs and treat patients with CS.

51  
52 The creation of the Impella Network is promoted under the joint scientific coordination of the Center for  
53  
54 Research on Health and Social Care Management (CERGAS) of SDA Bocconi School of Management and  
55  
56 IRCCS San Raffaele Scientific Institute in Milan. To answer its specific research question (i.e., assessing the  
57  
58 cost-effectiveness and budget impact of Impella versus VA-ECMO for patients with CS), the Impella Network  
59  
60

will leverage the infrastructure of the existing Impella Cardiac Surgery (ImCarS) Registry, therefore qualifying as an ImCarS subgroup analysis of the Italian scenario.

Italian centers were eligible to join the Impella Network if all the following requirements were fulfilled: i) level 2 or 3 center status (with onsite heart failure and mechanical circulatory support program); ii) implantation of Impella 5.0 or Impella CP as standard of care per site; iii) at least one Impella 5.0 or 20 Impella CP implants in the last 3 years (from 2020 to present). The centers meeting the inclusion criteria have been asked to join the Impella Network through a formal invitation from CERGAS SDA Bocconi and IRCCS San Raffaele Scientific Institute as principal clinical center. Table 1 presents the list of clinical centers who agreed to be part of this study.

*Table 1 List of clinical centers involved in the data collection*

| <b>ID</b> | <b>Clinical Center</b>                                                         | <b>Location</b> |
|-----------|--------------------------------------------------------------------------------|-----------------|
| 1         | IRCCS Ospedale San Raffaele (PI)                                               | Milano          |
| 2         | ASST Grande Ospedale Metropolitano Niguarda                                    | Milano          |
| 3         | San Giovanni Bosco Hospital                                                    | Torino          |
| 4         | Azienda Ospedaliera Universitaria di Padova                                    | Padova          |
| 5         | Policlinico di Sant'Orsola                                                     | Bologna         |
| 6         | Ospedale Careggi                                                               | Firenze         |
| 7         | Azienda Ospedaliera Universitaria Città della Salute e della Scienza di Torino | Torino          |
| 8         | Mater Dei Hospital                                                             | Bari            |
| 9         | Azienda Ospedaliera Sant'Anna e San Sebastiano                                 | Caserta         |
| 10        | Fondazione IRCCS San Gerardo dei Tintori                                       | Monza           |
| 11        | Mediterranea Cardiocentro                                                      | Napoli          |
| 12        | IRCCS Ospedale Policlinico San Martino                                         | Genova          |
| 13        | Azienda Ospedaliera S.Camillo Forlanini                                        | Roma            |
| 14        | Azienda Ospedaliero-Universitaria delle Marche                                 | Ancona          |
| 15        | IRCCS Humanitas Research Hospital                                              | Rozzano         |
| 16        | Azienda Ospedaliera-Universitaria Siena                                        | Siena           |
| 17        | Ospedale Monaldi, Azienda dei Colli                                            | Napoli          |

Interestingly, as the field of MCS evolves at high speed and scientific evidence is pivotal to improve clinical practice, the Impella Network might also become a facilitator for prospective analyses of future technologies, and be considered eligible for inclusion in international projects on MCS.

1  
2  
3  
4  
5  
6  
7  
8  
9  
10  
11  
12  
13  
14  
15  
16  
17  
18  
19  
20  
21  
22  
23  
24  
25  
26  
27  
28  
29  
30  
31  
32  
33  
34  
35  
36  
37  
38  
39  
40  
41  
42  
43  
44  
45  
46  
47  
48  
49  
50  
51  
52  
53  
54  
55  
56  
57  
58  
59  
60

## Methods and Analysis

### Study design

This will be an observational multicenter study. Patients with severe CS treated either with Impella (CP, 5.0 or 5.5) or with VA-ECMO will represent the study population in the prospective arm. This study population will be compared with a similar population of retrospective patients treated with VA-ECMO for severe CS, which will represent the control group. There is no randomization procedure and all patients will be treated according to the standard of care per site. This protocol has been written following the SPIROS (Standardized Protocol Items: Recommendations for Observational Studies) guidelines<sup>26</sup>.

The prospective study foresees a period of six months of follow-up for each patient. Investigators are requested to enroll all patients with CS in their units, according to the inclusion criteria. Data will be collected on a strictly observational basis. The investigators will carry out their usual activity, without any constraints due to the study, both in terms of diagnosis but also regarding patients' management, and the choice of possible treatments. Medical and mechanical circulatory support treatment will be initiated at the discretion of each investigator, according to routine practice. Overall study duration might be variable depending on the time needed for patient enrollment and follow-up in each site, but is estimated to be approximately around 18 months.

Information of comparable patients will be retrieved by retrospectively reviewing the clinical records of patients treated for CS in the Impella Network (retrospective study arm). This information will be retrieved by the clinicians in each participating center and will be inputted within the Impella Cardiac Surgery (ImCarS) Registry, and will ultimately populate the study database together with the information from the prospective study arm. All patients who meet inclusion and exclusion criteria in the appropriate time periods (see "Study population" paragraph) will be included, both for the patients treated with Impella (study arm) and for the patients treated with VA-ECMO (control arm).

It is anticipated that the study protocol might be subject to minor amendments depending on how the data collection unfolds (e.g. fewer patients treated with the technologies in scope to be enrolled in the study, or fewer centers participating in the study).

## Study population

### *Patients treated with Impella*

The study population will include all patients suffering from CS treated with Impella 5.5, Impella 5.0 or Impella CP at the Impella Network institutions. To be included in the study group (i.e. Impella Intention To Treat group), patients must meet all the following inclusion criteria:

- CS at presentation (as defined by INTERMACS Class 1-2-3 or SCAI Class C-D-E);
- Support as single device strategy;
- Impella support duration of at least 24 hours;
- Patients treated in the last 3 years (2020-2022) (for retrospective data collection);
- Onset of CS from less than 12 hours.

Different primary diseases and etiologies of heart failure are expected: patients will be further stratified according to the cause of heart failure and phenotype of presentation to account for potential bias in the analysis. Patients' shock degree will also be objectified through clinical risk score calculation. Furthermore, patients meeting any of the following exclusion criteria will not be included in the study:

- Impella implantation for elective protected PCI;
- Impella implantation for post-cardiotomy CS;
- Impella support duration for less than 24 hours;

### *Patients treated with VA-ECMO*

The control group will include all patients treated at the Impella Network institutions for severe left ventricular failure with VA-ECMO. To be included in the control group (i.e. VA-ECMO intention to treat group), patients must fulfill ALL the following inclusion criteria:

- CS at presentation (as defined by INTERMACS Class 1-2-3 or SCAI Class C-D-E);
- VA-ECMO support as single device strategy;
- VA-ECMO support duration of at least 24 hours;
- Onset of CS from less than 12 hours.

1  
2  
3 Different primary diseases and etiologies of heart failure are expected: patients will be further stratified  
4 according to the cause of heart failure and phenotype of presentation to account for potential bias in the  
5 analysis. Patients' shock degree will also be objectified through clinical risk score calculation. Furthermore,  
6 patients meeting any of the following exclusion criteria will not be included in the study:  
7  
8  
9

- 10 • VA-ECMO support for post-cardiotomy CS;
- 11 • VA-ECMO support duration for less than 24 hours;
- 12 • VA-ECMO for refractory prolonged cardiac arrest (ECPR);
- 13 • Presence of biventricular failure;
- 14 • Onset of CS from more than 12 hours.

15  
16 In the era of Impella 5.0/5.5, patients with CS treated with VA-ECMO may be indicative of a more severe  
17 population compared to the study group counterpart. In order to prevent potential bias, only VA-ECMO  
18 patients with isolated LV failure will be included in the study and patients with CS severity profile comparable  
19 to the Impella counterpart at baseline will be analyzed  
20  
21

### 22 **Sample size**

23 For the prospective arms, any patient treated with Impella or VA-ECMO technologies that meets the inclusion  
24 criteria will be recruited and considered for the analyses. Therefore, the sample size cannot be estimated ex-  
25 ante. For the retrospective arm, based on previous data from the Italian clinical experience, it is expected that  
26 data from approximately 200 VA-ECMO patients will be retrieved and included in the analyses.  
27  
28  
29

### 30 **Outcomes of interest**

#### 31 *Clinical parameters*

32 Data related to medical history, shock related hospitalization, mechanical circulatory support characteristics  
33 (for Impella or VA-ECMO), clinical and hospital outcomes will be collected from each center and included in  
34 a pre-specified structured data set. Short term MCS related adverse events will be defined according to most  
35 recent recommendations<sup>27</sup>. The detailed list of clinical parameters to be collected through the study is outlined  
36 in the Supplementary Materials.  
37  
38  
39  
40  
41  
42  
43  
44  
45  
46  
47  
48  
49  
50  
51  
52  
53  
54  
55  
56  
57  
58  
59  
60

### ***Healthcare resource use and costs***

Direct healthcare resource use will be identified through the analysis of collected clinical data (e.g., number of visits, device implanted, possible management of adverse events, etc.). Monetary quantification will be performed by applying official reimbursement rates (e.g., DRGs for hospitalizations or tariffs for outpatient services).

The collection of “societal costs” will be performed through the administration to patients of a socio-economic questionnaire, developed ad hoc by CERGAS researchers, and it will include information on out-of-pocket (OOP) expenses (e.g. transport costs for carrying out visits or exams), productivity losses and cost of informal care (provided by relatives). The questionnaire will be administered by the clinicians involved in the study to patients before the intervention (at baseline) and during the follow-up visits (e.g., at 30 days).

Direct healthcare resource use will be measured both for prospective and retrospective patients, while information on “societal costs” will only be available for the group of prospective patients as it is collected through patient questionnaires (not available retrospectively). The detailed list of healthcare resource use variables and the questionnaire to assess the societal impact are reported in the Supplementary Materials.

### ***Quality of life***

Only for the patients prospectively enrolled in the study, the patient's quality of life will be measured through the EuroQol 5D-5L questionnaires. EuroQol 5D-5L is a questionnaire capable of providing a generic and synthetic measure of the quality of life in relation to health. The questionnaire consists of two parts: the first includes five items that refer to different health aspects: mobility, personal care, usual activities, pain or discomfort, anxiety or depression. For each item there are five levels of response which indicate, for that area, the absence or presence of mild, moderate, severe or extreme problems. The second part of the questionnaire consists of a graduated visual analogue scale (VAS) from 0 to 100 on which the subject indicates his/her perceived state of health. The questionnaire will be administered by the clinicians involved in the study to patients before the intervention (at baseline) if possible and during the follow-up visits (e.g., at 7 days, 30 days) using a paper-based format. The questionnaire has been requested for non-commercial use via the [EuroQol website](#) (registration ID 48771), and is reported in its integral version in the Supplementary Materials.

## **Data collection and management**

Data will be collected through the infrastructure of the existing ImCarS Registry. While this study qualifies as an independent study answering a specific research question (i.e., assessing the cost-effectiveness and budget impact of Impella vs. VA-ECMO for patients with CS), it will leverage the ImCarS Registry (i.e., eCRF, IT platform, capabilities) as a facilitator for the data collection phase<sup>28</sup>, therefore qualifying as an ImCarS subgroup analysis of the Italian scenario. More in details, each center belonging to Impella Network will join the ImCarS registry and the current project will benefit from the employment of an electronic Case Report Form (eCRF), that will support any activities related to data collection. The company that will handle the eCRF and will ensure data protection is KKS Gießen Marburg. A per-patient fee of approximately 300€ for Impella cases and 100€ for VA-ECMO cases will be provided by the ImCarS Registry to each participating center. Possibly a clinical research organization (CRO) could be involved upon request of the clinical centers for the management of periodic quality controls to ensure completeness and consistency according to a specific plan agreed among the participating centers. Each clinical center will maintain the ownership of the data points of their own patients.

Patient data recorded in each participating clinical center (hospital medical records) as well as responses to quality of life and socio-economic questionnaires will be anonymized and entered by the clinicians in the eCRF of ImCarS Registry. At the end of the applicable operations and checks, the anonymized data set will be transferred to CERGAS researchers in order to perform the cost-effectiveness analysis (CEA) and budget impact analysis (BIA).

## **Data analysis**

### ***Statistical analysis***

The data obtained will be analyzed in a descriptive and inferential way using the most suitable statistical model for each variable. Continuous variables with a symmetrical distribution (e.g., age, questionnaire scores) will be expressed as means and standard deviations (SD). As regards the asymmetrically distributed continuous variables (such as, for example, hospital stay) they will be expressed as median and range. The categorical variables (gender, intra and postoperative complications) will be expressed as frequencies and percentages.

1  
2  
3 Sub-group analyses may be performed depending on the type of data collected, to have consistent results.  
4  
5 Possible missing data for the retrospective group of patients will be treated case by case, depending on the  
6  
7 quality of the data themselves.  
8

### 9 ***Cost-Effectiveness Analysis (CEA)***

11 The implementation of a CEA model<sup>29</sup> will aim to compare the management of patients with CS with Impella  
12 versus VA-ECMO from both NHS and societal perspectives in Italy. The analysis will follow the Consolidated  
13 Health Economic Evaluation Reporting Standards (CHEERS)<sup>30,31</sup>.  
14  
15

16 The model will project costs, life years (LYs) and quality adjusted life years (QALYs) on a lifetime horizon  
17 in order to evaluate the incremental cost-effectiveness ratio (ICER) and the incremental cost-utility ratio  
18 (ICUR). They will be calculated as the difference in the mean expected costs divided by the difference in the  
19 mean expected health outcomes (LYs or QALYs) of the considered management strategies.  
20  
21  
22  
23  
24

25 The CEA model will be developed based on the following phases: 1) Identification of clinical pathways and  
26 healthcare resources consumption for the considered strategies; 2) Inclusion of patients' clinical outcomes and  
27 possibly quality of life for the considered strategies (available from data collection phase); 3) Monetary  
28 quantification of the healthcare resource consumption from both NHS and societal perspectives (e.g., DRG  
29 charges/tariffs, productivity losses and out-of-pocket costs reported by the patients); 4) Analysis and  
30 interpretation of model results; 5) Sensitivity analyses.  
31  
32  
33  
34  
35  
36  
37  
38

### 39 ***Budget Impact Analysis (BIA)***

41 A BIA model will be developed starting from the CEA model to evaluate the impact on the hospital healthcare  
42 expenditure in Italy of the adoption of Impella, possibly differentiating by the type of Impella pumps, over a  
43 period of 3 or 5 years, according to the following steps: 1) Identification of patients' pathways and healthcare  
44 resources consumption for the considered strategies; 2) Monetary quantification of the healthcare resource  
45 consumption from the hospital perspective through a micro-costing analysis; 3) Definition of the current  
46 scenario of distribution of patients among the two considered options: Impella 5.0 and VA-ECMO; 4)  
47 Definition of future scenarios in which appropriate increased uses of Impella according to different annual  
48 penetration rates are considered. The forecasted increased use of Impella may be estimated on the basis of the  
49 evidence available in the literature and/or by clinical opinions collected by an ad-hoc e-survey and by  
50  
51  
52  
53  
54  
55  
56  
57  
58  
59  
60



1  
2  
3 observing market trends in other jurisdictions (e.g., Germany, USA); 5) Analysis and interpretation of model  
4  
5 results; 6) Sensitivity analyses (e.g., Impella 5.5).  
6  
7  
8

### 9 **Patient and public involvement**

10  
11 Being an observational study, patients will be enrolled as part of the research activities. Informed consent will  
12  
13 be provided to, and signed by, patients to ensure the purposes of the study are well understood, and the patients'  
14  
15 interests protected.  
16  
17

### 18 **Ethics and dissemination**

19  
20  
21  
22  
23 The study will be conducted in accordance with legal and regulatory requirements, as well as with scientific  
24  
25 purpose, value and rigor and follow generally accepted research practices described in Good Clinical Practices.  
26

27  
28 No specific risks related to the enrolment in the study are expected for patients, since the study is observational  
29  
30 and patients will receive best available treatment. Informed consent collection will be performed according to  
31  
32 the ImCarS registry protocol and eventually further disciplined according to specific guidelines and/or best  
33  
34 practices of the Ethical Committees of each clinical center. Similarly, collection of data at each participating  
35  
36 site will be performed according to the policies of the local institutional review board/ethics committee.

37  
38 All parties will comply with all applicable laws, including laws regarding the implementation of organizational  
39  
40 and technical measures to ensure protection of patient personal data. Such measures will include omitting  
41  
42 patient names or other directly identifiable data in any reports, publications, or other disclosures.  
43

44  
45 SDA Bocconi received approval of this protocol from Bocconi University's Ethical Committee (EC). IRCCS  
46  
47 San Raffaele Hospital Institute also received ethical approval of the ImCarS protocol from its EC. In parallel,  
48  
49 each clinical center presented the documentation to join the ImCarS Registry to their own ECs for approval.

50  
51 The study results will be disseminated through peer-reviewed scientific publications and presentation in  
52  
53 international conferences. The economic analyses, namely the results of the CEA and BIA analyses, will be  
54  
55 published in one or more scientific publications on top-tier, peer-reviewed journals. The exact publication  
56  
57 pipeline depends from the actual start of the data collection. After the end of the data collection, it will take  
58  
59

1  
2  
3 approximately 9 months for the research team to process the evidence and prepare the aforementioned  
4  
5 manuscripts.  
6  
7  
8  
9  
10  
11  
12  
13  
14  
15  
16  
17  
18  
19  
20  
21  
22  
23  
24  
25  
26  
27  
28  
29  
30  
31  
32  
33  
34  
35  
36  
37  
38  
39  
40  
41  
42  
43  
44  
45  
46  
47  
48  
49  
50  
51  
52  
53  
54  
55  
56  
57  
58  
59  
60

For peer review only

## List of abbreviations

BIA: Budget impact analysis

CEA: Cost-effectiveness analysis

CERGAS: Center for Research on Health and Social Care Management

CHEERS: Consolidated Health Economic Evaluation Reporting Standards

CRO: Clinical research organization

CS: Cardiogenic shock

DRG: Diagnosis related groups

EC: Ethical Committee

eCFR: electronic Case Report Form

HTAR: Health Technology Assessment Regulation

IABP: Intra-aortic balloon pump

ICER: Incremental cost-effectiveness ratio

ImCarS: Impella Cardiac Surgery

IRCCS: Istituto di Ricovero e Cura a Carattere Scientifico (research hospital)

LV: Left ventricle

LYs: Life years

MCS: Mechanical circulatory support

NHS: National Health System

OOP: Out-of-pocket

PCI: Percutaneous coronary intervention

pVAD: Percutaneous ventricular assist devices

QALYs: Quality adjusted life years

QoL: Quality of life

RCTs: Randomized controlled trials

SD: Standard deviation

SPIROS: Standardized Protocol Items: Recommendations for Observational Studies

1  
2  
3 VA-ECMO: Veno-arterial extra-corporeal membrane oxygenation  
4

5 VAS: Visual analogue scale  
6

## 7 **Footnotes**

8  
9

### 10 **Authors contributions**

11  
12 RT and AMS developed the initial study concept. VA, CR and MP devised the study design, drafted the  
13 protocol and contributed to critical revisions of the manuscript. RT and AMS are the Scientific Coordinator of  
14 the study and take overall responsibility for all aspects of study design, the protocol and the study conduct. All  
15 authors contributed to revisions of the protocol and have read and approved this manuscript.  
16  
17  
18  
19

### 20 **Funding**

21  
22 This work was supported by Abiomed Europe GmbH through an unrestricted grant.  
23  
24

### 25 **Acknowledgements**

26  
27 The authors thank Prof. Dr. Bernd Niemann from the University of Giessen and his team for their contribution  
28 to defining the variables to be included in the study protocol in line with the ImCarS Registry.  
29  
30

### 31 **Conflict of interest**

32  
33 None to declare.  
34  
35  
36  
37  
38  
39  
40  
41  
42  
43  
44  
45  
46  
47  
48  
49  
50  
51  
52  
53  
54  
55  
56  
57  
58  
59  
60

## References

1. McDonagh TA, Metra M, Adamo M, et al. 2021 ESC Guidelines for the diagnosis and treatment of acute and chronic heart failure. *European Heart Journal*. 2021;42(36):3599-3726. doi:10.1093/eurheartj/ehab368
2. Pahuja M, Hernandez-Montfort J, Whitehead EH, Kawabori M, Kapur NK. Device profile of the Impella 5.0 and 5.5 system for mechanical circulatory support for patients with cardiogenic shock: overview of its safety and efficacy. *Expert Review of Medical Devices*. 2022;19(1):1-10. doi:10.1080/17434440.2022.2015323
3. Cohen WG, Rekhtman D, Iyengar A, et al. Extended Support With the Impella 5.5: Transplant, ECMO, and Complications. *ASAIO Journal*. 2023; Publish Ahead of Print. doi:10.1097/MAT.0000000000001931
4. Schultz J, Duval S, Shaffer A, et al. Axillary or Subclavian Impella 5.0 Support in Cardiogenic Shock: A Systematic Review and Meta-analysis. *ASAIO J*. 2022;68(2):233-238. doi:10.1097/MAT.0000000000001452
5. Bernhardt AM, Potapov E, Schibilsky D, et al. First in man evaluation of a novel circulatory support device: Early experience with the Impella 5.5 after CE mark approval in Germany. *The Journal of Heart and Lung Transplantation*. 2021;40(8):850-855. doi:10.1016/j.healun.2021.04.001
6. Nersesian G, Potapov EV, Nelki V, et al. Propensity score-based analysis of 30-day survival in cardiogenic shock patients supported with different microaxial left ventricular assist devices. *Journal of Cardiac Surgery*. 2021;36(11):4141-4152. doi:10.1111/jocs.15932
7. Vargas KG, Jäger B, Kaufmann CC, et al. Impella in cardiogenic shock following acute myocardial infarction: a systematic review and meta-analysis. *Wien Klin Wochenschr*. 2020;132(23-24):716-725. doi:10.1007/s00508-020-01712-y
8. Iannaccone M, Albani S, Giannini F, et al. Short term outcomes of Impella in cardiogenic shock: A review and meta-analysis of observational studies. *International Journal of Cardiology*. 2021;324:44-51. doi:10.1016/j.ijcard.2020.09.044
9. Batsides G, Massaro J, Cheung A, Soltesz E, Ramzy D, Anderson MB. Outcomes of Impella 5.0 in Cardiogenic Shock: A Systematic Review and Meta-analysis. *Innovations (Phila)*. 2018;13(4):254-260. doi:10.1097/IMI.0000000000000535
10. Ardito V, Sarucanian L, Rognoni C, Pieri M, Scandroglio AM, Tarricone R. Impella Versus VA-ECMO for Patients with Cardiogenic Shock: Comprehensive Systematic Literature Review and Meta-Analyses. *JCDD*. 2023;10(4):158. doi:10.3390/jcdd10040158
11. Ahmad S, Ahsan MJ, Ikram S, et al. Impella Versus Extracorporeal Membranous Oxygenation (ECMO) for Cardiogenic Shock: A Systematic Review and Meta-analysis. *Current Problems in Cardiology*. 2023;48(1):101427. doi:10.1016/j.cpcardiol.2022.101427
12. Affas ZR, Touza GG, Affas S. A Meta-Analysis Comparing Venoarterial (VA) Extracorporeal Membrane Oxygenation (ECMO) to Impella for Acute Right Ventricle Failure. *Cureus*. Published online November 16, 2021. doi:10.7759/cureus.19622
13. Abusnina W, Ismayl M, Al-abdouh A, et al. IMPELLA VERSUS EXTRACORPOREAL MEMBRANE OXYGENATION IN CARDIOGENIC SHOCK: A SYSTEMATIC REVIEW AND META-ANALYSIS. *Shock*. 2022;58(5):349-357. doi:10.1097/SHK.0000000000001996

14. Is There Randomized Controlled Trial Data Available for Impella® Heart Pump Use in Cardiogenic Shock? Published online 2020. <https://www.heartrecovery.com/education/education-library/faq-rct-data-impella-cardiogenic-shock>
15. Regulation on Health Technology Assessment. [https://health.ec.europa.eu/health-technology-assessment/regulation-health-technology-assessment\\_en#:~:text=The%20new%20framework%20covers%20joint,applies%20as%20of%20January%202025](https://health.ec.europa.eu/health-technology-assessment/regulation-health-technology-assessment_en#:~:text=The%20new%20framework%20covers%20joint,applies%20as%20of%20January%202025)
16. Drummond M, Tarricone R, Torbica A. European union regulation of health technology assessment: what is required for it to succeed? *Eur J Health Econ*. Published online March 29, 2022:s10198-022-01458-6. doi:10.1007/s10198-022-01458-6
17. Tarricone R, Amatucci F, Armeni P, et al. Establishing a national HTA program for medical devices in Italy: Overhauling a fragmented system to ensure value and equal access to new medical technologies. *Health Policy*. 2021;125(5):602-608. doi:10.1016/j.healthpol.2021.03.003
18. Harmonization Of Health Technology Assessment Across The European Union: Lessons For The United States. Published online December 2, 2021. doi:10.1377/forefront.20211130.24462
19. Roos JB, Doshi SN, Konorza T, et al. The cost-effectiveness of a new percutaneous ventricular assist device for high-risk PCI patients: mid-stage evaluation from the European perspective. *Journal of Medical Economics*. 2013;16(3):381-390. doi:10.3111/13696998.2012.762004
20. Shah AP, Retzer EM, Nathan S, et al. Clinical and economic effectiveness of percutaneous ventricular assist devices for high-risk patients undergoing percutaneous coronary intervention. *J Invasive Cardiol*. 2015;27(3):148-154.
21. Health Quality Ontario. Percutaneous Ventricular Assist Devices: A Health Technology Assessment. *Ont Health Technol Assess Ser*. 2017;17(2):1-97.
22. Chieffo A, Ancona MB, Burzotta F, et al. Observational multicentre registry of patients treated with IMPella mechanical circulatory support device in Italy: the IMP-IT registry. *EuroIntervention*. 2020;15(15):e1343-e1350. doi:10.4244/EIJ-D-19-00428
23. Ancona MB, Montorfano M, Masiero G, et al. Device-related complications after Impella mechanical circulatory support implantation: an IMP-IT observational multicentre registry substudy. *European Heart Journal Acute Cardiovascular Care*. 2021;10(9):999-1006. doi:10.1093/ehjacc/zuab051
24. Tarzia V, Bagozzi L, Ponzoni M, et al. Prognosticating Mortality of Primary Cardiogenic Shock Requiring Extracorporeal Life Support: The RESCUE Score. *Current Problems in Cardiology*. 2023;48(4):101554. doi:10.1016/j.cpcardiol.2022.101554
25. Tarzia V, Bortolussi G, Bianco R, et al. Extracorporeal life support in cardiogenic shock: Impact of acute versus chronic etiology on outcome. *The Journal of Thoracic and Cardiovascular Surgery*. 2015;150(2):333-340. doi:10.1016/j.jtcvs.2015.02.043
26. Mahajan R, Burza S, Bouter LM, et al. Standardized Protocol Items Recommendations for Observational Studies (SPIROS) for Observational Study Protocol Reporting Guidelines: Protocol for a Delphi Study. *JMIR Res Protoc*. 2020;9(10):e17864. doi:10.2196/17864
27. Kormos RL, Antonides CFJ, Goldstein DJ, et al. Updated definitions of adverse events for trials and registries of mechanical circulatory support: A consensus statement of the mechanical circulatory support

1  
2  
3  
4  
5  
6  
7  
8  
9  
10  
11  
12  
13  
14  
15  
16  
17  
18  
19  
20  
21  
22  
23  
24  
25  
26  
27  
28  
29  
30  
31  
32  
33  
34  
35  
36  
37  
38  
39  
40  
41  
42  
43  
44  
45  
46  
47  
48  
49  
50  
51  
52  
53  
54  
55  
56  
57  
58  
59  
60

academic research consortium. *The Journal of Heart and Lung Transplantation*. 2020;39(8):735-750. doi:10.1016/j.healun.2020.03.010

28. Niemann B, Stoppe C, Wittenberg M, et al. Rationale and Initiative of the Impella in Cardiac Surgery (ImCarS) Register Platform. *Thorac Cardiovasc Surg*. 2022;70(06):458-466. doi:10.1055/s-0042-1749686
29. Drummond M. *Methods for the Economic Evaluation of Health Care Programmes*. OUP Oxford.; 2015.
30. Husereau D, Drummond M, Petrou S, et al. Consolidated Health Economic Evaluation Reporting Standards (CHEERS)—Explanation and Elaboration: A Report of the ISPOR Health Economic Evaluation Publication Guidelines Good Reporting Practices Task Force. *Value in Health*. 2013;16(2):231-250. doi:10.1016/j.jval.2013.02.002
31. Husereau D, Drummond M, Augustovski F, et al. Consolidated Health Economic Evaluation Reporting Standards (CHEERS) 2022 Explanation and Elaboration: A Report of the ISPOR CHEERS II Good Practices Task Force. *Value in Health*. 2022;25(1):10-31. doi:10.1016/j.jval.2021.10.008

## Supplementary Materials

### Supplementary Materials 1. Clinical parameters

Table 1 reports the comprehensive list of clinical variables to be collected for both prospective and retrospective patients. Specifically, the relevant variables for the Impella and ECMO groups are specified, along with the timing for measurements during the observation period.

| Patients' characteristics                     | Target patients |            | Timing of measurement |  |  |  |
|-----------------------------------------------|-----------------|------------|-----------------------|--|--|--|
|                                               | Impella group   | ECMO group | T0 (Baseline)         |  |  |  |
| Age (years)                                   | X               | X          | X                     |  |  |  |
| Sex (male/female)                             | X               | X          | X                     |  |  |  |
| BMI (kg/m <sup>2</sup> )                      | X               | X          | X                     |  |  |  |
| Arterial Hypertension (yes/no)                | X               | X          | X                     |  |  |  |
| Diabetes Mellitus (yes/no)                    | X               | X          | X                     |  |  |  |
| Chronic kidney disease (yes/no)               | X               | X          | X                     |  |  |  |
| Peripheral artery disease(yes/no)             | X               | X          | X                     |  |  |  |
| ICD/CRT (yes/no)                              | X               | X          | X                     |  |  |  |
| Previous PTCA (yes/no)                        | X               | X          | X                     |  |  |  |
| Previous CABG (yes/no)                        | X               | X          | X                     |  |  |  |
| Chronic heart failure (yes/no)                | X               | X          | X                     |  |  |  |
| <i>Cause of acute heart failure:</i>          |                 |            |                       |  |  |  |
| *Acute coronary syndrome (yes/no)             | X               | X          | X                     |  |  |  |
| *Myocarditis (yes/no)                         | X               | X          | X                     |  |  |  |
| *End stage dilatative cardiomyopathy (yes/no) | X               | X          | X                     |  |  |  |
| *Arrhythmia/ arrhythmic storm(yes/no)         | X               | X          | X                     |  |  |  |
| *Other (specify)                              | X               | X          | X                     |  |  |  |
| <i>Phenotype of cardiogenic shock:</i>        |                 |            |                       |  |  |  |
| * LV dominant (yes/no)                        | X               | X          | X                     |  |  |  |
| *RV isolated (yes/no)                         | X               | X          | X                     |  |  |  |
| * Biventricular failure(yes/no)               | X               | X          | X                     |  |  |  |
| Onset of shock (hours)                        | X               | X          | X                     |  |  |  |
| <i>Hemodynamic presentation of shock:</i>     |                 |            |                       |  |  |  |
| * Wet and cold (classic CS) (yes/no)          | X               | X          | X                     |  |  |  |



|                                                                 |                  |               |               |  |  |  |
|-----------------------------------------------------------------|------------------|---------------|---------------|--|--|--|
| * Wet and warm (vasodilatory CS)<br>(yes/no)                    | X                | X             | X             |  |  |  |
| * Dry and cold (euvolemic CS)<br>(yes/no)                       | X                | X             | X             |  |  |  |
| Revascularization procedure with<br>stent implantation (yes/no) | X                | X             | X             |  |  |  |
| Cardiac arrest(yes/no)                                          | X                | X             | X             |  |  |  |
| eGFR (ml/min/m2)                                                | X                | X             | X             |  |  |  |
| AKI requiring CRRT yes/no)                                      | X                | X             | X             |  |  |  |
| Mechanical ventilation yes/no)                                  | X                | X             | X             |  |  |  |
| Days of mechanical ventilation<br>yes/no)                       | X                | X             | X             |  |  |  |
| <b>Mortality risk score</b>                                     | Impella<br>group | ECMO<br>group | T0 (Baseline) |  |  |  |
| NYHA                                                            | X                | X             | X             |  |  |  |
| INTERMACS score                                                 | X                | X             | X             |  |  |  |
| SCAI class                                                      | X                | X             | X             |  |  |  |
| CARDshock score (see below)                                     | X                | X             | X             |  |  |  |
| RESCUE SCORE                                                    | X                | X             | X             |  |  |  |
| SAVE score                                                      | X                | X             | X             |  |  |  |
| <b>MCS strategy and data</b>                                    | Impella<br>group | ECMO<br>group | Event (Y/N)   |  |  |  |
| <i>Implantation pathway:</i>                                    |                  |               |               |  |  |  |
| * MCS escalation (yes/no)                                       | X                | X             | X             |  |  |  |
| * MCS de-escalation (yes/no)                                    | X                | X             | X             |  |  |  |
| * First support (yes/no)                                        | X                | X             | X             |  |  |  |
| <i>Device implantation pre PCI</i><br>(yes/no)                  | X                | X             | X             |  |  |  |
| <i>Device implantation post PCI</i><br>(yes/no)                 | X                | X             | X             |  |  |  |
| <i>Implantation strategy<sup>1</sup>:</i>                       |                  |               |               |  |  |  |
| * Bridge to recovery (yes/no)                                   | X                | X             | X             |  |  |  |
| * Bridge to LVAD (yes/no)                                       | X                | X             | X             |  |  |  |
| * Bridge to transplant (yes/no)                                 | X                | X             | X             |  |  |  |
| * Bridge to candidacy (yes/no)                                  | X                | X             | X             |  |  |  |
| <i>Implantation route:</i>                                      |                  |               |               |  |  |  |
| *Axillar (yes/no)                                               | X                | X             | X             |  |  |  |
| * Femoral (yes/no)                                              | X                | X             | X             |  |  |  |
| Successful implantation (yes/no)                                | X                | X             | X             |  |  |  |

<sup>1</sup> Typically reassessed also at the end of the patient journey, as it might be subject to changes from the original plan

|                                                               |                      |                   |                                     |                                            |                                  |                                               |
|---------------------------------------------------------------|----------------------|-------------------|-------------------------------------|--------------------------------------------|----------------------------------|-----------------------------------------------|
| Need for surgical implant (yes/no)                            | X                    | X                 | X                                   |                                            |                                  |                                               |
| Duration of implantation (min)                                | X                    | X                 | Y, minutes                          |                                            |                                  |                                               |
| <b>Hemodynamic and Lab Parameters Trend</b>                   | <b>Impella group</b> | <b>ECMO group</b> | <b>T0 (Baseline)</b>                | <b>24 h post implantation</b>              | <b>48-72 h post implantation</b> | <b>First measurement after device removal</b> |
| Mean arterial pressure (mmHg)                                 | X                    | X                 | X                                   | X                                          | X                                | X                                             |
| Systolic arterial pressure (mmHg)                             | X                    | X                 | X                                   | X                                          | X                                | X                                             |
| Heart rate (bpm)                                              | X                    | X                 | X                                   | X                                          | X                                | X                                             |
| CVP (mmHg)                                                    | X                    | X                 | X                                   | X                                          | X                                | X                                             |
| CI (l/min/mq)                                                 | X                    | X                 | X                                   | X                                          | X                                | X                                             |
| PCWP (mmHg)                                                   | X                    | X                 | X                                   | X                                          | X                                | X                                             |
| SvO2 (%)                                                      | X                    | X                 | X                                   | X                                          | X                                | X                                             |
| RVSWI (g/m/beat/m <sup>2</sup> )                              | X                    | X                 | X                                   | X                                          | X                                | X                                             |
| Creatinine (mg/dl)                                            | X                    | X                 | X                                   | X                                          | X                                | X                                             |
| Lactates (mmol/L)                                             | X                    | X                 | X                                   | X                                          | X                                | X                                             |
| Troponin (pg/ml)                                              | X                    | X                 | X                                   | X                                          | X                                | X                                             |
| Inotropic score                                               | X                    | X                 | X                                   | X                                          | X                                | X                                             |
| NT-proBNP (ng/L)                                              | X                    | X                 | X                                   | X                                          | X                                | X                                             |
| Platelets (per microliter)                                    | X                    | X                 | X                                   | X                                          | X                                | X                                             |
| D-dimers (µg/mL)                                              | X                    | X                 | X                                   | X                                          | X                                | X                                             |
| Bilirubin (mg/dl)                                             | X                    | X                 | X                                   | X                                          | X                                | X                                             |
| LV EF (%)                                                     | X                    | X                 | X                                   | X                                          | X                                | X                                             |
| RV EF (%)                                                     | X                    | X                 | X                                   | X                                          | X                                | X                                             |
| Mechanical ventilation (yes/no)                               | X                    | X                 | X                                   | X                                          | X                                | X                                             |
| <b>Safety in-hosp complications</b>                           | <b>Impella group</b> | <b>ECMO group</b> | <b>Event during support(yes/no)</b> | <b>Eventual comments/event description</b> |                                  |                                               |
| <i>Bleeding (and site):</i>                                   |                      |                   |                                     |                                            |                                  |                                               |
| *Major (yes/no)                                               | X                    | X                 |                                     |                                            |                                  |                                               |
| *Moderate (yes/no)                                            | X                    | X                 |                                     |                                            |                                  |                                               |
| *Minor (yes/no)                                               | X                    | X                 |                                     |                                            |                                  |                                               |
| Bleeding requiring surgery (yes/no)                           | X                    | X                 |                                     |                                            |                                  |                                               |
| Bleeding from Impella (ECMO insertion site (yes/no)           | X                    | X                 |                                     |                                            |                                  |                                               |
| Limb ischemia (yes/no)                                        | X                    | X                 |                                     |                                            |                                  |                                               |
| Vascular complication requiring intervention/surgery (yes/no) | X                    | X                 |                                     |                                            |                                  |                                               |
| Ischemic stroke (yes/no)                                      | X                    | X                 |                                     |                                            |                                  |                                               |
| Device malfunction(yes/no)                                    | X                    | X                 |                                     |                                            |                                  |                                               |
| LV perforation (yes/no)                                       | X                    |                   |                                     |                                            |                                  |                                               |

1  
2  
3  
4  
5  
6  
7  
8  
9  
10  
11  
12  
13  
14  
15  
16  
17  
18  
19  
20  
21  
22  
23  
24  
25  
26  
27  
28  
29  
30  
31  
32  
33  
34  
35  
36  
37  
38  
39  
40  
41  
42  
43  
44  
45  
46  
47  
48  
49  
50  
51  
52  
53  
54  
55  
56  
57  
58  
59  
60

|                                                          |               |            |                |                                     |
|----------------------------------------------------------|---------------|------------|----------------|-------------------------------------|
| Aortic valve injury (yes/no)                             | X             |            |                |                                     |
| Mitral valve injury (yes/no)                             | X             |            |                |                                     |
| Lesion to other intracardiac structure (yes/no)          | X             | X          |                |                                     |
| aortic dissection (yes/no)                               | X             | X          |                |                                     |
| Other device related injury (yes/no)                     | X             | X          |                |                                     |
| Major Hemolysis (yes/no)                                 | X             | X          |                |                                     |
| Minor Hemolysis (yes/no)                                 | X             | X          |                |                                     |
| AKI requiring CRRT (yes/no)                              | X             | X          |                |                                     |
| Sepsis (yes/no)                                          | X             | X          |                |                                     |
| Extracorporeal purification (i.e. Cytosorb) (yes/no)     |               |            |                |                                     |
| EC transfusion, numbers of unit                          | X             | X          |                |                                     |
| FFP transfusion, numbers of unit                         | X             | X          |                |                                     |
| PLT transfusion, numbers of unit                         | X             | X          |                |                                     |
| <b>Device related outcomes</b>                           | Impella group | ECMO group | Variable       | Eventual comments/event description |
| Duration of MCS support (days)                           | X             | X          |                |                                     |
| mobilization (chair) with MCS and physiotherapy (yes/no) | X             | X          |                |                                     |
| mobilization (walk) with MCS and physiotherapy (yes/no)  | X             | X          |                |                                     |
| Major device malfunction (yes/no)                        | X             | X          |                |                                     |
| Device exchange (yes/no)                                 | X             | X          |                |                                     |
| Reason for device exchange                               | X             | X          |                |                                     |
| <b>Survival and cardiac outcomes</b>                     | Impella group | ECMO group | Event (yes/no) | Eventual comments/event description |
| 30-day mortality (yes/no)                                | X             | X          |                |                                     |
| ICU mortality (yes/no)                                   | X             | X          |                |                                     |
| Hospital mortality (yes/no)                              | X             | X          |                |                                     |
| Survival to next therapy (yes/no)                        | X             | X          |                |                                     |
| Weaning from MCS (yes/no)                                | X             | X          |                |                                     |
| Myocardial recovery (yes/no)                             | X             | X          |                |                                     |
| Bridge to LVAD (yes/no)                                  | X             | X          |                |                                     |
| Bridge to Transplant (yes/no)                            | X             | X          |                |                                     |
| Cause of death                                           | X             | X          |                |                                     |
| Duration of ICU stay, days                               | X             | X          |                |                                     |
| Duration of hospital stay, days                          | X             | X          |                |                                     |
| Sequelae of hospital complication at discharge (yes/no)  | X             | X          |                |                                     |

|                                                 |   |   |  |  |
|-------------------------------------------------|---|---|--|--|
| Details of sequelae                             | X | X |  |  |
| Duration of mechanical ventilation(days)        | X | X |  |  |
| Tracheostomy (yes/no)                           | X | X |  |  |
| Able to perform self-care at discharge (yes/no) | X | X |  |  |
| Able to return to work at discharge (yes/no)    | X | X |  |  |

**CARDshock score calculation:**

Age > 75 years (yes/no)

Confusion at presentation (yes/no)

Prior myocardial infarction of CABG (yes/no)

Acute coronary syndrome ethology (yes/no)

Blood lactate level (<2/2-4/>4)

eGRF (>60/30-60/<30 ml/min/m<sup>2</sup>)

To the eCRF section dedicated to DTI, it should be added bivalirudin.

It should be added a section that recaps the types of antibiotics use and the duration of therapy (to estimate costs):

| Antibiotic class                               | Use (yes/no) | Duration of therapy (days) |
|------------------------------------------------|--------------|----------------------------|
| Cephalosporines (yes/no)                       |              |                            |
| Pennicillins (yes/no)                          |              |                            |
| Penicillins (yes/no)                           |              |                            |
| Glycopeptides (yes/no)                         |              |                            |
| Fluoroquinolones (yes/no)                      |              |                            |
| Macrolides (yes/no)                            |              |                            |
| Carbapenems (yes/no)                           |              |                            |
| Lyncosamids (yes/no)                           |              |                            |
| Aminoglicosides (yes/no)                       |              |                            |
| Tetracyclins (yes/no)                          |              |                            |
| Sulfonamides (yes/no)                          |              |                            |
| Oxazolidinones (yes/no)                        |              |                            |
| Polypeptides (yes/no)                          |              |                            |
| Other (yes/no) – specify class                 |              |                            |
| Second line antibiotic therapy needed (yes/no) |              |                            |

## Supplementary Material 2. Healthcare resource use variables (hospital data)

The health services performed to follow-up the patients will be measured by recording the number of assessments performed over the study observation period. These data represent the items necessary to determine the direct healthcare costs incurred by the healthcare system which will be included in the Cost Effectiveness Analysis (CEA). These data are normally traced by hospital records (e.g., eHRs, administrative data), and should be only transferred into the Register platform from treating clinicians. These data are not to be asked to patients. These variables will be measured throughout the patient's the hospital stay. In this study, the following data will be recorded by the doctors during the 6-month follow-up period.

### Section 1. Hospitalizations

#### 1.1 Reason for hospitalization

- Heart failure: yes/no/unknown + number
- Ictus ischemic: yes/no/unknown + number
- Ictus hemorrhagic: yes/no/unknown + number
- Bleeding: yes/no/unknown + number
- Renal failure: yes/no/unknown + number
- Respiratory failure: yes/no/unknown + number
- Arrhythmia: yes/no/unknown + number
- Other (please specify): \_\_\_\_\_ [maximum 5 reasons]

1.2 Number of bed-days in regular ward (e.g., cardiac care ward, other): n (units)

1.3 Number of days in ICU (i.e., intensive care unit): n (units)

1.4 Procedures performed (0 if no procedures are performed)

- Blood transfusion: yes/no/unknown + number
- Dialysis: yes/no/unknown + number
- Ventilatory support: yes/no/unknown + number
- Surgery: yes/no/unknown + number
- Type of surgery (qualitative comment)
- Local interventions: Gastroscopy: yes/no/unknown + number
- Local interventions: Thoracic drainage: yes/no/unknown + number
- Local interventions: Endoscopy: yes/no/unknown + number
- Local interventions: other (please specify name and units): \_\_\_\_\_
- Physiotherapy: yes/no; nr. of weekly cycles: n (units)
- Ambulatory visit: n (units)

1.5 Exams

- CT Scan: yes/no; n (units)
- MRI: yes/no; n (units)
- Angiography: yes/no; n (units)
- Other (please specify): \_\_\_\_\_

### Section 2: Pharmaceutical consumption during hospitalization

1  
2  
3 2.1 Drugs used  
4

- 5 • Antibiotics: yes/no; days on antibiotics (units)

6  
7 2.2 Medical devices used

- 8 • Nr. of Impella devices used (units)
- 9 • Nr. of ECMO devices used (units)
- 10 • Dialysis: yes/no
- 11 • Extracorporeal purification: yes/no
- 12     ○ (If yes) Cytosorb: yes/no
- 13     ○ (If yes) Other (please specify): yes/no + name
- 14
- 15
- 16 • Other (please specify) \_\_\_\_\_

17  
18 **Section 3: Emergency department**

- 19 • ER access for heart failure-related symptoms: yes/no
- 20 • ER access with no subsequent hospitalization: yes/no + number
- 21 • ER access leading to hospitalization: yes/no + number
- 22 • Use of the ambulance services: yes/no
- 23
- 24

25 **Section 4: Other relevant information**

- 26 • Recovery time needed to go back to work or to “normal life” (from clinician’s perspective): 30 days/60
- 27 days/120 days/NA
- 28
- 29
- 30
- 31
- 32
- 33
- 34
- 35
- 36
- 37
- 38
- 39
- 40
- 41
- 42
- 43
- 44
- 45
- 46
- 47
- 48
- 49
- 50
- 51
- 52
- 53
- 54
- 55
- 56
- 57
- 58
- 59
- 60

1  
2  
3  
4  
5  
6  
7  
8  
9  
10  
11  
12  
13  
14  
15  
16  
17  
18  
19  
20  
21  
22  
23  
24  
25  
26  
27  
28  
29  
30  
31  
32  
33  
34  
35  
36  
37  
38  
39  
40  
41  
42  
43  
44  
45  
46  
47  
48  
49  
50  
51  
52  
53  
54  
55  
56  
57  
58  
59  
60

### Supplementary Material 3. Patient questionnaire to assess the societal impact of the disease

The following questionnaire will be answered by patients. It has been translated in Italian and will be administered to patients in Italian, however it will be inserted in the Register in English. Both Italian and English versions are provided hereafter. The questionnaire is comprised of two parts:

- A. baseline questionnaire, to be administered at signature of informed consent/at ICU-discharge (typically in-person);
- B. follow-up questionnaire, to be administered at 6 months, typically over the phone.

\*\*\*\*\*

#### A. Baseline questionnaire

##### 1. Employment status:

###### 1.1 What is your current employment status?

If employee:

- factory worker
- employee
- manager, director

If self-employed:

- businessman/woman, freelancer
- other self-employed

If non-professional status:

- retired
- student
- housewife
- other, not employed

###### 1.2 If you are a worker, what is your employment status?

- Full time
- Part-time: 20 hours/week
- Part-time: 24 hours/week
- Part-time: 30 hours/week
- Part-time: 36 hours/week

##### 2. Travel information:

###### 2.1 How much do you spend on average to reach the hospital?

€ \_\_\_\_\_

###### 2.2 How do you typically reach the hospital?

- By car
- By public transport
- By taxi

- 1  
2  
3 • Other (specify)  
4  
5

6 \*\*\*  
7

8 B. Follow-up questionnaire  
9

10 1. Out-of-pocket (OOP) expenses information:

11 1.1 In the past 3 months, did you sustain any expense due to cardiogenic shock?

12 Yes

13 No

14 1.2 If yes, what were the healthcare expenses related to?

15 Medical care

- 16 • Specialty visits/exams (e.g., second opinion)  
17 • Drugs (e.g., non-reimbursable drugs, supplements)  
18 • Psychological support  
19 • Other (specify)  
20  
21  
22

23  
24 1.3 If yes, how much did you spend for each health event?

25 € \_\_\_\_\_

26 € \_\_\_\_\_

27 € \_\_\_\_\_  
28  
29

30 2. Hospitalizations outside the clinical site of study:

31 2.1 In the past 3 months, were you hospitalized in a different hospital from this one?

- 32 • Yes  
33 • No  
34  
35

36 2.2 If yes, please indicate the reason: \_\_\_\_\_ and the hospitalization duration (days):  
37 \_\_\_\_\_  
38

39 2.3 Did you use emergency services?

- 40 • Emergency department  
41 • Ambulance  
42 • None  
43  
44  
45

46 2.4 Did you pay for any of these services?

- 47 • Yes  
48 • No  
49  
50

51 2.5 If yes, how much did you spend?

52 € \_\_\_\_\_  
53  
54

55 3. Informal or formal assistance:

56 3.1 Who gave you informal assistance following your episode of cardiogenic shock? If more than one person,  
57 please indicate the one who gives you the most help.

- 58 • No one  
59 • Spouse/cohabitant/partner  
60



- Child
- Parent
- Brother/Sister
- Friend
- Other

3.2 If you indicated that someone assists you, how many days does this person assist you, on average, each month, due to issues related to cardiogenic shock? If you want to indicate half a day, write 0,5.

\_\_\_\_\_ days

3.3 If you indicated that someone assists you, considering the total time you receive as informal assistance from this person, please indicate what percentage you are assisted in the following activities (the sum of the percentages must make 100%):

| Activities                                                                                              | % |
|---------------------------------------------------------------------------------------------------------|---|
| Nursing activities (eg. drugs administration) and personal care (eg. getting dressed, personal washing) |   |
| Daily activities (eg. work, study, house works, family activities, entertainment, travel)               |   |
| Psychological support                                                                                   |   |

3.4 In the past 3 months, because of complications following your case of cardiogenic shock, have you turned to paid contractors/workers for household help (e.g., babysitter, domestic helper)? (1 answer only)

1. No
2. Yes; How much did you spend? \_\_\_\_\_ €

4. Limitations caused by the pathology:

4.1 In the past 3 months, approximately how many days of work (professional or home) have you lost due to problems related to cardiogenic shock (if half a day, indicate 0.5)? Exclude any days you have missed for visits, examinations or hospitalizations.

\_\_\_\_\_ days

4.2 In the past 3 months, how many days have you missed out on activities related to your personal and social life (e.g., going out with friends, hobbies, sports, family activities, etc.) due to problems related to cardiogenic shock (if half a day, indicate 0.5)? Exclude any days you have missed for visits, examinations or hospitalizations.

\_\_\_\_\_ days

#### **Supplementary Material 4. Patient questionnaire to assess quality of life (EQ-5D-5L)**

The EQ-5D-5L questionnaire will be administered to patients included prospectively in the study. The Italian validated version of the questionnaire will be employed. The questionnaire will be administered in a paper-based format, with the clinicians supporting the administration phase (e.g., reading out loud the questions to the patients and making their answers). The questionnaire will be administered to patients in Italian, and inputted in English in the Register. The questionnaire will be administered in three time points following Impella or ECMO implantation: i) after 7 days (i.e., while the patient is still in the hospital); ii) after 30 days; iii) after 6 months of follow-up. A formal request to use the EQ-5D-5L questionnaire has been submitted via the official website (ID: 48771).

### **Questionario sulla salute**

#### **Versione italiana per l'Italia**

*(Italian version for Italy)*

#### **VERSIONE PER LA SOMMINISTRAZIONE DA PARTE DELL'INTERVISTATORE/INTERVISTATRICE**

---

*Nota per l'intervistatore/intervistatrice: sebbene si debba tenere conto del particolare stile di conversazione dell'intervistatore/intervistatrice, il testo delle istruzioni del questionario dovrà essere seguito il più fedelmente possibile. Nel caso del sistema descrittivo EQ-5D-5L a pagina 2 del questionario, il testo deve essere seguito fedelmente.*

*Se l'intervistato/a ha difficoltà nello scegliere una risposta, o chiede chiarimenti, l'intervistatore/intervistatrice dovrà ripetere la domanda parola per parola e chiedere all'intervistato/a di rispondere in un modo che sia il più vicino ai suoi pensieri sulla sua salute oggi.*

---

#### **INTRODUZIONE**

*(Nota per l'intervistatore/intervistatrice: legga quanto segue all'intervistato/a.)*

1  
2  
3  
4  
5 **Desideriamo conoscere ciò che pensa della sua salute. Le spiegherò cosa fare man mano che procedo,**  
6 **ma mi interrompa pure nel caso in cui non dovesse comprendere qualcosa o ritenesse che qualcosa**  
7 **non le fosse chiaro. Non ci sono risposte giuste o sbagliate. Siamo interessati solo al suo personale**  
8 **punto di vista.**  
9

10  
11  
12 **Per prima cosa, leggerò alcune domande. Ogni domanda ha una scelta di cinque risposte. Mi dica**  
13 **quale risposta descrive meglio la sua salute OGGI.**  
14

15  
16  
17 **Non scelga più di una risposta per ogni gruppo di domande.**  
18

19  
20 *(Nota per l'intervistatore/intervistatrice: per prima cosa, legga tutte e cinque le opzioni per ogni domanda.*  
21 *Quindi, chieda all'intervistato/a di scegliere quella che pensa si applichi a se stesso/a. Ripeta la domanda*  
22 *e le opzioni se necessario. Contrassegni la casella appropriata sotto ciascun titolo. Potrebbe essere*  
23 *necessario ricordare regolarmente all'intervistato/a che l'intervallo di tempo è OGGI.)*  
24  
25  
26  
27  
28  
29  
30  
31  
32  
33  
34  
35  
36  
37  
38  
39  
40  
41  
42  
43  
44  
45  
46  
47  
48  
49  
50  
51  
52  
53  
54  
55  
56  
57  
58  
59  
60

1  
2  
3  
4 **SISTEMA DESCRITTIVO EQ-5D**  
5

6 **Per prima cosa, vorremmo chiederle della CAPACITÀ DI MOVIMENTO. Direbbe che:**  
7

- 8 1. Non ha difficoltà nel camminare   
9 2. Ha lievi difficoltà nel camminare   
10 3. Ha moderate difficoltà nel camminare   
11 4. Ha gravi difficoltà nel camminare   
12 5. Non è in grado di camminare   
13
- 

14  
15 **Quindi, vorremmo chiederle della CURA DELLA PERSONA. Direbbe che:**  
16

- 17 1. Non ha difficoltà nel lavarsi o vestirsi   
18 2. Ha lievi difficoltà nel lavarsi o vestirsi   
19 3. Ha moderate difficoltà nel lavarsi o vestirsi   
20 4. Ha gravi difficoltà nel lavarsi o vestirsi   
21 5. Non è in grado di lavarsi o vestirsi   
22
- 

23  
24 **Quindi, vorremmo chiederle delle ATTIVITÀ ABITUALI, per es. lavoro, studio, lavori**  
25 **domestici, attività familiari o di svago. Direbbe che:**  
26

- 27 1. Non ha difficoltà nello svolgimento delle attività abituali   
28 2. Ha lievi difficoltà nello svolgimento delle attività abituali   
29 3. Ha moderate difficoltà nello svolgimento delle attività abituali   
30 4. Ha gravi difficoltà nello svolgimento delle attività abituali   
31 5. Non è in grado di svolgere le attività abituali   
32
- 

33  
34 **Quindi, vorremmo chiederle quanto DOLORE O FASTIDIO prova. Direbbe che:**  
35

- 36 1. Non prova alcun dolore o fastidio   
37 2. Prova lieve dolore o fastidio   
38 3. Prova moderato dolore o fastidio   
39 4. Prova grave dolore o fastidio   
40 5. Prova estremo dolore o fastidio   
41
- 

42  
43 **Infine, vorremmo chiederle dell'ANSIA O DEPRESSIONE. Direbbe che:**  
44

- 45 1. Non è ansioso/a o depresso/a   
46 2. È lievemente ansioso/a o depresso/a   
47 3. È moderatamente ansioso/a o depresso/a   
48 4. È gravemente ansioso/a o depresso/a   
49 5. È estremamente ansioso/a o depresso/a   
50
-

## EQ-5D VAS

- Adesso, vorremmo sapere quanto è buona o cattiva la sua salute OGGI.
- Vorremmo che immaginasse una linea verticale numerata da 0 a 100.  
*(Nota per l'intervistatore/intervistatrice: in caso di intervista faccia a faccia, mostrare all'intervistato/a la linea VAS.)*
- 100 in cima alla linea rappresenta la migliore salute che può immaginare.
- 0 in fondo alla linea rappresenta la peggiore salute che può immaginare.
- Vorrei che ora mi indicasse un punto sulla linea per indicare com'è la sua salute OGGI.  
*(Nota per l'intervistatore/intervistatrice: contrassegni la linea nel punto che indica la salute dell'intervistato/a OGGI. Ora, scriva il numero indicato sulla linea nella casella sottostante.)*

LA SALUTE DELL'INTERVISTATO/A OGGI =

Grazie per il tempo dedicato a rispondere a queste domande.

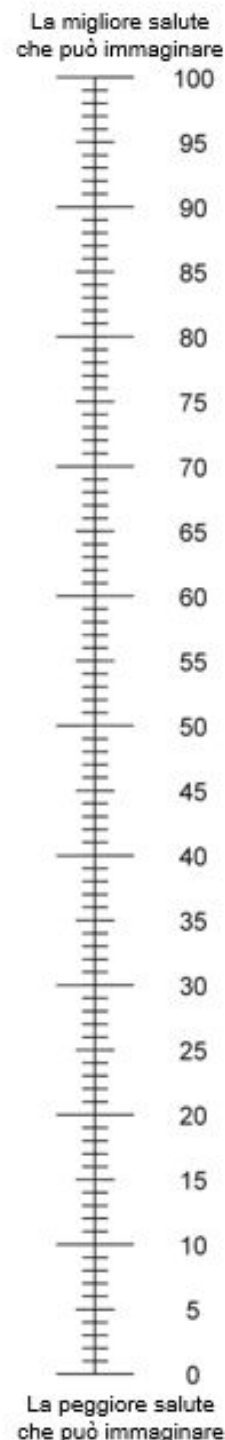

**SPIROS (Standardized Protocol Items: Recommendations for Observational Studies) checklist**

| Section and topic                   | Description / sub-categories                                                                                                                                                                                        | Addressed in the manuscript (Paragraph name) |
|-------------------------------------|---------------------------------------------------------------------------------------------------------------------------------------------------------------------------------------------------------------------|----------------------------------------------|
| <b>i) General information</b>       |                                                                                                                                                                                                                     |                                              |
| Title                               | Descriptive title identifying study design                                                                                                                                                                          | Title page                                   |
| Protocol version                    | Version or amendment number and date and summary of changes                                                                                                                                                         | NA                                           |
| Protocol summary                    | Brief summary of protocol research                                                                                                                                                                                  | Abstract                                     |
| Sponsor and partner institute name  | Name of sponsor and participating institutes (if applicable)                                                                                                                                                        | Title page; Funding                          |
| Investigators name                  | Name of principal and co investigators.                                                                                                                                                                             | Title page                                   |
| Affiliations of investigators       | Affiliated institutions of investigators                                                                                                                                                                            | Title page                                   |
| Principal researcher contact detail | Name, email address, affiliation of Principal researcher for correspondence                                                                                                                                         | Title page                                   |
| Table of content                    | Table of content                                                                                                                                                                                                    | NA                                           |
| Page number                         | Page number on each page of protocol                                                                                                                                                                                | Yes                                          |
| List of abbreviations               | A detailed List of all abbreviations used in protocol with full form.                                                                                                                                               | List of abbreviations                        |
| <b>ii) Introduction</b>             |                                                                                                                                                                                                                     |                                              |
| Background of study                 | Scientific background of study                                                                                                                                                                                      | Background                                   |
| Review of prior research            | Summary of all previous relevant research                                                                                                                                                                           | Background                                   |
| Rationale of study                  | Justification for conducting the study                                                                                                                                                                              | Background                                   |
| Aim                                 | Broader aims and specific objectives of the study                                                                                                                                                                   | Study objectives                             |
| Objective of study                  | Primary and secondary objectives of study                                                                                                                                                                           | Study objectives                             |
| Prespecified hypothesis             | Prespecified null or alternative hypothesis                                                                                                                                                                         | NA                                           |
| <b>iii) Methods</b>                 |                                                                                                                                                                                                                     |                                              |
| Study design                        | Description of type/design of study                                                                                                                                                                                 | Study design                                 |
| Study setting                       | Description of setting, locations, relevant dates, including periods of recruitment/survey, exposure, follow-up, and data collection.<br><br>Schedule of study procedure – Figure or table                          | The Impella Network                          |
| Sample size                         | Estimated number, calculation and assumptions<br><br>Power calculation                                                                                                                                              | Sample size                                  |
| Sampling procedure                  | Description of sampling strategy to ensure representativeness and control of potential bias                                                                                                                         | Study population                             |
| Participants                        | <b>Cohort study</b> —eligibility criteria, and the sources and methods of selection of participants. Describe methods of follow-up. For matched studies, give matching criteria and number of exposed and unexposed | Study population                             |

|                                               |                                                                                                                                                                                                                                                                                                                                                                                                               |                                                                                               |
|-----------------------------------------------|---------------------------------------------------------------------------------------------------------------------------------------------------------------------------------------------------------------------------------------------------------------------------------------------------------------------------------------------------------------------------------------------------------------|-----------------------------------------------------------------------------------------------|
|                                               | <p><b>Case-control study</b>—Give the eligibility criteria, and the sources and methods of case ascertainment and control selection. Give the rationale for the choice of cases and controls. For matched studies, give matching criteria and the number of controls per case</p> <p><b>Cross-sectional study</b>—Give the eligibility criteria, and the sources and methods of selection of participants</p> |                                                                                               |
| Variables                                     | <ul style="list-style-type: none"> <li>• All outcomes</li> <li>• Exposures- definition of exposure of interest,</li> <li>• Predictors</li> <li>• Potential confounders</li> <li>• Effect modifiers</li> </ul>                                                                                                                                                                                                 | Outcomes of interest (Clinical parameters; Healthcare resource use and cost; Quality of life) |
| Data Sources/Measurement                      | <ul style="list-style-type: none"> <li>• For each variable of interest, give sources of data and details of methods of assessment (measurement).</li> <li>• Describe comparability of assessment methods if there is more than one group</li> <li>• Data collection points table</li> <li>• Blinding procedure</li> </ul>                                                                                     | Supplementary material                                                                        |
| Bias                                          | <p>Describe any efforts to address potential sources of bias. More specifically:</p> <ul style="list-style-type: none"> <li>• Information bias</li> <li>• Selection Bias</li> <li>• Control for confounding</li> </ul>                                                                                                                                                                                        | NA                                                                                            |
| Statistical analysis plan                     | <ul style="list-style-type: none"> <li>• Method of primary / secondary outcomes and additional analysis</li> <li>• Handling of missing data</li> <li>• Post-hoc analysis</li> </ul>                                                                                                                                                                                                                           | Data analysis (Statistical analysis; Cost-effectiveness analysis; Budget impact analysis)     |
| Handling of withdrawals and lost to follow up | Describe the procedures to be followed when a participant ceases participation in the study prematurely or is lost to follow up                                                                                                                                                                                                                                                                               | NA                                                                                            |
| Replacements                                  | Provide information on whether or not participants who discontinue the study will be replaced via additional recruitment to maintain the required sample size.                                                                                                                                                                                                                                                | NA                                                                                            |
| Outcome                                       | Define and describe all primary and secondary outcome or lost to follow up                                                                                                                                                                                                                                                                                                                                    | Outcomes of interest (Clinical parameters; Healthcare resource use and cost; Quality of life) |
| Database management                           | <p>Detail plan of database management including:</p> <ul style="list-style-type: none"> <li>• Data collection (electronic or paper based),</li> <li>• Source data</li> <li>• Data entry</li> <li>• Data editing</li> <li>• Coding</li> <li>• Data storage</li> </ul>                                                                                                                                          | Data collection and management                                                                |

|                                                  |                                                                                                                                                              |                                                          |
|--------------------------------------------------|--------------------------------------------------------------------------------------------------------------------------------------------------------------|----------------------------------------------------------|
|                                                  | <ul style="list-style-type: none"> <li>• Record retention</li> <li>• Data confidentiality</li> </ul>                                                         |                                                          |
| Validation of instrument                         | Reliability / validity of instrument or plan to establish validation                                                                                         | NA                                                       |
| Follow up                                        | Plan of follow up and addressing lost to follow up                                                                                                           | Study design                                             |
| Quality control                                  | <ul style="list-style-type: none"> <li>• Method of quality control</li> <li>• Monitoring (internal and external)</li> <li>• Training of surveyors</li> </ul> | NA                                                       |
| Quality assurance                                | Plan of quality assurance                                                                                                                                    | NA                                                       |
| Expected outcome / results                       | A brief description of expected outcome or results                                                                                                           | NA                                                       |
| <b>iv) Ethical consideration</b>                 |                                                                                                                                                              |                                                          |
| Ethical approval                                 | Whether it has been obtained and name of ethical committees. If approval not sought, Reason                                                                  | Ethics and dissemination                                 |
| Agreement and consent                            | Method of taking consent. Reason if consent not sought                                                                                                       | Patient and public involvement; Ethics and dissemination |
| Risk / Harm to participants                      | Any potential risk or harm to study participants                                                                                                             | NA                                                       |
| Adverse event and Severe adverse event reporting | Outline how Adverse Event and Severe adverse event information will be collected.                                                                            | NA                                                       |
| <b>v) Reporting and dissemination</b>            |                                                                                                                                                              |                                                          |
| Protocol amendments                              | Methods of communicating to investigators/IRBs and documenting                                                                                               | Study design                                             |
| Dissemination                                    | How results will be disseminated to participants, practitioners, public                                                                                      | Ethics and dissemination                                 |
| Publication Plan                                 | Who has right to publish; restrictions; authorship guidelines<br>Open Access                                                                                 | Ethics and dissemination                                 |
| Reporting of early stopping                      | Dissemination of results if trial is stopped early (for any reason)                                                                                          | NA                                                       |
| <b>vi) Others</b>                                |                                                                                                                                                              |                                                          |
| Limitations                                      | Limitations of proposed study, including risk of bias                                                                                                        | Strengths and limitations of this study                  |
| Strength of study                                | Highlight strengths of proposed study                                                                                                                        | Strengths and limitations of this study                  |
| References                                       | List of references cited in protocol                                                                                                                         | References                                               |
| Data collection forms                            | Summary table of all forms used for data collection at each point of study                                                                                   | Supplementary materials                                  |
| Inform consent forms                             | Sample of informed consent form, translated into local language                                                                                              | NA                                                       |
| Funding                                          | Source of funding and the role of the funders for the present study                                                                                          | Funding                                                  |
| Acknowledgement for protocol development         | Acknowledgement of persons involved in protocol preparation                                                                                                  | Acknowledgements                                         |
| Data sharing policy                              | To describe how data will be made available in public domain.                                                                                                |                                                          |
| Contributions of authors to protocol             | Listed authors should have participated sufficiently in preparation of protocol with details of their contribution.                                          | Authors contribution                                     |
| Trial registry                                   | For observational studies also registered as trial                                                                                                           | NA                                                       |
| Annexures                                        | Data collection form /instruments                                                                                                                            | Supplementary materials                                  |



1  
2  
3  
4  
5  
6  
7  
8  
9  
10  
11  
12  
13  
14  
15  
16  
17  
18  
19  
20  
21  
22  
23  
24  
25  
26  
27  
28  
29  
30  
31  
32  
33  
34  
35  
36  
37  
38  
39  
40  
41  
42  
43  
44  
45  
46  
47  
48  
49  
50  
51  
52  
53  
54  
55  
56  
57  
58  
59  
60

|  |                                                                                                           |  |
|--|-----------------------------------------------------------------------------------------------------------|--|
|  | Informed consent form<br>Standard operating procedures (SOPs)<br>Detailed Statistical analysis plan (SAP) |  |
|--|-----------------------------------------------------------------------------------------------------------|--|

For peer review only

# BMJ Open

## Impella vs. VA-ECMO for the treatment of Patients with Cardiogenic Shock. The Impella Network project: Observational Study Protocol for Cost-effectiveness and Budget Impact Analyses

|                               |                                                                                                                                                                                                                                                                                                                                                                                                                                                                                                                                                                                                                                                                                                                                                                                                                                                                                                                                                                                                                                                                                                                                                                                                                                                                                                                                                                                                                                                                                                                                                                                                                                                                                                                                                                                                                                                                                                                                                                                                                                                                                                                                                                                                                                                                                                                                                                                                                                                                            |
|-------------------------------|----------------------------------------------------------------------------------------------------------------------------------------------------------------------------------------------------------------------------------------------------------------------------------------------------------------------------------------------------------------------------------------------------------------------------------------------------------------------------------------------------------------------------------------------------------------------------------------------------------------------------------------------------------------------------------------------------------------------------------------------------------------------------------------------------------------------------------------------------------------------------------------------------------------------------------------------------------------------------------------------------------------------------------------------------------------------------------------------------------------------------------------------------------------------------------------------------------------------------------------------------------------------------------------------------------------------------------------------------------------------------------------------------------------------------------------------------------------------------------------------------------------------------------------------------------------------------------------------------------------------------------------------------------------------------------------------------------------------------------------------------------------------------------------------------------------------------------------------------------------------------------------------------------------------------------------------------------------------------------------------------------------------------------------------------------------------------------------------------------------------------------------------------------------------------------------------------------------------------------------------------------------------------------------------------------------------------------------------------------------------------------------------------------------------------------------------------------------------------|
| Journal:                      | <i>BMJ Open</i>                                                                                                                                                                                                                                                                                                                                                                                                                                                                                                                                                                                                                                                                                                                                                                                                                                                                                                                                                                                                                                                                                                                                                                                                                                                                                                                                                                                                                                                                                                                                                                                                                                                                                                                                                                                                                                                                                                                                                                                                                                                                                                                                                                                                                                                                                                                                                                                                                                                            |
| Manuscript ID                 | bmjopen-2023-078358.R1                                                                                                                                                                                                                                                                                                                                                                                                                                                                                                                                                                                                                                                                                                                                                                                                                                                                                                                                                                                                                                                                                                                                                                                                                                                                                                                                                                                                                                                                                                                                                                                                                                                                                                                                                                                                                                                                                                                                                                                                                                                                                                                                                                                                                                                                                                                                                                                                                                                     |
| Article Type:                 | Protocol                                                                                                                                                                                                                                                                                                                                                                                                                                                                                                                                                                                                                                                                                                                                                                                                                                                                                                                                                                                                                                                                                                                                                                                                                                                                                                                                                                                                                                                                                                                                                                                                                                                                                                                                                                                                                                                                                                                                                                                                                                                                                                                                                                                                                                                                                                                                                                                                                                                                   |
| Date Submitted by the Author: | 10-Nov-2023                                                                                                                                                                                                                                                                                                                                                                                                                                                                                                                                                                                                                                                                                                                                                                                                                                                                                                                                                                                                                                                                                                                                                                                                                                                                                                                                                                                                                                                                                                                                                                                                                                                                                                                                                                                                                                                                                                                                                                                                                                                                                                                                                                                                                                                                                                                                                                                                                                                                |
| Complete List of Authors:     | <p>ARDITO, VITTORIA; SDA Bocconi School of Management<br/>         ROGNONI, CARLA; SDA Bocconi School of Management<br/>         Pieri, Marina; Istituto di Ricovero e Cura a Carattere Scientifico Ospedale San Raffaele, Department of Anesthesia and Intensive Care; Vita-Salute San Raffaele University<br/>         Barbone, Alessandro; IRCCS Humanitas Research Hospital<br/>         Briguori, Carlo; Clinica Mediterranea SpA, Mediterranea Cardiocentro<br/>         Cigala, Emanuele; Ospedale Monaldi, UOC Cardiologia Interventistica<br/>         Gerosa, Gino; Università degli Studi di Padova, Department of Cardiac, Thoracic, Vascular Sciences and Public Health<br/>         Iannaccone, Mario; ASL Città di Torino, Division of Cardiology, San Giovanni Bosco Hospital<br/>         Loforte, Antonio; Azienda Ospedaliero Universitaria Città della Salute e della Scienza di Torino, Dipartimento di Scienze Chirurgiche<br/>         Marini, Marco; Azienda Ospedaliero Universitaria delle Marche, Dipartimento di Scienze Cardiovascolari<br/>         Montalto, Andrea; Azienda Ospedaliera di Caserta Sant'Anna e San Sebastiano<br/>         Oreglia, Jacopo; Niguarda Hospital<br/>         Pacini, Davide ; University of Bologna,<br/>         Pennacchi, Mauro; Azienda Ospedaliera San Camillo Forlanini, Dipartimento Cardio Toraco Vascolare, U.O. Cardiologia Interventistica<br/>         Pestrichella, Vincenzo; Ospedale Mater Dei, Division of Cardiology<br/>         Porto, Italo; Ospedale Policlinico San Martino Istituto di Ricovero e Cura a Carattere Scientifico per l'Oncologia, DICATOV-CardioThoracic and Vascular; Università degli Studi di Genova Scuola di Scienze Mediche e Farmaceutiche, University of Genova, Policlinico San Martino IRCCS<br/>         Stefano, Pierluigi; Azienda Ospedaliero Universitaria Careggi<br/>         Tarantini, Giuseppe; Università degli Studi di Padova, Department of Cardiac, Thoracic, Vascular Sciences and Public Health<br/>         Valente, Serafina; Azienda Ospedaliera Universitaria Senese<br/>         Vandoni, Pietro; Fondazione IRCCS San Gerardo dei Tintori<br/>         Tarricone, Rosanna; Bocconi University, Department of Social and Political Science; SDA Bocconi School of Management<br/>         Scandroglio, Anna; Istituto di Ricovero e Cura a Carattere Scientifico Ospedale San Raffaele, Department of Anesthesia and Intensive Care</p> |

1  
2  
3  
4  
5  
6  
7  
8  
9  
10  
11  
12  
13  
14  
15  
16  
17  
18  
19  
20  
21  
22  
23  
24  
25  
26  
27  
28  
29  
30  
31  
32  
33  
34  
35  
36  
37  
38  
39  
40  
41  
42  
43  
44  
45  
46  
47  
48  
49  
50  
51  
52  
53  
54  
55  
56  
57  
58  
59  
60

|                                    |                                                   |
|------------------------------------|---------------------------------------------------|
| <b>Primary Subject Heading</b> :   | Health economics                                  |
| <b>Secondary Subject Heading</b> : | Cardiovascular medicine, Health economics         |
| <b>Keywords</b> :                  | CARDIOLOGY, HEALTH ECONOMICS, Observational Study |
|                                    |                                                   |

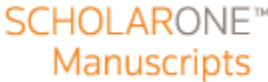

# Impella vs. VA-ECMO for the treatment of Patients with Cardiogenic Shock. The Impella Network project: Observational Study Protocol for Cost-effectiveness and Budget Impact Analyses

## Authors:

Vittoria Ardito<sup>1</sup>, Carla Rognoni<sup>1,\*</sup>, Marina Pieri<sup>2,3</sup>, Alessandro Barbone<sup>4</sup>, Carlo Briguori<sup>5</sup>, Emanuele Cigala<sup>6</sup>, Gino Gerosa<sup>7</sup>, Mario Iannaccone<sup>8</sup>, Antonio Loforte<sup>9</sup>, Marco Marini<sup>10</sup>, Andrea Montalto<sup>11</sup>, Jacopo Oreglia<sup>12</sup>, Davide Pacini<sup>13</sup>, Mauro Pennacchi<sup>14</sup>, Vincenzo Pestrichella<sup>15</sup>, Italo Porto<sup>16,17</sup>, Pierluigi Stefano<sup>18</sup>, Giuseppe Tarantini<sup>7</sup>, Serafina Valente<sup>19</sup>, Pietro Vandoni<sup>20</sup>, Rosanna Tarricone<sup>1,21</sup> and Anna Mara Scandroglio<sup>2</sup>

## Affiliations:

<sup>1</sup> Centre for Research on Health and Social Care Management (CERGAS), SDA Bocconi School of Management, Milan, Italy

<sup>2</sup> Department of Anesthesia and Intensive Care, IRCCS San Raffaele Scientific Institute, Milan, Italy

<sup>3</sup> Vita Salute San Raffaele University, Milan, Italy

<sup>4</sup> IRCCS Humanitas Research Hospital, Milan, Italy

<sup>5</sup> Mediterranea Cardiocentro, Napoli, Italy

<sup>6</sup> UOC Cardiologia Interventistica, Ospedale Monaldi, Azienda dei Colli, Napoli, Italy

<sup>7</sup> Department of Cardiac, Thoracic, Vascular Sciences and Public Health, University of Padua Medical School, Padua, Italy

<sup>8</sup> Division of Cardiology, San Giovanni Bosco Hospital, ASL Città di Torino, Turin, Italy

<sup>9</sup> AOU Città della Salute e della Scienza, Dipartimento di Scienze Chirurgiche, Università di Torino, Torino, Italy

<sup>10</sup> Azienda Ospedaliero-Universitaria delle Marche, Dipartimento di Scienze Cardiovascolari, Ancona, Italy

<sup>11</sup> Ospedale di Caserta, Caserta, Italy

<sup>12</sup> Niguarda Hospital, Milano, Italy

<sup>13</sup> Ospedale S. Orsola, Bologna, Italy

<sup>14</sup> Dipartimento Cardio Toraco Vascolare, U.O. Cardiologia Interventistica, Azienda Ospedaliera San Camillo - Forlanini, Roma, Italy

<sup>15</sup> Division of Cardiology, Mater Dei Hospital, Bari, Italy

<sup>16</sup> Cardiothoracic and Vascular Department (DICATOV), IRCCS Ospedale Policlinico San Martino, Genoa, Italy;

<sup>17</sup> Department of Internal Medicine and Medical Specialties (DIMI), University of Genoa, Genoa, Italy

<sup>18</sup> Ospedale Careggi, Firenze, Italy<sup>19</sup> Azienda Ospedaliera-Universitaria Siena, Italy

<sup>20</sup> Fondazione IRCCS San Gerardo dei Tintori, Monza, Italy

<sup>21</sup> Department of Social and Political Science, Bocconi University, Milan, Italy

## Correspondence:

Centre for Research on Health and Social Care Management (CERGAS), SDA Bocconi School of Management, Bocconi University, Via Sarfatti 10, Milan 20136, Italy

Phone: +39 02 5836 2729

Email: carla.rognoni@unibocconi.it

1  
2  
3  
4  
5  
6  
7  
8  
9  
10  
11  
12  
13  
14  
15  
16  
17  
18  
19  
20  
21  
22  
23  
24  
25  
26  
27  
28  
29  
30  
31  
32  
33  
34  
35  
36  
37  
38  
39  
40  
41  
42  
43  
44  
45  
46  
47  
48  
49  
50  
51  
52  
53  
54  
55  
56  
57  
58  
59  
60

*Note:* first and last author names go to the two PIs (Bocconi and San Raffaele), whereas the names of the other clinical centers are ordered alphabetically by surname.

For peer review only

## Abstract

**Introduction.** The treatment of patients with cardiogenic shock (CS), encompasses several health technologies including Impella pumps and veno-arterial extra-corporeal membrane oxygenation (VA-ECMO). However, while they are widely used in clinical practice, information on resource use and quality of life (QoL) associated to these devices is scarce. The aim of this study is therefore to collect and comparatively assess clinical and socio-economic data of Impella versus VA-ECMO for the treatment of patients with severe CS, to ultimately conduct both a cost-effectiveness (CEA) and budget impact (BIA) analyses.

**Methods and analysis.** This is a prospective plus retrospective, multicenter study conducted under the scientific coordination of the Center for Research on Health and Social Care Management (CERGAS) of SDA Bocconi School of Management and clinical coordination of IRCCS San Raffaele Scientific Institute in Milan. The Impella Network stemmed for the purposes of this study and comprises seventeen Italian clinical centers from Northern to Southern Regions in Italy. The Italian network qualifies as a subgroup of the international Impella Cardiac Surgery (ImCarS) Registry. Patients with CS treated with Impella pumps (CP, 5.0 or 5.5) will be prospectively recruited, and information on clinical outcomes, resource use and QoL collected. Economic data will be retrospectively matched with data from comparable patients treated with VA-ECMO. Both CEA and BIA will be conducted adopting the societal perspective in Italy. This study will contribute to generate new socio-economic evidence to inform future coverage decisions.

**Ethics and dissemination.** The Ethical Committee of 3 clinical centers already approved the protocol, while the other centers are in the process of getting Ethical Committee approval. Study results will be published in peer-reviewed publications and disseminated through conference presentations.

## Strengths and limitations of this study

- This is an observational multicenter study that will evaluate the cost-effectiveness and budget impact associated to use of Impella against VA-ECMO in the treatment of patients with cardiogenic shock;

- 1  
2  
3  
4  
5  
6  
7  
8  
9  
10  
11  
12  
13  
14  
15  
16  
17  
18  
19  
20  
21  
22  
23  
24  
25  
26  
27  
28  
29  
30  
31  
32  
33  
34  
35  
36  
37  
38  
39  
40  
41  
42  
43  
44  
45  
46  
47  
48  
49  
50  
51  
52  
53  
54  
55  
56  
57  
58  
59  
60
- The analyses will be performed with the two-fold perspective of the national health system and the larger society in Italy;
  - Data collection will leverage the existing infrastructure of the Impella Cardiac Surgery (ImCarS) Registry;
  - The outcomes of interests that will be collected are both clinical parameters and socio-economic data, including healthcare resource use and costs, and quality of life;
  - This study does not consider alternative therapeutic courses for the treatment of patients with cardiogenic shock (e.g., intra-aortic balloon pump, pharmacological therapy alone), nor the combination of devices (e.g., ECPPELLA), as primary therapeutic strategy.

# Introduction

## Background

Mechanical circulatory support (MCS) has gained wide application for the treatment of cardiogenic shock (CS) and received a class IIA recommendation by the most recent European Society of Cardiology guidelines on heart failure [1]. In recent years, transcatheter systems have brought great innovation in this field since they enable mechanical left ventricle (LV) unloading, through a lower invasive approach compared to previous generation extracorporeal support devices, equally providing high anterograde flow to reverse the shock status and end-organ damage. They have also the potential to overcome some typical limitations of MCS providing full support up to prolonged period of time and promote patients' recovery at the same time [2–6].

Although both devices are widely used in daily practice, evidence on their uptake and clinical efficacy is constantly evolving. Several meta-analyses evaluated MCS devices for the management of patients with CS [7–9], yet only a few were comparative studies on Impella versus VA-ECMO [10–13]. In this context, conducting comparative studies like randomized controlled trials (RCTs) has proven to be complex, with 5 out of seven RCTs on Impella being discontinued due to inadequate patients' enrollment [14]. Comparative effectiveness studies have become increasingly pivotal since the new Health Technology Assessment Regulation (HTAR 2021/2282) was approved in December 2021 by the EU Parliament [15]. With this regulation, high-risk, life-saving technologies would need to be comparatively assessed at the European level, in line also with the national guidelines of several countries in Europe. However, a prior review by Ardito et al. highlighted that to date virtually no study investigates comparatively socio-economic variables in association to the use of Impella versus VA-ECMO [10]. In light of the new regulatory provisions, the lack of comparative robust clinical and socio-economic evidence might be paralyzing for Member State who are called to take informed coverage and reimbursement decisions [16–18]. As a matter of fact, the limited healthcare resources need to be allocated considering not only the health impact on patient outcomes, but also the financial burden for government budgets. In this context, performing not only economic evaluations (e.g., cost-effectiveness analysis or cost-utility analysis) but also health technology assessments at large, accounting for social, organizational, legal, ethical, or environmental aspects of health technologies, will thus become increasingly pivotal for the uptake of new health technologies and their coverage under national health



1  
2  
3 services. To date, there are only a few studies investigating the cost effectiveness of MCS devices in the  
4  
5 literature. For instance, in a study from 2013 by Roos et al., the cost-effectiveness of Impella was compared to  
6  
7 the intra-aortic balloon pump (IABP) in the European perspective, by considering only direct costs [19]. In  
8  
9 2015, the clinical and economic impact of percutaneous ventricular assist devices (pVAD) were compared  
10  
11 with IABP for high-risk patients undergoing percutaneous coronary intervention (PCI) by means of conducting  
12  
13 a retrospective analysis of published evidence [20]. More recently, another study examined the benefits, harms,  
14  
15 cost-effectiveness, and budget impact of the Impella percutaneous ventricular assist device (pVAD) in high-  
16  
17 risk PCI and CS [21]. This work builds on the need to conduct more comparative studies in the field of MCS  
18  
19 health technologies for the treatment of cardiogenic shock, and to expand the knowledge from existing studies  
20  
21 in the Italian framework, which report clinical but not economic data [22–25].  
22  
23  
24  
25

## 26 **Study objectives**

27  
28 The aim of this study is to generate comparative evidence on the use of Impella versus VA-ECMO for the  
29  
30 treatment of patients with severe CS, with the goal to ultimately perform a cost-effectiveness (CEA) and budget  
31  
32 impact (BIA) analyses from the national health system (NHS) and societal perspectives in Italy. Both  
33  
34 prospective and retrospective data on clinical endpoints and healthcare resource consumption will be collected  
35  
36 in Italian heart failure referral centers reunited in what has been named the Impella Network.  
37  
38  
39  
40

## 41 **The Impella Network**

42  
43 The Impella Network has been created with the purpose of conducting this study. It is a national scientific and  
44  
45 medical entity which connects all the Italian institutions within MCS programs and referral for heart failure  
46  
47 treatment in which Impella is already used in the clinical practice. All the centers involved in the Impella  
48  
49 Network currently run MCS programs and treat patients with CS.  
50  
51

52 The creation of the Impella Network is promoted under the joint scientific coordination of the Center for  
53  
54 Research on Health and Social Care Management (CERGAS) of SDA Bocconi School of Management and  
55  
56 IRCCS San Raffaele Scientific Institute in Milan. To answer its specific research question (i.e., assessing the  
57  
58 cost-effectiveness and budget impact of Impella versus VA-ECMO for patients with CS), the Impella Network  
59  
60

will leverage the infrastructure of the existing Impella Cardiac Surgery (ImCarS) Registry, therefore qualifying as an ImCarS subgroup analysis of the Italian scenario.

Italian centers were eligible to join the Impella Network if all the following requirements were fulfilled: i) level 2 or 3 center status (with onsite heart failure and mechanical circulatory support program); ii) implantation of Impella 5.0 or Impella CP as standard of care per site; iii) at least one Impella 5.0 or 20 Impella CP implants in the last 3 years (from 2020 to present). The centers meeting the inclusion criteria have been asked to join the Impella Network through a formal invitation from CERGAS SDA Bocconi and IRCCS San Raffaele Scientific Institute as principal clinical center. Table 1 presents the list of clinical centers who agreed to be part of this study.

*Table 1 List of clinical centers involved in the data collection*

| <b>ID</b> | <b>Clinical Center</b>                                                         | <b>Location</b> |
|-----------|--------------------------------------------------------------------------------|-----------------|
| 1         | IRCCS Ospedale San Raffaele (PI)                                               | Milano          |
| 2         | ASST Grande Ospedale Metropolitano Niguarda                                    | Milano          |
| 3         | San Giovanni Bosco Hospital                                                    | Torino          |
| 4         | Azienda Ospedaliera Universitaria di Padova                                    | Padova          |
| 5         | Policlinico di Sant'Orsola                                                     | Bologna         |
| 6         | Ospedale Careggi                                                               | Firenze         |
| 7         | Azienda Ospedaliera Universitaria Città della Salute e della Scienza di Torino | Torino          |
| 8         | Mater Dei Hospital                                                             | Bari            |
| 9         | Azienda Ospedaliera Sant'Anna e San Sebastiano                                 | Caserta         |
| 10        | Fondazione IRCCS San Gerardo dei Tintori                                       | Monza           |
| 11        | Mediterranea Cardiocentro                                                      | Napoli          |
| 12        | IRCCS Ospedale Policlinico San Martino                                         | Genova          |
| 13        | Azienda Ospedaliera S.Camillo Forlanini                                        | Roma            |
| 14        | Azienda Ospedaliero-Universitaria delle Marche                                 | Ancona          |
| 15        | IRCCS Humanitas Research Hospital                                              | Rozzano         |
| 16        | Azienda Ospedaliera-Universitaria Siena                                        | Siena           |
| 17        | Ospedale Monaldi, Azienda dei Colli                                            | Napoli          |

Interestingly, as the field of MCS evolves at high speed and scientific evidence is pivotal to improve clinical practice, the Impella Network might also become a facilitator for prospective analyses of future technologies, and be considered eligible for inclusion in international projects on MCS.

## Methods and Analysis

### Study design

This will be an observational multicenter study. Patients with severe CS treated either with Impella (CP, 5.0 or 5.5) or with VA-ECMO will represent the study population in the prospective arm. This study population will be compared with a similar population of retrospective patients treated with VA-ECMO for severe CS, which will represent the control group. There is no randomization procedure and all patients will be treated according to the standard of care per site. This protocol has been written following the SPIROS (Standardized Protocol Items: Recommendations for Observational Studies) guidelines [26].

The prospective study foresees a period of six months of follow-up for each patient. Investigators are requested to enroll all patients with CS in their units, according to the inclusion criteria. Data will be collected on a strictly observational basis. The investigators will carry out their usual activity, without any constraints due to the study, both in terms of diagnosis but also regarding patients' management, and the choice of possible treatments. Medical and mechanical circulatory support treatment will be initiated at the discretion of each investigator, according to routine practice. Overall study duration might be variable depending on the time needed for patient enrollment and follow-up in each site, but is estimated to be approximately around 18 months.

Information of comparable patients will be retrieved by retrospectively reviewing the clinical records of patients treated for CS in the Impella Network (retrospective study arm). This information will be retrieved by the clinicians in each participating center and will be inputted within the Impella Cardiac Surgery (ImCarS) Registry, and will ultimately populate the study database together with the information from the prospective study arm. All patients who meet inclusion and exclusion criteria in the appropriate time periods (see "Study population" paragraph) will be included, both for the patients treated with Impella (study arm) and for the patients treated with VA-ECMO (control arm).

It is anticipated that the study protocol might be subject to minor amendments depending on how the data collection unfolds (e.g. fewer patients treated with the technologies in scope to be enrolled in the study, or fewer centers participating in the study).

## Study population

### *Patients treated with Impella*

The study population will include all patients suffering from CS, according to clinically relevant classifications (Interagency Registry for mechanically assisted circulatory support (INTERMACS) and International Society for Cardiovascular Angiography and Interventions (SCAI)) treated with Impella 5.5, Impella 5.0 or Impella CP at the Impella Network institutions. To be included in the study group (i.e. Impella Intention To Treat group), patients must meet all the following inclusion criteria:

- CS at presentation (as defined by INTERMACS Class 1-2-3 or SCAI Class C-D-E);
- Support as single device strategy;
- Impella support duration of at least 24 hours;
- Patients treated in the last 3 years (2020-2022) (for retrospective data collection);
- Onset of CS from less than 12 hours.

Different primary diseases and etiologies of heart failure are expected: patients will be further stratified according to the cause of heart failure and phenotype of presentation to account for potential bias in the analysis. Patients' shock degree will also be objectified through clinical risk score calculation. Furthermore, patients meeting any of the following exclusion criteria will not be included in the study:

- Impella implantation for elective protected PCI;
- Impella implantation for post-cardiotomy CS;
- Impella support duration for less than 24 hours;

### *Patients treated with VA-ECMO*

The control group will include all patients treated at the Impella Network institutions for severe left ventricular failure with VA-ECMO. To be included in the control group (i.e. VA-ECMO intention to treat group), patients must fulfill ALL the following inclusion criteria:

- CS at presentation (as defined by INTERMACS Class 1-2-3 or SCAI Class C-D-E);
- VA-ECMO support as single device strategy;
- VA-ECMO support duration of at least 24 hours;

- Onset of CS from less than 12 hours.

Different primary diseases and etiologies of heart failure are expected: patients will be further stratified according to the cause of heart failure and phenotype of presentation to account for potential bias in the analysis. Patients' shock degree will also be objectified through clinical risk score calculation. Furthermore, patients meeting any of the following exclusion criteria will not be included in the study:

- VA-ECMO support for post-cardiotomy CS;
- VA-ECMO support duration for less than 24 hours;
- VA-ECMO for refractory prolonged cardiac arrest (ECPR);
- Presence of biventricular failure;
- Onset of CS from more than 12 hours.

In the era of Impella 5.0/5.5, patients with CS treated with VA-ECMO may be indicative of a more severe population compared to the study group counterpart. In order to prevent potential bias, only VA-ECMO patients with isolated LV failure will be included in the study and patients with CS severity profile comparable to the Impella counterpart at baseline will be analyzed.

### **Sample size**

For the prospective arms, any patient treated with Impella or VA-ECMO technologies that meets the inclusion criteria will be recruited and considered for the analyses. Therefore, the sample size cannot be estimated ex-ante. For the retrospective arm, based on previous data from the Italian clinical experience, it is expected that data from approximately 200 VA-ECMO patients will be retrieved and included in the analyses.

### **Outcomes of interest**

#### ***Clinical parameters***

Data related to medical history, shock related hospitalization, mechanical circulatory support characteristics (for Impella or VA-ECMO), clinical and hospital outcomes will be collected from each center and included in a pre-specified structured data set. Short term MCS related adverse events will be defined according to most recent recommendations [27]. In addition to data registered at specific time points (for example, at baseline)

1  
2  
3 and outcome measures, several hemodynamic, laboratory and clinical data will be assessed regularly during  
4 the treatment with Impella or VA ECMO to assess the evolution of the condition of shock during support. The  
5 detailed list of clinical parameters to be collected through the study is outlined in the Supplementary Materials.  
6  
7

### 8 9 ***Healthcare resource use and costs***

10  
11 Direct healthcare resource use will be identified through the analysis of collected clinical data (e.g., number of  
12 visits, device implanted, possible management of adverse events, etc.). Monetary quantification will be  
13 performed by applying official reimbursement rates (e.g., DRGs for hospitalizations or tariffs for outpatient  
14 services).  
15  
16

17  
18 The collection of “societal costs” will be performed through the administration to patients of a socio-economic  
19 questionnaire, developed ad hoc by CERGAS researchers, and it will include information on out-of-pocket  
20 (OOP) expenses (e.g. transport costs for carrying out visits or exams), productivity losses and cost of informal  
21 care (provided by relatives). The questionnaire will be administered by the clinicians involved in the study to  
22 patients before the intervention (at baseline) and during the follow-up visits (e.g., at 30 days).  
23  
24

25  
26 Direct healthcare resource use will be measured both for prospective and retrospective patients, while  
27 information on “societal costs” will only be available for the group of prospective patients as it is collected  
28 through patient questionnaires (not available retrospectively). The detailed list of healthcare resource use  
29 variables and the questionnaire to assess the societal impact are reported in the Supplementary Materials.  
30  
31

### 32 33 ***Quality of life***

34  
35 Only for the patients prospectively enrolled in the study, the patient's quality of life will be measured through  
36 the EuroQol 5D-5L questionnaires. EuroQol 5D-5L is a questionnaire capable of providing a generic and  
37 synthetic measure of the quality of life (QoL) in relation to health. The questionnaire consists of two parts: the  
38 first includes five items that refer to different health aspects: mobility, personal care, usual activities, pain or  
39 discomfort, anxiety or depression. For each item there are five levels of response which indicate, for that area,  
40 the absence or presence of mild, moderate, severe or extreme problems. The second part of the questionnaire  
41 consists of a graduated visual analogue scale (VAS) from 0 to 100 on which the subject indicates his/her  
42 perceived state of health. The questionnaire will be administered by the clinicians involved in the study to  
43 patients before the intervention (at baseline) if possible and during the follow-up visits (e.g., at 7 days, 30 days)  
44  
45  
46  
47  
48  
49  
50  
51  
52  
53  
54  
55  
56  
57  
58  
59  
60

1  
2  
3 using a paper-based format. The clinicians will choose an appropriate timing to fill in the questionnaire, namely  
4 when patients are awake, conscious and willing to respond. However, should the patients be too weak to  
5 respond, or should they fail to recover from the shock, they will be excluded from the QoL analyses.  
6  
7

8  
9 The questionnaire has been requested for non-commercial use via the [EuroQol website](#) (registration ID 48771),  
10 and is reported in its integral version in the Supplementary Materials.  
11  
12  
13  
14

### 15 **Data collection and management**

16  
17 Data will be collected through the infrastructure of the existing ImCarS Registry. While this study qualifies as  
18 an independent study answering a specific research question (i.e., assessing the cost-effectiveness and budget  
19 impact of Impella vs. VA-ECMO for patients with CS), it will leverage the ImCarS Registry (i.e., eCRF, IT  
20 platform, capabilities) as a facilitator for the data collection phase [28], therefore qualifying as an ImCarS  
21 subgroup analysis of the Italian scenario. More in details, each center belonging to Impella Network will join  
22 the ImCarS registry and the current project will benefit from the employment of an electronic Case Report  
23 Form (eCRF), that will support any activities related to data collection. The company that will handle the eCRF  
24 and will ensure data protection is KKS Gießen Marburg. A per-patient fee of approximately 300€ for Impella  
25 cases and 100€ for VA-ECMO cases will be provided by the ImCarS Registry to each participating center.  
26  
27 Possibly a clinical research organization (CRO) could be involved upon request of the clinical centers for the  
28 management of periodic quality controls to ensure completeness and consistency according to a specific plan  
29 agreed among the participating centers. Each clinical center will maintain the ownership of the data points of  
30 their own patients.  
31  
32  
33  
34  
35  
36  
37  
38  
39  
40  
41  
42  
43  
44

45 Patient data recorded in each participating clinical center (hospital medical records) as well as responses to  
46 quality of life and socio-economic questionnaires will be anonymized and entered by the clinicians in the eCRF  
47 of ImCarS Registry. At the end of the applicable operations and checks, the anonymized data set will be  
48 transferred to CERGAS researchers in order to perform the cost-effectiveness analysis (CEA) and budget  
49 impact analysis (BIA).  
50  
51  
52  
53  
54  
55  
56  
57  
58  
59  
60

## **Data analysis**

### ***Statistical analysis***

The data obtained will be analyzed in a descriptive and inferential way using the most suitable statistical model for each variable. Continuous variables with a symmetrical distribution (e.g., age, questionnaire scores) will be expressed as means and standard deviations (SD). As regards the asymmetrically distributed continuous variables (such as, for example, hospital stay) they will be expressed as median and range. The categorical variables (gender, intra and postoperative complications) will be expressed as frequencies and percentages. Sub-group analyses may be performed depending on the type of data collected, to have consistent results. Possible missing data for the retrospective group of patients will be treated case by case, depending on the quality of the data themselves.

### ***Cost-Effectiveness Analysis (CEA)***

The implementation of a CEA model [29] will aim to compare the management of patients with CS with Impella versus VA-ECMO from both NHS and societal perspectives in Italy. The analysis will follow the Consolidated Health Economic Evaluation Reporting Standards (CHEERS) [30, 31].

The model will project costs, life years (LYs) and quality adjusted life years (QALYs) on a lifetime horizon in order to evaluate the incremental cost-effectiveness ratio (ICER) and the incremental cost-utility ratio (ICUR). They will be calculated as the difference in the mean expected costs divided by the difference in the mean expected health outcomes (LYs or QALYs) of the considered management strategies. It has to be specified that QoL will be measured as long as patients stay alive. Interpolation techniques might be used to manage missing data (e.g., to carry forward QoL measurements occurred prior to death); however, patients who never completed QoL measurements will be excluded from QALYs analyses.

The CEA model will be developed based on the following phases: 1) Identification of clinical pathways and healthcare resources consumption for the considered strategies; 2) Inclusion of patients' clinical outcomes and possibly quality of life for the considered strategies (available from data collection phase); 3) Monetary quantification of the healthcare resource consumption from both NHS and societal perspectives (e.g., DRG charges/tariffs, productivity losses and out-of-pocket costs reported by the patients); 4) Analysis and interpretation of model results; 5) Sensitivity analyses. In addition, if collected data will allow it, centers will



1  
2  
3 be clustered based on the number of implanted Impella devices and patients treated, to investigate if there is a  
4 relationship between cost-effectiveness and the volumes of device use in each center. The definition of the  
5 clusters and conduct of sub-group analyses will depend on the data that will be actually collected.  
6  
7  
8

### 9 ***Budget Impact Analysis (BIA)***

10  
11 A BIA model will be developed starting from the CEA model to evaluate the impact on the hospital healthcare  
12 expenditure in Italy of the adoption of Impella, possibly differentiating by the type of Impella pumps, over a  
13 period of 3 or 5 years, according to the following steps: 1) Identification of patients' pathways and healthcare  
14 resources consumption for the considered strategies; 2) Monetary quantification of the healthcare resource  
15 consumption from the hospital perspective through a micro-costing analysis; 3) Definition of the current  
16 scenario of distribution of patients among the two considered options: Impella 5.0 and VA-ECMO; 4)  
17 Definition of future scenarios in which appropriate increased uses of Impella according to different annual  
18 penetration rates are considered. The forecasted increased use of Impella may be estimated on the basis of the  
19 evidence available in the literature and/or by clinical opinions collected by an ad-hoc e-survey and by  
20 observing market trends in other jurisdictions (e.g., Germany, USA); 5) Analysis and interpretation of model  
21 results; 6) Sensitivity analyses (e.g., Impella 5.5).  
22  
23  
24  
25  
26  
27  
28  
29  
30  
31  
32  
33

34  
35 As a final note, it has to be highlighted that the BIA will be conducted from an Italian perspective, based on  
36 the cost framework observed within Italian facilities. Therefore, extending the study results to other  
37 geographical contexts should be done with caution, and marginal adjustments might be needed to account for  
38 country-specific differences in the costs sustained at the local level.  
39  
40  
41  
42  
43  
44

### 45 **Patient and public involvement**

46  
47 Being an observational study, patients will be enrolled as part of the research activities. Informed consent will  
48 be provided to, and signed by, patients to ensure the purposes of the study are well understood, and the patients'  
49 interests protected. We plan on involving relevant patient associations when disseminating the study results.  
50  
51  
52  
53  
54  
55  
56  
57  
58  
59  
60

## Ethics and dissemination

The study will be conducted in accordance with legal and regulatory requirements, as well as with scientific purpose, value and rigor and follow generally accepted research practices described in Good Clinical Practices.

No specific risks related to the enrolment in the study are expected for patients, since the study is observational and patients will receive best available treatment. Informed consent collection will be performed according to the ImCarS registry protocol and eventually further disciplined according to specific guidelines and/or best practices of the Ethical Committees of each clinical center. Similarly, collection of data at each participating site will be performed according to the policies of the local institutional review board/ethics committee.

All parties will comply with all applicable laws, including laws regarding the implementation of organizational and technical measures to ensure protection of patient personal data. Such measures will include omitting patient names or other directly identifiable data in any reports, publications, or other disclosures.

SDA Bocconi received approval of this protocol from Bocconi University's Ethical Committee (EC). IRCCS San Raffaele Hospital Institute also received ethical approval of the ImCarS protocol from its EC. In parallel, each clinical center presented the documentation to join the ImCarS Registry to their own ECs for approval: currently, Azienda Ospedaliera San Camillo Forlanini (Rome) and Clinica Mediterranea (Naples) among participating centers already received the approval of ethical committee.

The study results will be disseminated through peer-reviewed scientific publications and presentation in international conferences. The economic analyses, namely the results of the CEA and BIA analyses, will be published in one or more scientific publications on top-tier, peer-reviewed journals. The exact publication pipeline depends from the actual start of the data collection. After the end of the data collection, it will take approximately 9 months for the research team to process the evidence and prepare the aforementioned manuscripts.

## List of abbreviations

BIA: Budget impact analysis

CEA: Cost-effectiveness analysis

CERGAS: Center for Research on Health and Social Care Management

CHEERS: Consolidated Health Economic Evaluation Reporting Standards

CRO: Clinical research organization

CS: Cardiogenic shock

DRG: Diagnosis related groups

EC: Ethical Committee

eCFR: electronic Case Report Form

HTAR: Health Technology Assessment Regulation

IABP: Intra-aortic balloon pump

ICER: Incremental cost-effectiveness ratio

ImCarS: Impella Cardiac Surgery

IRCCS: Istituto di Ricovero e Cura a Carattere Scientifico (research hospital)

LV: Left ventricle

LYs: Life years

MCS: Mechanical circulatory support

NHS: National Health System

OOP: Out-of-pocket

PCI: Percutaneous coronary intervention

pVAD: Percutaneous ventricular assist devices

QALYs: Quality adjusted life years

QoL: Quality of life

RCTs: Randomized controlled trials

SD: Standard deviation

SPIROS: Standardized Protocol Items: Recommendations for Observational Studies

1  
2  
3 VA-ECMO: Veno-arterial extra-corporeal membrane oxygenation  
4

5 VAS: Visual analogue scale  
6

## 7 **Footnotes**

8  
9

### 10 **Authors contributions**

11  
12 RT and AMS developed the initial study concept. VA, CR and MP devised the study design, including  
13 methodology, and wrote the original draft of the protocol. AB, CB, EC, GG, MI, AL, MM, AM, JO, DP, MP,  
14 VP, IP, PS, GT, SV, PV contributed to critical revisions of the manuscript. RT and AMS are the Scientific  
15 Coordinators of the study and take overall responsibility for all aspects of study design, the protocol and the  
16 study conduct. RT acquired funding for the study. All authors VA, CR, MP, AB, CB, EC, GG, MI, AL, MM,  
17 AM, JO, DP, MP, VP, IP, PS, GT, SV, PV, RT and AMS contributed to review and editing of the protocol and  
18 have read and approved this manuscript.  
19  
20  
21  
22  
23  
24  
25  
26

### 27 **Funding**

28  
29 This work was supported by Abiomed Europe GmbH through an unrestricted grant (grant number: N/A).  
30  
31  
32

### 33 **Acknowledgements**

34  
35 The authors thank Prof. Dr. Bernd Niemann from the University of Giessen and his team for their contribution  
36 to defining the variables to be included in the study protocol in line with the ImCarS Registry.  
37  
38

### 39 **Conflict of interest**

40  
41 None to declare.  
42  
43  
44  
45  
46  
47  
48  
49  
50  
51  
52  
53  
54  
55  
56  
57  
58  
59  
60

## References

- [1] T. A. McDonagh *et al.*, “2021 ESC Guidelines for the diagnosis and treatment of acute and chronic heart failure,” *European Heart Journal*, vol. 42, no. 36, pp. 3599–3726, Sep. 2021, doi: 10.1093/eurheartj/ehab368.
- [2] M. Pahuja, J. Hernandez-Montfort, E. H. Whitehead, M. Kawabori, and N. K. Kapur, “Device profile of the Impella 5.0 and 5.5 system for mechanical circulatory support for patients with cardiogenic shock: overview of its safety and efficacy,” *Expert Review of Medical Devices*, vol. 19, no. 1, pp. 1–10, Jan. 2022, doi: 10.1080/17434440.2022.2015323.
- [3] W. G. Cohen *et al.*, “Extended Support With the Impella 5.5: Transplant, ECMO, and Complications,” *ASAIO Journal*, vol. Publish Ahead of Print, Apr. 2023, doi: 10.1097/MAT.0000000000001931.
- [4] J. Schultz *et al.*, “Axillary or Subclavian Impella 5.0 Support in Cardiogenic Shock: A Systematic Review and Meta-analysis,” *ASAIO J*, vol. 68, no. 2, pp. 233–238, Feb. 2022, doi: 10.1097/MAT.0000000000001452.
- [5] A. M. Bernhardt *et al.*, “First in man evaluation of a novel circulatory support device: Early experience with the Impella 5.5 after CE mark approval in Germany,” *The Journal of Heart and Lung Transplantation*, vol. 40, no. 8, pp. 850–855, Aug. 2021, doi: 10.1016/j.healun.2021.04.001.
- [6] G. Nersesian *et al.*, “Propensity score-based analysis of 30-day survival in cardiogenic shock patients supported with different microaxial left ventricular assist devices,” *Journal of Cardiac Surgery*, vol. 36, no. 11, pp. 4141–4152, Nov. 2021, doi: 10.1111/jocs.15932.
- [7] K. G. Vargas *et al.*, “Impella in cardiogenic shock following acute myocardial infarction: a systematic review and meta-analysis,” *Wien Klin Wochenschr*, vol. 132, no. 23–24, pp. 716–725, Dec. 2020, doi: 10.1007/s00508-020-01712-y.
- [8] M. Iannaccone *et al.*, “Short term outcomes of Impella in cardiogenic shock: A review and meta-analysis of observational studies,” *International Journal of Cardiology*, vol. 324, pp. 44–51, Feb. 2021, doi: 10.1016/j.ijcard.2020.09.044.
- [9] G. Batsides, J. Massaro, A. Cheung, E. Soltesz, D. Ramzy, and M. B. Anderson, “Outcomes of Impella 5.0 in Cardiogenic Shock: A Systematic Review and Meta-analysis,” *Innovations (Phila)*, vol. 13, no. 4, pp. 254–260, Jul. 2018, doi: 10.1097/IMI.0000000000000535.
- [10] V. Ardito, L. Sarucanian, C. Rognoni, M. Pieri, A. M. Scandroglio, and R. Tarricone, “Impella Versus VA-ECMO for Patients with Cardiogenic Shock: Comprehensive Systematic Literature Review and Meta-Analyses,” *JCDD*, vol. 10, no. 4, p. 158, Apr. 2023, doi: 10.3390/jcdd10040158.
- [11] S. Ahmad *et al.*, “Impella Versus Extracorporeal Membranous Oxygenation (ECMO) for Cardiogenic Shock: A Systematic Review and Meta-analysis,” *Current Problems in Cardiology*, vol. 48, no. 1, p. 101427, Jan. 2023, doi: 10.1016/j.cpcardiol.2022.101427.
- [12] Z. R. Affas, G. G. Touza, and S. Affas, “A Meta-Analysis Comparing Venoarterial (VA) Extracorporeal Membrane Oxygenation (ECMO) to Impella for Acute Right Ventricle Failure,” *Cureus*, Nov. 2021, doi: 10.7759/cureus.19622.
- [13] W. Abusnina *et al.*, “IMPELLA VERSUS EXTRACORPOREAL MEMBRANE OXYGENATION IN CARDIOGENIC SHOCK: A SYSTEMATIC REVIEW AND META-ANALYSIS,” *Shock*, vol. 58, no. 5, pp. 349–357, Nov. 2022, doi: 10.1097/SHK.0000000000001996.
- [14] “Is There Randomized Controlled Trial Data Available for Impella® Heart Pump Use in Cardiogenic Shock?” Abiomed, 2020. [Online]. Available: <https://www.heartrecovery.com/education/education-library/faq-rct-data-impella-cardiogenic-shock>
- [15] “Regulation on Health Technology Assessment.” European Commission. [Online]. Available: [https://health.ec.europa.eu/health-technology-assessment/regulation-health-technology-assessment\\_en#:~:text=The%20new%20framework%20covers%20joint,applies%20as%20of%20January%202025](https://health.ec.europa.eu/health-technology-assessment/regulation-health-technology-assessment_en#:~:text=The%20new%20framework%20covers%20joint,applies%20as%20of%20January%202025)
- [16] M. Drummond, R. Tarricone, and A. Torbica, “European union regulation of health technology assessment: what is required for it to succeed?,” *Eur J Health Econ*, pp. s10198-022-01458–6, Mar. 2022, doi: 10.1007/s10198-022-01458-6.

- 1  
2  
3 [17] R. Tarricone *et al.*, “Establishing a national HTA program for medical devices in Italy: Overhauling a  
4 fragmented system to ensure value and equal access to new medical technologies,” *Health Policy*, vol.  
5 125, no. 5, pp. 602–608, May 2021, doi: 10.1016/j.healthpol.2021.03.003.
- 6 [18] “Harmonization Of Health Technology Assessment Across The European Union: Lessons For The  
7 United States.” Dec. 02, 2021. doi: 10.1377/forefront.20211130.24462.
- 8 [19] J. B. Roos *et al.*, “The cost-effectiveness of a new percutaneous ventricular assist device for high-risk  
9 PCI patients: mid-stage evaluation from the European perspective,” *Journal of Medical Economics*,  
10 vol. 16, no. 3, pp. 381–390, Mar. 2013, doi: 10.3111/13696998.2012.762004.
- 11 [20] A. P. Shah *et al.*, “Clinical and economic effectiveness of percutaneous ventricular assist devices for  
12 high-risk patients undergoing percutaneous coronary intervention,” *J Invasive Cardiol*, vol. 27, no. 3,  
13 pp. 148–154, Mar. 2015.
- 14 [21] Health Quality Ontario, “Percutaneous Ventricular Assist Devices: A Health Technology Assessment,”  
15 *Ont Health Technol Assess Ser*, vol. 17, no. 2, pp. 1–97, 2017.
- 16 [22] A. Chieffo *et al.*, “Observational multicentre registry of patients treated with IMPella mechanical  
17 circulatory support device in Italy: the IMP-IT registry,” *EuroIntervention*, vol. 15, no. 15, pp. e1343–  
18 e1350, Feb. 2020, doi: 10.4244/EIJ-D-19-00428.
- 19 [23] M. B. Ancona *et al.*, “Device-related complications after Impella mechanical circulatory support  
20 implantation: an IMP-IT observational multicentre registry substudy,” *European Heart Journal. Acute  
21 Cardiovascular Care*, vol. 10, no. 9, pp. 999–1006, Dec. 2021, doi: 10.1093/ehjacc/zuab051.
- 22 [24] V. Tarzia *et al.*, “Prognosticating Mortality of Primary Cardiogenic Shock Requiring Extracorporeal  
23 Life Support: The RESCUE Score,” *Current Problems in Cardiology*, vol. 48, no. 4, p. 101554, Apr.  
24 2023, doi: 10.1016/j.cpcardiol.2022.101554.
- 25 [25] V. Tarzia *et al.*, “Extracorporeal life support in cardiogenic shock: Impact of acute versus chronic  
26 etiology on outcome,” *The Journal of Thoracic and Cardiovascular Surgery*, vol. 150, no. 2, pp. 333–  
27 340, Aug. 2015, doi: 10.1016/j.jtcvs.2015.02.043.
- 28 [26] R. Mahajan *et al.*, “Standardized Protocol Items Recommendations for Observational Studies  
29 (SPIROS) for Observational Study Protocol Reporting Guidelines: Protocol for a Delphi Study,” *JMIR  
30 Res Protoc*, vol. 9, no. 10, p. e17864, Oct. 2020, doi: 10.2196/17864.
- 31 [27] R. L. Kormos *et al.*, “Updated definitions of adverse events for trials and registries of mechanical  
32 circulatory support: A consensus statement of the mechanical circulatory support academic research  
33 consortium,” *The Journal of Heart and Lung Transplantation*, vol. 39, no. 8, pp. 735–750, Aug. 2020,  
34 doi: 10.1016/j.healun.2020.03.010.
- 35 [28] B. Niemann *et al.*, “Rationale and Initiative of the Impella in Cardiac Surgery (ImCarS) Register  
36 Platform,” *Thorac Cardiovasc Surg*, vol. 70, no. 06, pp. 458–466, Sep. 2022, doi: 10.1055/s-0042-  
37 1749686.
- 38 [29] M. Drummond, *Methods for the Economic Evaluation of Health Care Programmes*, OUP Oxford.  
39 2015.
- 40 [30] D. Husereau *et al.*, “Consolidated Health Economic Evaluation Reporting Standards (CHEERS)—  
41 Explanation and Elaboration: A Report of the ISPOR Health Economic Evaluation Publication  
42 Guidelines Good Reporting Practices Task Force,” *Value in Health*, vol. 16, no. 2, pp. 231–250, Mar.  
43 2013, doi: 10.1016/j.jval.2013.02.002.
- 44 [31] D. Husereau *et al.*, “Consolidated Health Economic Evaluation Reporting Standards (CHEERS) 2022  
45 Explanation and Elaboration: A Report of the ISPOR CHEERS II Good Practices Task Force,” *Value  
46 in Health*, vol. 25, no. 1, pp. 10–31, Jan. 2022, doi: 10.1016/j.jval.2021.10.008.
- 47  
48  
49  
50  
51  
52  
53  
54  
55  
56  
57  
58  
59  
60

## Supplementary Materials

### Supplementary Materials 1. Clinical parameters

Table 1 reports the comprehensive list of clinical variables to be collected for both prospective and retrospective patients. Specifically, the relevant variables for the Impella and ECMO groups are specified, along with the timing for measurements during the observation period.

| Patients' characteristics                     | Target patients |            | Timing of measurement |  |  |  |
|-----------------------------------------------|-----------------|------------|-----------------------|--|--|--|
|                                               | Impella group   | ECMO group | T0 (Baseline)         |  |  |  |
| Age (years)                                   | X               | X          | X                     |  |  |  |
| Sex (male/female)                             | X               | X          | X                     |  |  |  |
| BMI (kg/m <sup>2</sup> )                      | X               | X          | X                     |  |  |  |
| Arterial Hypertension (yes/no)                | X               | X          | X                     |  |  |  |
| Diabetes Mellitus (yes/no)                    | X               | X          | X                     |  |  |  |
| Chronic kidney disease (yes/no)               | X               | X          | X                     |  |  |  |
| Peripheral artery disease(yes/no)             | X               | X          | X                     |  |  |  |
| ICD/CRT (yes/no)                              | X               | X          | X                     |  |  |  |
| Previous PTCA (yes/no)                        | X               | X          | X                     |  |  |  |
| Previous CABG (yes/no)                        | X               | X          | X                     |  |  |  |
| Chronic heart failure (yes/no)                | X               | X          | X                     |  |  |  |
| <i>Cause of acute heart failure:</i>          |                 |            |                       |  |  |  |
| *Acute coronary syndrome (yes/no)             | X               | X          | X                     |  |  |  |
| *Myocarditis (yes/no)                         | X               | X          | X                     |  |  |  |
| *End stage dilatative cardiomyopathy (yes/no) | X               | X          | X                     |  |  |  |
| *Arrhythmia/ arrhythmic storm(yes/no)         | X               | X          | X                     |  |  |  |
| *Other (specify)                              | X               | X          | X                     |  |  |  |
| <i>Phenotype of cardiogenic shock:</i>        |                 |            |                       |  |  |  |
| * LV dominant (yes/no)                        | X               | X          | X                     |  |  |  |
| *RV isolated (yes/no)                         | X               | X          | X                     |  |  |  |
| * Biventricular failure(yes/no)               | X               | X          | X                     |  |  |  |
| Onset of shock (hours)                        | X               | X          | X                     |  |  |  |
| <i>Hemodynamic presentation of shock:</i>     |                 |            |                       |  |  |  |
| * Wet and cold (classic CS) (yes/no)          | X               | X          | X                     |  |  |  |

|                                                                 |                  |               |               |  |  |  |
|-----------------------------------------------------------------|------------------|---------------|---------------|--|--|--|
| * Wet and warm (vasodilatory CS)<br>(yes/no)                    | X                | X             | X             |  |  |  |
| * Dry and cold (euvolemic CS)<br>(yes/no)                       | X                | X             | X             |  |  |  |
| Revascularization procedure with<br>stent implantation (yes/no) | X                | X             | X             |  |  |  |
| Cardiac arrest(yes/no)                                          | X                | X             | X             |  |  |  |
| eGFR (ml/min/m2)                                                | X                | X             | X             |  |  |  |
| AKI requiring CRRT yes/no)                                      | X                | X             | X             |  |  |  |
| Mechanical ventilation yes/no)                                  | X                | X             | X             |  |  |  |
| Days of mechanical ventilation<br>yes/no)                       | X                | X             | X             |  |  |  |
| <b>Mortality risk score</b>                                     | Impella<br>group | ECMO<br>group | T0 (Baseline) |  |  |  |
| NYHA                                                            | X                | X             | X             |  |  |  |
| INTERMACS score                                                 | X                | X             | X             |  |  |  |
| SCAI class                                                      | X                | X             | X             |  |  |  |
| CARDshock score (see below)                                     | X                | X             | X             |  |  |  |
| RESCUE SCORE                                                    | X                | X             | X             |  |  |  |
| SAVE score                                                      | X                | X             | X             |  |  |  |
| <b>MCS strategy and data</b>                                    | Impella<br>group | ECMO<br>group | Event (Y/N)   |  |  |  |
| <i>Implantation pathway:</i>                                    |                  |               |               |  |  |  |
| * MCS escalation (yes/no)                                       | X                | X             | X             |  |  |  |
| * MCS de-escalation (yes/no)                                    | X                | X             | X             |  |  |  |
| * First support (yes/no)                                        | X                | X             | X             |  |  |  |
| <i>Device implantation pre PCI</i><br>(yes/no)                  | X                | X             | X             |  |  |  |
| <i>Device implantation post PCI</i><br>(yes/no)                 | X                | X             | X             |  |  |  |
| <i>Implantation strategy<sup>1</sup>:</i>                       |                  |               |               |  |  |  |
| * Bridge to recovery (yes/no)                                   | X                | X             | X             |  |  |  |
| * Bridge to LVAD (yes/no)                                       | X                | X             | X             |  |  |  |
| * Bridge to transplant (yes/no)                                 | X                | X             | X             |  |  |  |
| * Bridge to candidacy (yes/no)                                  | X                | X             | X             |  |  |  |
| <i>Implantation route:</i>                                      |                  |               |               |  |  |  |
| *Axillar (yes/no)                                               | X                | X             | X             |  |  |  |
| * Femoral (yes/no)                                              | X                | X             | X             |  |  |  |
| Successful implantation (yes/no)                                | X                | X             | X             |  |  |  |

<sup>1</sup> Typically reassessed also at the end of the patient journey, as it might be subject to changes from the original plan



1  
2  
3  
4  
5  
6  
7  
8  
9  
10  
11  
12  
13  
14  
15  
16  
17  
18  
19  
20  
21  
22  
23  
24  
25  
26  
27  
28  
29  
30  
31  
32  
33  
34  
35  
36  
37  
38  
39  
40  
41  
42  
43  
44  
45  
46  
47  
48  
49  
50  
51  
52  
53  
54  
55  
56  
57  
58  
59  
60

| Need for surgical implant (yes/no)                            | X             | X          | X                            |                                     |                           |                                        |
|---------------------------------------------------------------|---------------|------------|------------------------------|-------------------------------------|---------------------------|----------------------------------------|
| Duration of implantation (min)                                | X             | X          | Y, minutes                   |                                     |                           |                                        |
| <b>Hemodynamic and Lab Parameters Trend</b>                   | Impella group | ECMO group | T0 (Baseline)                | 24 h post implantation              | 48-72 h post implantation | First measurement after device removal |
| Mean arterial pressure (mmHg)                                 | X             | X          | X                            | X                                   | X                         | X                                      |
| Systolic arterial pressure (mmHg)                             | X             | X          | X                            | X                                   | X                         | X                                      |
| Heart rate (bpm)                                              | X             | X          | X                            | X                                   | X                         | X                                      |
| CVP (mmHg)                                                    | X             | X          | X                            | X                                   | X                         | X                                      |
| CI (l/min/mq)                                                 | X             | X          | X                            | X                                   | X                         | X                                      |
| PCWP (mmHg)                                                   | X             | X          | X                            | X                                   | X                         | X                                      |
| SvO2 (%)                                                      | X             | X          | X                            | X                                   | X                         | X                                      |
| RVSWI (g/m/beat/m <sup>2</sup> )                              | X             | X          | X                            | X                                   | X                         | X                                      |
| Creatinine (mg/dl)                                            | X             | X          | X                            | X                                   | X                         | X                                      |
| Lactates (mmol/L)                                             | X             | X          | X                            | X                                   | X                         | X                                      |
| Troponin (pg/ml)                                              | X             | X          | X                            | X                                   | X                         | X                                      |
| Inotropic score                                               | X             | X          | X                            | X                                   | X                         | X                                      |
| NT-proBNP (ng/L)                                              | X             | X          | X                            | X                                   | X                         | X                                      |
| Platelets (per microliter)                                    | X             | X          | X                            | X                                   | X                         | X                                      |
| D-dimers (µg/mL)                                              | X             | X          | X                            | X                                   | X                         | X                                      |
| Bilirubin (mg/dl)                                             | X             | X          | X                            | X                                   | X                         | X                                      |
| LV EF (%)                                                     | X             | X          | X                            | X                                   | X                         | X                                      |
| RV EF (%)                                                     | X             | X          | X                            | X                                   | X                         | X                                      |
| Mechanical ventilation (yes/no)                               | X             | X          | X                            | X                                   | X                         | X                                      |
| <b>Safety in-hosp complications</b>                           | Impella group | ECMO group | Event during support(yes/no) | Eventual comments/event description |                           |                                        |
| <i>Bleeding (and site):</i>                                   |               |            |                              |                                     |                           |                                        |
| *Major (yes/no)                                               | X             | X          |                              |                                     |                           |                                        |
| *Moderate (yes/no)                                            | X             | X          |                              |                                     |                           |                                        |
| *Minor (yes/no)                                               | X             | X          |                              |                                     |                           |                                        |
| Bleeding requiring surgery (yes/no)                           | X             | X          |                              |                                     |                           |                                        |
| Bleeding from Impella (ECMO insertion site (yes/no)           | X             | X          |                              |                                     |                           |                                        |
| Limb ischemia (yes/no)                                        | X             | X          |                              |                                     |                           |                                        |
| Vascular complication requiring intervention/surgery (yes/no) | X             | X          |                              |                                     |                           |                                        |
| Ischemic stroke (yes/no)                                      | X             | X          |                              |                                     |                           |                                        |
| Device malfunction(yes/no)                                    | X             | X          |                              |                                     |                           |                                        |
| LV perforation (yes/no)                                       | X             |            |                              |                                     |                           |                                        |

|                                                          |               |            |                |                                     |
|----------------------------------------------------------|---------------|------------|----------------|-------------------------------------|
| Aortic valve injury (yes/no)                             | X             |            |                |                                     |
| Mitral valve injury (yes/no)                             | X             |            |                |                                     |
| Lesion to other intracardiac structure (yes/no)          | X             | X          |                |                                     |
| aortic dissection (yes/no)                               | X             | X          |                |                                     |
| Other device related injury (yes/no)                     | X             | X          |                |                                     |
| Major Hemolysis (yes/no)                                 | X             | X          |                |                                     |
| Minor Hemolysis (yes/no)                                 | X             | X          |                |                                     |
| AKI requiring CRRT (yes/no)                              | X             | X          |                |                                     |
| Sepsis (yes/no)                                          | X             | X          |                |                                     |
| Extracorporeal purification (i.e. Cytosorb) (yes/no)     |               |            |                |                                     |
| EC transfusion, numbers of unit                          | X             | X          |                |                                     |
| FFP transfusion, numbers of unit                         | X             | X          |                |                                     |
| PLT transfusion, numbers of unit                         | X             | X          |                |                                     |
| <b>Device related outcomes</b>                           | Impella group | ECMO group | Variable       | Eventual comments/event description |
| Duration of MCS support (days)                           | X             | X          |                |                                     |
| mobilization (chair) with MCS and physiotherapy (yes/no) | X             | X          |                |                                     |
| mobilization (walk) with MCS and physiotherapy (yes/no)  | X             | X          |                |                                     |
| Major device malfunction (yes/no)                        | X             | X          |                |                                     |
| Device exchange (yes/no)                                 | X             | X          |                |                                     |
| Reason for device exchange                               | X             | X          |                |                                     |
| <b>Survival and cardiac outcomes</b>                     | Impella group | ECMO group | Event (yes/no) | Eventual comments/event description |
| 30-day mortality (yes/no)                                | X             | X          |                |                                     |
| ICU mortality (yes/no)                                   | X             | X          |                |                                     |
| Hospital mortality (yes/no)                              | X             | X          |                |                                     |
| Survival to next therapy (yes/no)                        | X             | X          |                |                                     |
| Weaning from MCS (yes/no)                                | X             | X          |                |                                     |
| Myocardial recovery (yes/no)                             | X             | X          |                |                                     |
| Bridge to LVAD (yes/no)                                  | X             | X          |                |                                     |
| Bridge to Transplant (yes/no)                            | X             | X          |                |                                     |
| Cause of death                                           | X             | X          |                |                                     |
| Duration of ICU stay, days                               | X             | X          |                |                                     |
| Duration of hospital stay, days                          | X             | X          |                |                                     |
| Sequelae of hospital complication at discharge (yes/no)  | X             | X          |                |                                     |

1  
2  
3  
4  
5  
6  
7  
8  
9  
10  
11  
12  
13  
14  
15  
16  
17  
18  
19  
20  
21  
22  
23  
24  
25  
26  
27  
28  
29  
30  
31  
32  
33  
34  
35  
36  
37  
38  
39  
40  
41  
42  
43  
44  
45  
46  
47  
48  
49  
50  
51  
52  
53  
54  
55  
56  
57  
58  
59  
60

|                                                 |   |   |  |  |
|-------------------------------------------------|---|---|--|--|
| Details of sequelae                             | X | X |  |  |
| Duration of mechanical ventilation(days)        | X | X |  |  |
| Tracheostomy (yes/no)                           | X | X |  |  |
| Able to perform self-care at discharge (yes/no) | X | X |  |  |
| Able to return to work at discharge (yes/no)    | X | X |  |  |

### CARDshock score calculation:

Age > 75 years (yes/no)

Confusion at presentation (yes/no)

Prior myocardial infarction of CABG (yes/no)

Acute coronary syndrome ethology (yes/no)

Blood lactate level (<2/2-4/>4)

eGRF (>60/30-60/<30 ml/min/m<sup>2</sup>)

To the eCRF section dedicated to DTI, it should be added bivalirudin.

It should be added a section that recaps the types of antibiotics use and the duration of therapy (to estimate costs):

| Antibiotic class                               | Use (yes/no) | Duration of therapy (days) |
|------------------------------------------------|--------------|----------------------------|
| Cephalosporines (yes/no)                       |              |                            |
| Pennicillins (yes/no)                          |              |                            |
| Penicillins (yes/no)                           |              |                            |
| Glycopeptides (yes/no)                         |              |                            |
| Fluoroquinolones (yes/no)                      |              |                            |
| Macrolides (yes/no)                            |              |                            |
| Carbapenems (yes/no)                           |              |                            |
| Lyncosamids (yes/no)                           |              |                            |
| Aminoglicosides (yes/no)                       |              |                            |
| Tetracyclins (yes/no)                          |              |                            |
| Sulfonamides (yes/no)                          |              |                            |
| Oxazolidinones (yes/no)                        |              |                            |
| Polypeptides (yes/no)                          |              |                            |
| Other (yes/no) – specify class                 |              |                            |
| Second line antibiotic therapy needed (yes/no) |              |                            |

## Supplementary Material 2. Healthcare resource use variables (hospital data)

The health services performed to follow-up the patients will be measured by recording the number of assessments performed over the study observation period. These data represent the items necessary to determine the direct healthcare costs incurred by the healthcare system which will be included in the Cost Effectiveness Analysis (CEA). These data are normally traced by hospital records (e.g., eHRs, administrative data), and should be only transferred into the Register platform from treating clinicians. These data are not to be asked to patients. These variables will be measured throughout the patient's the hospital stay. In this study, the following data will be recorded by the doctors during the 6-month follow-up period.

### Section 1. Hospitalizations

#### 1.1 Reason for hospitalization

- Heart failure: yes/no/unknown + number
- Ictus ischemic: yes/no/unknown + number
- Ictus hemorrhagic: yes/no/unknown + number
- Bleeding: yes/no/unknown + number
- Renal failure: yes/no/unknown + number
- Respiratory failure: yes/no/unknown + number
- Arrhythmia: yes/no/unknown + number
- Other (please specify): \_\_\_\_\_ [maximum 5 reasons]

1.2 Number of bed-days in regular ward (e.g., cardiac care ward, other): n (units)

1.3 Number of days in ICU (i.e., intensive care unit): n (units)

#### 1.4 Procedures performed (0 if no procedures are performed)

- Blood transfusion: yes/no/unknown + number
- Dialysis: yes/no/unknown + number
- Ventilatory support: yes/no/unknown + number
- Surgery: yes/no/unknown + number
- Type of surgery (qualitative comment)
- Local interventions: Gastroscopy: yes/no/unknown + number
- Local interventions: Thoracic drainage: yes/no/unknown + number
- Local interventions: Endoscopy: yes/no/unknown + number
- Local interventions: other (please specify name and units): \_\_\_\_\_
- Physiotherapy: yes/no; nr. of weekly cycles: n (units)
- Ambulatory visit: n (units)

#### 1.5 Exams

- CT Scan: yes/no; n (units)
- MRI: yes/no; n (units)
- Angiography: yes/no; n (units)
- Other (please specify): \_\_\_\_\_

### Section 2: Pharmaceutical consumption during hospitalization

1  
2  
3 2.1 Drugs used  
4

- 5 • Antibiotics: yes/no; days on antibiotics (units)  
6

7 2.2 Medical devices used

- 8 • Nr. of Impella devices used (units)  
9 • Nr. of ECMO devices used (units)  
10 • Dialysis: yes/no  
11 • Extracorporeal purification: yes/no  
12     ○ (If yes) Cytosorb: yes/no  
13     ○ (If yes) Other (please specify): yes/no + name  
14 • Other (please specify) \_\_\_\_\_  
15  
16

17 **Section 3: Emergency department**

- 18  
19 • ER access for heart failure-related symptoms: yes/no  
20 • ER access with no subsequent hospitalization: yes/no + number  
21 • ER access leading to hospitalization: yes/no + number  
22 • Use of the ambulance services: yes/no  
23  
24

25 **Section 4: Other relevant information**

- 26 • Recovery time needed to go back to work or to “normal life” (from clinician’s perspective): 30 days/60  
27 days/120 days/NA  
28  
29  
30  
31  
32  
33  
34  
35  
36  
37  
38  
39  
40  
41  
42  
43  
44  
45  
46  
47  
48  
49  
50  
51  
52  
53  
54  
55  
56  
57  
58  
59  
60

### Supplementary Material 3. Patient questionnaire to assess the societal impact of the disease

The following questionnaire will be answered by patients. It has been translated in Italian and will be administered to patients in Italian, however it will be inserted in the Register in English. Both Italian and English versions are provided hereafter. The questionnaire is comprised of two parts:

- A. baseline questionnaire, to be administered at signature of informed consent/at ICU-discharge (typically in-person);
- B. follow-up questionnaire, to be administered at 6 months, typically over the phone.

\*\*\*\*\*

#### A. Baseline questionnaire

##### 1. Employment status:

###### 1.1 What is your current employment status?

If employee:

- factory worker
- employee
- manager, director

If self-employed:

- businessman/woman, freelancer
- other self-employed

If non-professional status:

- retired
- student
- housewife
- other, not employed

###### 1.2 If you are a worker, what is your employment status?

- Full time
- Part-time: 20 hours/week
- Part-time: 24 hours/week
- Part-time: 30 hours/week
- Part-time: 36 hours/week

##### 2. Travel information:

###### 2.1 How much do you spend on average to reach the hospital?

€ \_\_\_\_\_

###### 2.2 How do you typically reach the hospital?

- By car
- By public transport
- By taxi

- 1  
2  
3 • Other (specify)  
4  
5

6 \*\*\*  
7

8 B. Follow-up questionnaire  
9

10 1. Out-of-pocket (OOP) expenses information:

11 1.1 In the past 3 months, did you sustain any expense due to cardiogenic shock?

12 Yes

13 No

14 1.2 If yes, what were the healthcare expenses related to?

15 Medical care

- 16 • Specialty visits/exams (e.g., second opinion)  
17 • Drugs (e.g., non-reimbursable drugs, supplements)  
18 • Psychological support  
19 • Other (specify)  
20  
21  
22

23  
24 1.3 If yes, how much did you spend for each health event?

25 € \_\_\_\_\_

26 € \_\_\_\_\_

27 € \_\_\_\_\_  
28  
29

30 2. Hospitalizations outside the clinical site of study:

31 2.1 In the past 3 months, were you hospitalized in a different hospital from this one?

- 32 • Yes  
33 • No  
34  
35

36 2.2 If yes, please indicate the reason: \_\_\_\_\_ and the hospitalization duration (days):  
37 \_\_\_\_\_  
38

39 2.3 Did you use emergency services?

- 40 • Emergency department  
41 • Ambulance  
42 • None  
43  
44  
45

46 2.4 Did you pay for any of these services?

- 47 • Yes  
48 • No  
49  
50

51 2.5 If yes, how much did you spend?

52 € \_\_\_\_\_  
53  
54

55 3. Informal or formal assistance:

56 3.1 Who gave you informal assistance following your episode of cardiogenic shock? If more than one person,  
57 please indicate the one who gives you the most help.

- 58 • No one  
59 • Spouse/cohabitant/partner  
60

- Child
- Parent
- Brother/Sister
- Friend
- Other

3.2 If you indicated that someone assists you, how many days does this person assist you, on average, each month, due to issues related to cardiogenic shock? If you want to indicate half a day, write 0,5.

\_\_\_\_\_ days

3.3 If you indicated that someone assists you, considering the total time you receive as informal assistance from this person, please indicate what percentage you are assisted in the following activities (the sum of the percentages must make 100%):

| Activities                                                                                              | % |
|---------------------------------------------------------------------------------------------------------|---|
| Nursing activities (eg. drugs administration) and personal care (eg. getting dressed, personal washing) |   |
| Daily activities (eg. work, study, house works, family activities, entertainment, travel)               |   |
| Psychological support                                                                                   |   |

3.4 In the past 3 months, because of complications following your case of cardiogenic shock, have you turned to paid contractors/workers for household help (e.g., babysitter, domestic helper)? (1 answer only)

1. No
2. Yes; How much did you spend? \_\_\_\_\_ €

4. Limitations caused by the pathology:

4.1 In the past 3 months, approximately how many days of work (professional or home) have you lost due to problems related to cardiogenic shock (if half a day, indicate 0.5)? Exclude any days you have missed for visits, examinations or hospitalizations.

\_\_\_\_\_ days

4.2 In the past 3 months, how many days have you missed out on activities related to your personal and social life (e.g., going out with friends, hobbies, sports, family activities, etc.) due to problems related to cardiogenic shock (if half a day, indicate 0.5)? Exclude any days you have missed for visits, examinations or hospitalizations.

\_\_\_\_\_ days



#### **Supplementary Material 4. Patient questionnaire to assess quality of life (EQ-5D-5L)**

The EQ-5D-5L questionnaire will be administered to patients included prospectively in the study. The Italian validated version of the questionnaire will be employed. The questionnaire will be administered in a paper-based format, with the clinicians supporting the administration phase (e.g., reading out loud the questions to the patients and making their answers). The questionnaire will be administered to patients in Italian, and inputted in English in the Register. The questionnaire will be administered in three time points following Impella or ECMO implantation: i) after 7 days (i.e., while the patient is still in the hospital); ii) after 30 days; iii) after 6 months of follow-up. A formal request to use the EQ-5D-5L questionnaire has been submitted via the official website (ID: 48771).

### **Questionario sulla salute**

#### **Versione italiana per l'Italia**

*(Italian version for Italy)*

#### **VERSIONE PER LA SOMMINISTRAZIONE DA PARTE DELL'INTERVISTATORE/INTERVISTATRICE**

---

*Nota per l'intervistatore/intervistatrice: sebbene si debba tenere conto del particolare stile di conversazione dell'intervistatore/intervistatrice, il testo delle istruzioni del questionario dovrà essere seguito il più fedelmente possibile. Nel caso del sistema descrittivo EQ-5D-5L a pagina 2 del questionario, il testo deve essere seguito fedelmente.*

*Se l'intervistato/a ha difficoltà nello scegliere una risposta, o chiede chiarimenti, l'intervistatore/intervistatrice dovrà ripetere la domanda parola per parola e chiedere all'intervistato/a di rispondere in un modo che sia il più vicino ai suoi pensieri sulla sua salute oggi.*

---

#### **INTRODUZIONE**

*(Nota per l'intervistatore/intervistatrice: legga quanto segue all'intervistato/a.)*

1  
2  
3  
4  
5 **Desideriamo conoscere ciò che pensa della sua salute. Le spiegherò cosa fare man mano che procedo,**  
6 **ma mi interrompa pure nel caso in cui non dovesse comprendere qualcosa o ritenesse che qualcosa**  
7 **non le fosse chiaro. Non ci sono risposte giuste o sbagliate. Siamo interessati solo al suo personale**  
8 **punto di vista.**  
9

10  
11  
12 **Per prima cosa, leggerò alcune domande. Ogni domanda ha una scelta di cinque risposte. Mi dica**  
13 **quale risposta descrive meglio la sua salute OGGI.**  
14

15  
16  
17 **Non scelga più di una risposta per ogni gruppo di domande.**  
18

19  
20 *(Nota per l'intervistatore/intervistatrice: per prima cosa, legga tutte e cinque le opzioni per ogni domanda.*  
21 *Quindi, chieda all'intervistato/a di scegliere quella che pensa si applichi a se stesso/a. Ripeta la domanda*  
22 *e le opzioni se necessario. Contrassegni la casella appropriata sotto ciascun titolo. Potrebbe essere*  
23 *necessario ricordare regolarmente all'intervistato/a che l'intervallo di tempo è OGGI.)*  
24  
25  
26  
27  
28  
29  
30  
31  
32  
33  
34  
35  
36  
37  
38  
39  
40  
41  
42  
43  
44  
45  
46  
47  
48  
49  
50  
51  
52  
53  
54  
55  
56  
57  
58  
59  
60

1  
2  
3  
4 **SISTEMA DESCRITTIVO EQ-5D**  
5

6 **Per prima cosa, vorremmo chiederle della CAPACITÀ DI MOVIMENTO. Direbbe che:**  
7

- 8 1. Non ha difficoltà nel camminare   
9 2. Ha lievi difficoltà nel camminare   
10 3. Ha moderate difficoltà nel camminare   
11 4. Ha gravi difficoltà nel camminare   
12 5. Non è in grado di camminare   
13
- 

14  
15 **Quindi, vorremmo chiederle della CURA DELLA PERSONA. Direbbe che:**  
16

- 17 1. Non ha difficoltà nel lavarsi o vestirsi   
18 2. Ha lievi difficoltà nel lavarsi o vestirsi   
19 3. Ha moderate difficoltà nel lavarsi o vestirsi   
20 4. Ha gravi difficoltà nel lavarsi o vestirsi   
21 5. Non è in grado di lavarsi o vestirsi   
22
- 

23  
24 **Quindi, vorremmo chiederle delle ATTIVITÀ ABITUALI, per es. lavoro, studio, lavori**  
25 **domestici, attività familiari o di svago. Direbbe che:**  
26

- 27 1. Non ha difficoltà nello svolgimento delle attività abituali   
28 2. Ha lievi difficoltà nello svolgimento delle attività abituali   
29 3. Ha moderate difficoltà nello svolgimento delle attività abituali   
30 4. Ha gravi difficoltà nello svolgimento delle attività abituali   
31 5. Non è in grado di svolgere le attività abituali   
32
- 

33  
34 **Quindi, vorremmo chiederle quanto DOLORE O FASTIDIO prova. Direbbe che:**  
35

- 36 1. Non prova alcun dolore o fastidio   
37 2. Prova lieve dolore o fastidio   
38 3. Prova moderato dolore o fastidio   
39 4. Prova grave dolore o fastidio   
40 5. Prova estremo dolore o fastidio   
41
- 

42  
43 **Infine, vorremmo chiederle dell'ANSIA O DEPRESSIONE. Direbbe che:**  
44

- 45 1. Non è ansioso/a o depresso/a   
46 2. È lievemente ansioso/a o depresso/a   
47 3. È moderatamente ansioso/a o depresso/a   
48 4. È gravemente ansioso/a o depresso/a   
49 5. È estremamente ansioso/a o depresso/a   
50
- 
- 51  
52  
53  
54  
55  
56  
57  
58  
59  
60

**EQ-5D VAS**

- Adesso, vorremmo sapere quanto è buona o cattiva la sua salute OGGI.
- Vorremmo che immaginasse una linea verticale numerata da 0 a 100.  
*(Nota per l'intervistatore/intervistatrice: in caso di intervista faccia a faccia, mostrare all'intervistato/a la linea VAS.)*
- 100 in cima alla linea rappresenta la migliore salute che può immaginare.
- 0 in fondo alla linea rappresenta la peggiore salute che può immaginare.
- Vorrei che ora mi indicasse un punto sulla linea per indicare com'è la sua salute OGGI.  
*(Nota per l'intervistatore/intervistatrice: contrassegni la linea nel punto che indica la salute dell'intervistato/a OGGI. Ora, scriva il numero indicato sulla linea nella casella sottostante.)*

LA SALUTE DELL'INTERVISTATO/A OGGI =

**Grazie per il tempo dedicato a rispondere a queste domande.**

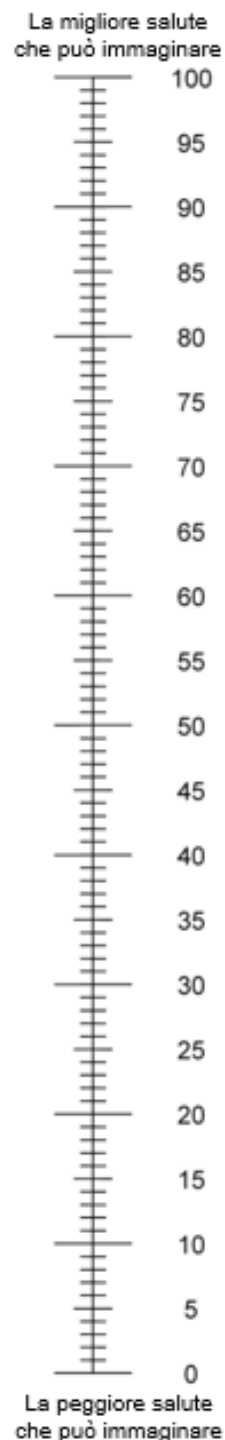

**SPIROS (Standardized Protocol Items: Recommendations for Observational Studies) checklist**

| Section and topic                   | Description / sub-categories                                                                                                                                                                                        | Addressed in the manuscript (Paragraph name) |
|-------------------------------------|---------------------------------------------------------------------------------------------------------------------------------------------------------------------------------------------------------------------|----------------------------------------------|
| <b>i) General information</b>       |                                                                                                                                                                                                                     |                                              |
| Title                               | Descriptive title identifying study design                                                                                                                                                                          | Title page                                   |
| Protocol version                    | Version or amendment number and date and summary of changes                                                                                                                                                         | NA                                           |
| Protocol summary                    | Brief summary of protocol research                                                                                                                                                                                  | Abstract                                     |
| Sponsor and partner institute name  | Name of sponsor and participating institutes (if applicable)                                                                                                                                                        | Title page; Funding                          |
| Investigators name                  | Name of principal and co investigators.                                                                                                                                                                             | Title page                                   |
| Affiliations of investigators       | Affiliated institutions of investigators                                                                                                                                                                            | Title page                                   |
| Principal researcher contact detail | Name, email address, affiliation of Principal researcher for correspondence                                                                                                                                         | Title page                                   |
| Table of content                    | Table of content                                                                                                                                                                                                    | NA                                           |
| Page number                         | Page number on each page of protocol                                                                                                                                                                                | Yes                                          |
| List of abbreviations               | A detailed List of all abbreviations used in protocol with full form.                                                                                                                                               | List of abbreviations                        |
| <b>ii) Introduction</b>             |                                                                                                                                                                                                                     |                                              |
| Background of study                 | Scientific background of study                                                                                                                                                                                      | Background                                   |
| Review of prior research            | Summary of all previous relevant research                                                                                                                                                                           | Background                                   |
| Rationale of study                  | Justification for conducting the study                                                                                                                                                                              | Background                                   |
| Aim                                 | Broader aims and specific objectives of the study                                                                                                                                                                   | Study objectives                             |
| Objective of study                  | Primary and secondary objectives of study                                                                                                                                                                           | Study objectives                             |
| Prespecified hypothesis             | Prespecified null or alternative hypothesis                                                                                                                                                                         | NA                                           |
| <b>iii) Methods</b>                 |                                                                                                                                                                                                                     |                                              |
| Study design                        | Description of type/design of study                                                                                                                                                                                 | Study design                                 |
| Study setting                       | Description of setting, locations, relevant dates, including periods of recruitment/survey, exposure, follow-up, and data collection.<br><br>Schedule of study procedure – Figure or table                          | The Impella Network                          |
| Sample size                         | Estimated number, calculation and assumptions<br><br>Power calculation                                                                                                                                              | Sample size                                  |
| Sampling procedure                  | Description of sampling strategy to ensure representativeness and control of potential bias                                                                                                                         | Study population                             |
| Participants                        | <b>Cohort study</b> —eligibility criteria, and the sources and methods of selection of participants. Describe methods of follow-up. For matched studies, give matching criteria and number of exposed and unexposed | Study population                             |

|                                               |                                                                                                                                                                                                                                                                                                                                                                                                               |                                                                                               |
|-----------------------------------------------|---------------------------------------------------------------------------------------------------------------------------------------------------------------------------------------------------------------------------------------------------------------------------------------------------------------------------------------------------------------------------------------------------------------|-----------------------------------------------------------------------------------------------|
|                                               | <p><b>Case-control study</b>—Give the eligibility criteria, and the sources and methods of case ascertainment and control selection. Give the rationale for the choice of cases and controls. For matched studies, give matching criteria and the number of controls per case</p> <p><b>Cross-sectional study</b>—Give the eligibility criteria, and the sources and methods of selection of participants</p> |                                                                                               |
| Variables                                     | <ul style="list-style-type: none"> <li>• All outcomes</li> <li>• Exposures- definition of exposure of interest,</li> <li>• Predictors</li> <li>• Potential confounders</li> <li>• Effect modifiers</li> </ul>                                                                                                                                                                                                 | Outcomes of interest (Clinical parameters; Healthcare resource use and cost; Quality of life) |
| Data Sources/Measurement                      | <ul style="list-style-type: none"> <li>• For each variable of interest, give sources of data and details of methods of assessment (measurement).</li> <li>• Describe comparability of assessment methods if there is more than one group</li> <li>• Data collection points table</li> <li>• Blinding procedure</li> </ul>                                                                                     | Supplementary material                                                                        |
| Bias                                          | <p>Describe any efforts to address potential sources of bias. More specifically:</p> <ul style="list-style-type: none"> <li>• Information bias</li> <li>• Selection Bias</li> <li>• Control for confounding</li> </ul>                                                                                                                                                                                        | NA                                                                                            |
| Statistical analysis plan                     | <ul style="list-style-type: none"> <li>• Method of primary / secondary outcomes and additional analysis</li> <li>• Handling of missing data</li> <li>• Post-hoc analysis</li> </ul>                                                                                                                                                                                                                           | Data analysis (Statistical analysis; Cost-effectiveness analysis; Budget impact analysis)     |
| Handling of withdrawals and lost to follow up | Describe the procedures to be followed when a participant ceases participation in the study prematurely or is lost to follow up                                                                                                                                                                                                                                                                               | NA                                                                                            |
| Replacements                                  | Provide information on whether or not participants who discontinue the study will be replaced via additional recruitment to maintain the required sample size.                                                                                                                                                                                                                                                | NA                                                                                            |
| Outcome                                       | Define and describe all primary and secondary outcome or lost to follow up                                                                                                                                                                                                                                                                                                                                    | Outcomes of interest (Clinical parameters; Healthcare resource use and cost; Quality of life) |
| Database management                           | <p>Detail plan of database management including:</p> <ul style="list-style-type: none"> <li>• Data collection (electronic or paper based),</li> <li>• Source data</li> <li>• Data entry</li> <li>• Data editing</li> <li>• Coding</li> <li>• Data storage</li> </ul>                                                                                                                                          | Data collection and management                                                                |

|                                                  |                                                                                                                                                              |                                                          |
|--------------------------------------------------|--------------------------------------------------------------------------------------------------------------------------------------------------------------|----------------------------------------------------------|
|                                                  | <ul style="list-style-type: none"> <li>• Record retention</li> <li>• Data confidentiality</li> </ul>                                                         |                                                          |
| Validation of instrument                         | Reliability / validity of instrument or plan to establish validation                                                                                         | NA                                                       |
| Follow up                                        | Plan of follow up and addressing lost to follow up                                                                                                           | Study design                                             |
| Quality control                                  | <ul style="list-style-type: none"> <li>• Method of quality control</li> <li>• Monitoring (internal and external)</li> <li>• Training of surveyors</li> </ul> | NA                                                       |
| Quality assurance                                | Plan of quality assurance                                                                                                                                    | NA                                                       |
| Expected outcome / results                       | A brief description of expected outcome or results                                                                                                           | NA                                                       |
| <b>iv) Ethical consideration</b>                 |                                                                                                                                                              |                                                          |
| Ethical approval                                 | Whether it has been obtained and name of ethical committees. If approval not sought, Reason                                                                  | Ethics and dissemination                                 |
| Agreement and consent                            | Method of taking consent. Reason if consent not sought                                                                                                       | Patient and public involvement; Ethics and dissemination |
| Risk / Harm to participants                      | Any potential risk or harm to study participants                                                                                                             | NA                                                       |
| Adverse event and Severe adverse event reporting | Outline how Adverse Event and Severe adverse event information will be collected.                                                                            | NA                                                       |
| <b>v) Reporting and dissemination</b>            |                                                                                                                                                              |                                                          |
| Protocol amendments                              | Methods of communicating to investigators/IRBs and documenting                                                                                               | Study design                                             |
| Dissemination                                    | How results will be disseminated to participants, practitioners, public                                                                                      | Ethics and dissemination                                 |
| Publication Plan                                 | Who has right to publish; restrictions; authorship guidelines<br>Open Access                                                                                 | Ethics and dissemination                                 |
| Reporting of early stopping                      | Dissemination of results if trial is stopped early (for any reason)                                                                                          | NA                                                       |
| <b>vi) Others</b>                                |                                                                                                                                                              |                                                          |
| Limitations                                      | Limitations of proposed study, including risk of bias                                                                                                        | Strengths and limitations of this study                  |
| Strength of study                                | Highlight strengths of proposed study                                                                                                                        | Strengths and limitations of this study                  |
| References                                       | List of references cited in protocol                                                                                                                         | References                                               |
| Data collection forms                            | Summary table of all forms used for data collection at each point of study                                                                                   | Supplementary materials                                  |
| Inform consent forms                             | Sample of informed consent form, translated into local language                                                                                              | NA                                                       |
| Funding                                          | Source of funding and the role of the funders for the present study                                                                                          | Funding                                                  |
| Acknowledgement for protocol development         | Acknowledgement of persons involved in protocol preparation                                                                                                  | Acknowledgements                                         |
| Data sharing policy                              | To describe how data will be made available in public domain.                                                                                                |                                                          |
| Contributions of authors to protocol             | Listed authors should have participated sufficiently in preparation of protocol with details of their contribution.                                          | Authors contribution                                     |
| Trial registry                                   | For observational studies also registered as trial                                                                                                           | NA                                                       |
| Annexures                                        | Data collection form /instruments                                                                                                                            | Supplementary materials                                  |

1  
2  
3  
4  
5  
6  
7  
8  
9  
10  
11  
12  
13  
14  
15  
16  
17  
18  
19  
20  
21  
22  
23  
24  
25  
26  
27  
28  
29  
30  
31  
32  
33  
34  
35  
36  
37  
38  
39  
40  
41  
42  
43  
44  
45  
46  
47  
48  
49  
50  
51  
52  
53  
54  
55  
56  
57  
58  
59  
60

|  |                                                                                                              |  |
|--|--------------------------------------------------------------------------------------------------------------|--|
|  | Informed consent form<br>Standard operating procedures (SOPs)<br>Detailed Statistical analysis plan<br>(SAP) |  |
|--|--------------------------------------------------------------------------------------------------------------|--|

For peer review only



# BMJ Open

## Impella vs. VA-ECMO for the treatment of Patients with Cardiogenic Shock. The Impella Network project: Observational Study Protocol for Cost-effectiveness and Budget Impact Analyses

|                               |                                                                                                                                                                                                                                                                                                                                                                                                                                                                                                                                                                                                                                                                                                                                                                                                                                                                                                                                                                                                                                                                                                                                                                                                                                                                                                                                                                                                                                                                                                                                                                                                                                                                                                                                                                                                                                                                                                                                                                                                                                                                                                                                                                                                                                                                                                                                                                                                                                                                            |
|-------------------------------|----------------------------------------------------------------------------------------------------------------------------------------------------------------------------------------------------------------------------------------------------------------------------------------------------------------------------------------------------------------------------------------------------------------------------------------------------------------------------------------------------------------------------------------------------------------------------------------------------------------------------------------------------------------------------------------------------------------------------------------------------------------------------------------------------------------------------------------------------------------------------------------------------------------------------------------------------------------------------------------------------------------------------------------------------------------------------------------------------------------------------------------------------------------------------------------------------------------------------------------------------------------------------------------------------------------------------------------------------------------------------------------------------------------------------------------------------------------------------------------------------------------------------------------------------------------------------------------------------------------------------------------------------------------------------------------------------------------------------------------------------------------------------------------------------------------------------------------------------------------------------------------------------------------------------------------------------------------------------------------------------------------------------------------------------------------------------------------------------------------------------------------------------------------------------------------------------------------------------------------------------------------------------------------------------------------------------------------------------------------------------------------------------------------------------------------------------------------------------|
| Journal:                      | <i>BMJ Open</i>                                                                                                                                                                                                                                                                                                                                                                                                                                                                                                                                                                                                                                                                                                                                                                                                                                                                                                                                                                                                                                                                                                                                                                                                                                                                                                                                                                                                                                                                                                                                                                                                                                                                                                                                                                                                                                                                                                                                                                                                                                                                                                                                                                                                                                                                                                                                                                                                                                                            |
| Manuscript ID                 | bmjopen-2023-078358.R2                                                                                                                                                                                                                                                                                                                                                                                                                                                                                                                                                                                                                                                                                                                                                                                                                                                                                                                                                                                                                                                                                                                                                                                                                                                                                                                                                                                                                                                                                                                                                                                                                                                                                                                                                                                                                                                                                                                                                                                                                                                                                                                                                                                                                                                                                                                                                                                                                                                     |
| Article Type:                 | Protocol                                                                                                                                                                                                                                                                                                                                                                                                                                                                                                                                                                                                                                                                                                                                                                                                                                                                                                                                                                                                                                                                                                                                                                                                                                                                                                                                                                                                                                                                                                                                                                                                                                                                                                                                                                                                                                                                                                                                                                                                                                                                                                                                                                                                                                                                                                                                                                                                                                                                   |
| Date Submitted by the Author: | 06-Jun-2024                                                                                                                                                                                                                                                                                                                                                                                                                                                                                                                                                                                                                                                                                                                                                                                                                                                                                                                                                                                                                                                                                                                                                                                                                                                                                                                                                                                                                                                                                                                                                                                                                                                                                                                                                                                                                                                                                                                                                                                                                                                                                                                                                                                                                                                                                                                                                                                                                                                                |
| Complete List of Authors:     | <p>ARDITO, VITTORIA; SDA Bocconi School of Management<br/>         ROGNONI, CARLA; SDA Bocconi School of Management<br/>         Pieri, Marina; Istituto di Ricovero e Cura a Carattere Scientifico Ospedale San Raffaele, Department of Anesthesia and Intensive Care; Vita-Salute San Raffaele University<br/>         Barbone, Alessandro; IRCCS Humanitas Research Hospital<br/>         Briguori, Carlo; Clinica Mediterranea SpA, Mediterranea Cardiocentro<br/>         Cigala, Emanuele; Ospedale Monaldi, UOC Cardiologia Interventistica<br/>         Gerosa, Gino; Università degli Studi di Padova, Department of Cardiac, Thoracic, Vascular Sciences and Public Health<br/>         Iannaccone, Mario; ASL Città di Torino, Division of Cardiology, San Giovanni Bosco Hospital<br/>         Loforte, Antonio; Azienda Ospedaliero Universitaria Città della Salute e della Scienza di Torino, Dipartimento di Scienze Chirurgiche<br/>         Marini, Marco; Azienda Ospedaliero Universitaria delle Marche, Dipartimento di Scienze Cardiovascolari<br/>         Montalto, Andrea; Azienda Ospedaliera di Caserta Sant'Anna e San Sebastiano<br/>         Oreglia, Jacopo; Niguarda Hospital<br/>         Pacini, Davide ; University of Bologna,<br/>         Pennacchi, Mauro; Azienda Ospedaliera San Camillo Forlanini, Dipartimento Cardio Toraco Vascolare, U.O. Cardiologia Interventistica<br/>         Pestrighella, Vincenzo; Ospedale Mater Dei, Division of Cardiology<br/>         Porto, Italo; Ospedale Policlinico San Martino Istituto di Ricovero e Cura a Carattere Scientifico per l'Oncologia, DICATOV-CardioThoracic and Vascular; Università degli Studi di Genova Scuola di Scienze Mediche e Farmaceutiche, University of Genova, Policlinico San Martino IRCCS<br/>         Stefano, Pierluigi; Azienda Ospedaliero Universitaria Careggi<br/>         Tarantini, Giuseppe; Università degli Studi di Padova, Department of Cardiac, Thoracic, Vascular Sciences and Public Health<br/>         Valente, Serafina; Azienda Ospedaliera Universitaria Senese<br/>         Vandoni, Pietro; Fondazione IRCCS San Gerardo dei Tintori<br/>         Tarricone, Rosanna; Bocconi University, Department of Social and Political Science; SDA Bocconi School of Management<br/>         Scandroglio, Anna; Istituto di Ricovero e Cura a Carattere Scientifico Ospedale San Raffaele, Department of Anesthesia and Intensive Care</p> |

1  
2  
3  
4  
5  
6  
7  
8  
9  
10  
11  
12  
13  
14  
15  
16  
17  
18  
19  
20  
21  
22  
23  
24  
25  
26  
27  
28  
29  
30  
31  
32  
33  
34  
35  
36  
37  
38  
39  
40  
41  
42  
43  
44  
45  
46  
47  
48  
49  
50  
51  
52  
53  
54  
55  
56  
57  
58  
59  
60

|                                    |                                                   |
|------------------------------------|---------------------------------------------------|
| <b>Primary Subject Heading</b> :   | Health economics                                  |
| <b>Secondary Subject Heading</b> : | Cardiovascular medicine, Health economics         |
| <b>Keywords</b> :                  | CARDIOLOGY, HEALTH ECONOMICS, Observational Study |
|                                    |                                                   |

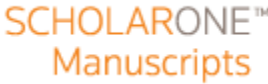

# Impella vs. VA-ECMO for the treatment of Patients with Cardiogenic Shock. The Impella Network project: Observational Study Protocol for Cost-effectiveness and Budget Impact Analyses

## Authors:

Vittoria Ardito<sup>1</sup>, Carla Rognoni<sup>1,\*</sup>, Marina Pieri<sup>2,3</sup>, Alessandro Barbone<sup>4</sup>, Carlo Briguori<sup>5</sup>, Emanuele Cigala<sup>6</sup>, Gino Gerosa<sup>7</sup>, Mario Iannaccone<sup>8</sup>, Antonio Loforte<sup>9</sup>, Marco Marini<sup>10</sup>, Andrea Montalto<sup>11</sup>, Jacopo Oreglia<sup>12</sup>, Davide Pacini<sup>13</sup>, Mauro Pennacchi<sup>14</sup>, Vincenzo Pestrichella<sup>15</sup>, Italo Porto<sup>16,17</sup>, Pierluigi Stefano<sup>18</sup>, Giuseppe Tarantini<sup>7</sup>, Serafina Valente<sup>19</sup>, Pietro Vandoni<sup>20</sup>, Rosanna Tarricone<sup>1,21</sup> and Anna Mara Scandroglio<sup>2</sup>

## Affiliations:

<sup>1</sup> Centre for Research on Health and Social Care Management (CERGAS), SDA Bocconi School of Management, Milan, Italy

<sup>2</sup> Department of Anesthesia and Intensive Care, IRCCS San Raffaele Scientific Institute, Milan, Italy

<sup>3</sup> Vita Salute San Raffaele University, Milan, Italy

<sup>4</sup> IRCCS Humanitas Research Hospital, Milan, Italy

<sup>5</sup> Mediterranea Cardiocentro, Napoli, Italy

<sup>6</sup> UOC Cardiologia Interventistica, Ospedale Monaldi, Azienda dei Colli, Napoli, Italy

<sup>7</sup> Department of Cardiac, Thoracic, Vascular Sciences and Public Health, University of Padua Medical School, Padua, Italy

<sup>8</sup> Division of Cardiology, San Giovanni Bosco Hospital, ASL Città di Torino, Turin, Italy

<sup>9</sup> AOU Città della Salute e della Scienza, Dipartimento di Scienze Chirurgiche, Università di Torino, Torino, Italy

<sup>10</sup> Azienda Ospedaliero-Universitaria delle Marche, Dipartimento di Scienze Cardiovascolari, Ancona, Italy

<sup>11</sup> Ospedale di Caserta, Caserta, Italy

<sup>12</sup> Niguarda Hospital, Milano, Italy

<sup>13</sup> Ospedale S. Orsola, Bologna, Italy

<sup>14</sup> Dipartimento Cardio Toraco Vascolare, U.O. Cardiologia Interventistica, Azienda Ospedaliera San Camillo - Forlanini, Roma, Italy

<sup>15</sup> Division of Cardiology, Mater Dei Hospital, Bari, Italy

<sup>16</sup> Cardiothoracic and Vascular Department (DICATOV), IRCCS Ospedale Policlinico San Martino, Genoa, Italy;

<sup>17</sup> Department of Internal Medicine and Medical Specialties (DIMI), University of Genoa, Genoa, Italy

<sup>18</sup> Ospedale Careggi, Firenze, Italy<sup>19</sup> Azienda Ospedaliera-Universitaria Siena, Italy

<sup>20</sup> Fondazione IRCCS San Gerardo dei Tintori, Monza, Italy

<sup>21</sup> Department of Social and Political Science, Bocconi University, Milan, Italy

## Correspondence:

Centre for Research on Health and Social Care Management (CERGAS), SDA Bocconi School of Management, Bocconi University, Via Sarfatti 10, Milan 20136, Italy

Phone: +39 02 5836 2729

Email: carla.rognoni@unibocconi.it

1  
2  
3  
4  
5  
6  
7  
8  
9  
10  
11  
12  
13  
14  
15  
16  
17  
18  
19  
20  
21  
22  
23  
24  
25  
26  
27  
28  
29  
30  
31  
32  
33  
34  
35  
36  
37  
38  
39  
40  
41  
42  
43  
44  
45  
46  
47  
48  
49  
50  
51  
52  
53  
54  
55  
56  
57  
58  
59  
60

*Note:* first and last author names go to the two PIs (Bocconi and San Raffaele), whereas the names of the other clinical centers are ordered alphabetically by surname.

For peer review only

## Abstract

**Introduction.** The treatment of patients with cardiogenic shock (CS), encompasses several health technologies including Impella pumps and veno-arterial extra-corporeal membrane oxygenation (VA-ECMO). However, while they are widely used in clinical practice, information on resource use and quality of life (QoL) associated to these devices is scarce. The aim of this study is therefore to collect and comparatively assess clinical and socio-economic data of Impella versus VA-ECMO for the treatment of patients with severe CS, to ultimately conduct both a cost-effectiveness (CEA) and budget impact (BIA) analyses.

**Methods and analysis.** This is a prospective plus retrospective, multicenter study conducted under the scientific coordination of the Center for Research on Health and Social Care Management (CERGAS) of SDA Bocconi School of Management and clinical coordination of IRCCS San Raffaele Scientific Institute in Milan. The Impella Network stemmed for the purposes of this study and comprises seventeen Italian clinical centers from Northern to Southern Regions in Italy. The Italian network qualifies as a subgroup of the international Impella Cardiac Surgery (ImCarS) Registry. Patients with CS treated with Impella pumps (CP, 5.0 or 5.5) will be prospectively recruited, and information on clinical outcomes, resource use and QoL collected. Economic data will be retrospectively matched with data from comparable patients treated with VA-ECMO. Both CEA and BIA will be conducted adopting the societal perspective in Italy. This study will contribute to generate new socio-economic evidence to inform future coverage decisions.

**Ethics and dissemination.** As of May 2024, most of the clinical centers submitted the documentation to their Ethical Committee (N=13; 76%), six centers received ethical approval, and two centers started to enroll patients. Study results will be published in peer-reviewed publications and disseminated through conference presentations.

## Strengths and limitations of this study

- This is an observational multicenter study that will evaluate the cost-effectiveness and budget impact associated to use of Impella against VA-ECMO in the treatment of patients with cardiogenic shock;

- 1  
2  
3  
4  
5  
6  
7  
8  
9  
10  
11  
12  
13  
14  
15  
16  
17  
18  
19  
20  
21  
22  
23  
24  
25  
26  
27  
28  
29  
30  
31  
32  
33  
34  
35  
36  
37  
38  
39  
40  
41  
42  
43  
44  
45  
46  
47  
48  
49  
50  
51  
52  
53  
54  
55  
56  
57  
58  
59  
60
- The analyses will be performed with the two-fold perspective of the national health system and the larger society in Italy;
  - Data collection will leverage the existing infrastructure of the Impella Cardiac Surgery (ImCarS) Registry;
  - The outcomes of interests that will be collected are both clinical parameters and socio-economic data, including healthcare resource use and costs, and quality of life;
  - This study does not consider alternative therapeutic courses for the treatment of patients with cardiogenic shock (e.g., intra-aortic balloon pump, pharmacological therapy alone), nor the combination of devices (e.g., ECPPELLA), as primary therapeutic strategy.

# Introduction

## Background

Mechanical circulatory support (MCS) has gained wide application for the treatment of cardiogenic shock (CS) and received a class IIA recommendation by the most recent European Society of Cardiology guidelines on heart failure [1]. In recent years, transcatheter systems have brought great innovation in this field since they enable mechanical left ventricle (LV) unloading, through a lower invasive approach compared to previous generation extracorporeal support devices, equally providing high anterograde flow to reverse the shock status and end-organ damage. They have also the potential to overcome some typical limitations of MCS providing full support up to prolonged period of time and promote patients' recovery at the same time [2–6].

Although both devices are widely used in daily practice, evidence on their uptake and clinical efficacy is constantly evolving. Several meta-analyses evaluated MCS devices for the management of patients with CS [7–9], yet only a few were comparative studies on Impella versus VA-ECMO [10–13]. In this context, conducting comparative studies like randomized controlled trials (RCTs) has proven to be complex, with 5 out of seven RCTs on Impella being discontinued due to inadequate patients' enrollment [14]. Comparative effectiveness studies have become increasingly pivotal since the new Health Technology Assessment Regulation (HTAR 2021/2282) was approved in December 2021 by the EU Parliament [15]. With this regulation, high-risk, life-saving technologies would need to be comparatively assessed at the European level, in line also with the national guidelines of several countries in Europe. However, a prior review by Ardito et al. highlighted that to date virtually no study investigates comparatively socio-economic variables in association to the use of Impella versus VA-ECMO [10]. In light of the new regulatory provisions, the lack of comparative robust clinical and socio-economic evidence might be paralyzing for Member State who are called to take informed coverage and reimbursement decisions [16–18]. As a matter of fact, the limited healthcare resources need to be allocated considering not only the health impact on patient outcomes, but also the financial burden for government budgets. In this context, performing not only economic evaluations (e.g., cost-effectiveness analysis or cost-utility analysis) but also health technology assessments at large, accounting for social, organizational, legal, ethical, or environmental aspects of health technologies, will thus become increasingly pivotal for the uptake of new health technologies and their coverage under national health

1  
2  
3 services. To date, there are only a few studies investigating the cost effectiveness of MCS devices in the  
4 literature. For instance, in a study from 2013 by Roos et al., the cost-effectiveness of Impella was compared to  
5 the intra-aortic balloon pump (IABP) in the European perspective, by considering only direct costs [19]. In  
6 2015, the clinical and economic impact of percutaneous ventricular assist devices (pVAD) were compared  
7 with IABP for high-risk patients undergoing percutaneous coronary intervention (PCI) by means of conducting  
8 a retrospective analysis of published evidence [20]. More recently, another study examined the benefits, harms,  
9 cost-effectiveness, and budget impact of the Impella percutaneous ventricular assist device (pVAD) in high-  
10 risk PCI and CS [21]. This work builds on the need to conduct more comparative studies in the field of MCS  
11 health technologies for the treatment of cardiogenic shock, and to expand the knowledge from existing studies  
12 in the Italian framework, which report clinical but not economic data [22–25].  
13  
14  
15  
16  
17  
18  
19  
20  
21  
22  
23  
24  
25

### 26 **Study objectives**

27  
28 The aim of this study is to generate comparative evidence on the use of Impella versus VA-ECMO for the  
29 treatment of patients with severe CS, with the goal to ultimately perform a cost-effectiveness (CEA) and budget  
30 impact (BIA) analyses from the national health system (NHS) and societal perspectives in Italy. Both  
31 prospective and retrospective data on clinical endpoints and healthcare resource consumption will be collected  
32 in Italian heart failure referral centers reunited in what has been named the Impella Network.  
33  
34  
35  
36  
37  
38  
39  
40

### 41 **The Impella Network**

42  
43 The Impella Network has been created with the purpose of conducting this study. It is a national scientific and  
44 medical entity which connects all the Italian institutions within MCS programs and referral for heart failure  
45 treatment in which Impella is already used in the clinical practice. All the centers involved in the Impella  
46 Network currently run MCS programs and treat patients with CS.  
47  
48  
49  
50

51  
52 The creation of the Impella Network is promoted under the joint scientific coordination of the Center for  
53 Research on Health and Social Care Management (CERGAS) of SDA Bocconi School of Management and  
54 IRCCS San Raffaele Scientific Institute in Milan. To answer its specific research question (i.e., assessing the  
55 cost-effectiveness and budget impact of Impella versus VA-ECMO for patients with CS), the Impella Network  
56  
57  
58  
59  
60



will leverage the infrastructure of the existing Impella Cardiac Surgery (ImCarS) Registry, therefore qualifying as an ImCarS subgroup analysis of the Italian scenario.

Italian centers were eligible to join the Impella Network if all the following requirements were fulfilled: i) level 2 or 3 center status (with onsite heart failure and mechanical circulatory support program); ii) implantation of Impella 5.0 or Impella CP as standard of care per site; iii) at least one Impella 5.0 or 20 Impella CP implants in the last 3 years (from 2020 to present). The centers meeting the inclusion criteria have been asked to join the Impella Network through a formal invitation from CERGAS SDA Bocconi and IRCCS San Raffaele Scientific Institute as principal clinical center. Table 1 presents the list of clinical centers who agreed to be part of this study.

*Table 1 List of clinical centers involved in the data collection*

| <b>ID</b> | <b>Clinical Center</b>                                                         | <b>Location</b> |
|-----------|--------------------------------------------------------------------------------|-----------------|
| 1         | IRCCS Ospedale San Raffaele (PI)                                               | Milano          |
| 2         | ASST Grande Ospedale Metropolitano Niguarda                                    | Milano          |
| 3         | San Giovanni Bosco Hospital                                                    | Torino          |
| 4         | Azienda Ospedaliera Universitaria di Padova                                    | Padova          |
| 5         | Policlinico di Sant'Orsola                                                     | Bologna         |
| 6         | Ospedale Careggi                                                               | Firenze         |
| 7         | Azienda Ospedaliera Universitaria Città della Salute e della Scienza di Torino | Torino          |
| 8         | Mater Dei Hospital                                                             | Bari            |
| 9         | Azienda Ospedaliera Sant'Anna e San Sebastiano                                 | Caserta         |
| 10        | Fondazione IRCCS San Gerardo dei Tintori                                       | Monza           |
| 11        | Mediterranea Cardiocentro                                                      | Napoli          |
| 12        | IRCCS Ospedale Policlinico San Martino                                         | Genova          |
| 13        | Azienda Ospedaliera S.Camillo Forlanini                                        | Roma            |
| 14        | Azienda Ospedaliero-Universitaria delle Marche                                 | Ancona          |
| 15        | IRCCS Humanitas Research Hospital                                              | Rozzano         |
| 16        | Azienda Ospedaliera-Universitaria Siena                                        | Siena           |
| 17        | Ospedale Monaldi, Azienda dei Colli                                            | Napoli          |

Interestingly, as the field of MCS evolves at high speed and scientific evidence is pivotal to improve clinical practice, the Impella Network might also become a facilitator for prospective analyses of future technologies, and be considered eligible for inclusion in international projects on MCS.

## Methods and Analysis

### Study design

This will be an observational multicenter study. Patients with severe CS treated either with Impella (CP, 5.0 or 5.5) or with VA-ECMO will represent the study population in the prospective arm. This study population will be compared with a similar population of retrospective patients treated with VA-ECMO for severe CS, which will represent the control group. There is no randomization procedure and all patients will be treated according to the standard of care per site. This protocol has been written following the SPIROS (Standardized Protocol Items: Recommendations for Observational Studies) guidelines [26].

The prospective study foresees a period of six months of follow-up for each patient. Investigators are requested to enroll all patients with CS in their units, according to the inclusion criteria. Data will be collected on a strictly observational basis. The investigators will carry out their usual activity, without any constraints due to the study, both in terms of diagnosis but also regarding patients' management, and the choice of possible treatments. Medical and mechanical circulatory support treatment will be initiated at the discretion of each investigator, according to routine practice. Overall study duration might be variable depending on the time needed for patient enrollment and follow-up in each site, but is estimated to be approximately around 18 months.

Information of comparable patients will be retrieved by retrospectively reviewing the clinical records of patients treated for CS in the Impella Network (retrospective study arm). This information will be retrieved by the clinicians in each participating center and will be inputted within the Impella Cardiac Surgery (ImCarS) Registry, and will ultimately populate the study database together with the information from the prospective study arm. All patients who meet inclusion and exclusion criteria in the appropriate time periods (see "Study population" paragraph) will be included, both for the patients treated with Impella (study arm) and for the patients treated with VA-ECMO (control arm).

It is anticipated that the study protocol might be subject to minor amendments depending on how the data collection unfolds (e.g. fewer patients treated with the technologies in scope to be enrolled in the study, or fewer centers participating in the study).

## Study population

### *Patients treated with Impella*

The study population will include all patients suffering from CS, according to clinically relevant classifications (Interagency Registry for mechanically assisted circulatory support (INTERMACS) and International Society for Cardiovascular Angiography and Interventions (SCAI)) treated with Impella 5.5, Impella 5.0 or Impella CP at the Impella Network institutions. To be included in the study group (i.e. Impella Intention To Treat group), patients must meet all the following inclusion criteria:

- CS at presentation (as defined by INTERMACS Class 1-2-3 or SCAI Class C-D-E);
- Support as single device strategy;
- Impella support duration of at least 24 hours;
- Patients treated in the last 3 years (2020-2022) (for retrospective data collection);
- Onset of CS from less than 12 hours.

Different primary diseases and etiologies of heart failure are expected: patients will be further stratified according to the cause of heart failure and phenotype of presentation to account for potential bias in the analysis. Patients' shock degree will also be objectified through clinical risk score calculation. Furthermore, patients meeting any of the following exclusion criteria will not be included in the study:

- Impella implantation for elective protected PCI;
- Impella implantation for post-cardiotomy CS;
- Impella support duration for less than 24 hours;

### *Patients treated with VA-ECMO*

The control group will include all patients treated at the Impella Network institutions for severe left ventricular failure with VA-ECMO. To be included in the control group (i.e. VA-ECMO intention to treat group), patients must fulfill ALL the following inclusion criteria:

- CS at presentation (as defined by INTERMACS Class 1-2-3 or SCAI Class C-D-E);
- VA-ECMO support as single device strategy;
- VA-ECMO support duration of at least 24 hours;

- Onset of CS from less than 12 hours.

Different primary diseases and etiologies of heart failure are expected: patients will be further stratified according to the cause of heart failure and phenotype of presentation to account for potential bias in the analysis. Patients' shock degree will also be objectified through clinical risk score calculation. Furthermore, patients meeting any of the following exclusion criteria will not be included in the study:

- VA-ECMO support for post-cardiotomy CS;
- VA-ECMO support duration for less than 24 hours;
- VA-ECMO for refractory prolonged cardiac arrest (ECPR);
- Presence of biventricular failure;
- Onset of CS from more than 12 hours.

In the era of Impella 5.0/5.5, patients with CS treated with VA-ECMO may be indicative of a more severe population compared to the study group counterpart. In order to prevent potential bias, only VA-ECMO patients with isolated LV failure will be included in the study and patients with CS severity profile comparable to the Impella counterpart at baseline will be analyzed.

### **Sample size**

For the prospective arms, any patient treated with Impella or VA-ECMO technologies that meets the inclusion criteria will be recruited and considered for the analyses. Therefore, the sample size cannot be estimated *ex-ante*. For the retrospective arm, based on previous data from the Italian clinical experience, it is expected that data from approximately 200 VA-ECMO patients will be retrieved and included in the analyses.

### **Outcomes of interest**

#### ***Clinical parameters***

Data related to medical history, shock related hospitalization, mechanical circulatory support characteristics (for Impella or VA-ECMO), clinical and hospital outcomes will be collected from each center and included in a pre-specified structured data set. Short term MCS related adverse events will be defined according to most recent recommendations [27]. In addition to data registered at specific time points (for example, at baseline)

1  
2  
3 and outcome measures, several hemodynamic, laboratory and clinical data will be assessed regularly during  
4 the treatment with Impella or VA ECMO to assess the evolution of the condition of shock during support. The  
5 detailed list of clinical parameters to be collected through the study is outlined in the Supplementary Material  
6  
7  
8  
9 1.

### 11 ***Healthcare resource use and costs***

13 Direct healthcare resource use will be identified through the analysis of collected clinical data (e.g., number of  
14 visits, device implanted, possible management of adverse events, etc.). Monetary quantification will be  
15 performed by applying official reimbursement rates (e.g., DRGs for hospitalizations or tariffs for outpatient  
16 services).

17  
18  
19  
20  
21  
22 The collection of “societal costs” will be performed through the administration to patients of a socio-economic  
23 questionnaire, developed ad hoc by CERGAS researchers, and it will include information on out-of-pocket  
24 (OOP) expenses (e.g. transport costs for carrying out visits or exams), productivity losses and cost of informal  
25 care (provided by relatives). The questionnaire will be administered by the clinicians involved in the study to  
26 patients before the intervention (at baseline) and during the follow-up visits (e.g., at 30 days).

27  
28  
29  
30  
31  
32 Direct healthcare resource use will be measured both for prospective and retrospective patients, while  
33 information on “societal costs” will only be available for the group of prospective patients as it is collected  
34 through patient questionnaires (not available retrospectively). The detailed list of healthcare resource use  
35 variables and the questionnaire to assess the societal impact are reported in the Supplementary Material 2 and  
36  
37  
38  
39  
40  
41  
42  
43  
44  
45  
46  
47  
48  
49  
50  
51  
52  
53  
54  
55  
56  
57  
58  
59  
60  
Supplementary Material 3, respectively.

### 43 ***Quality of life***

45 Only for the patients prospectively enrolled in the study, the patient's quality of life will be measured through  
46 the EuroQol 5D-5L questionnaires. EuroQol 5D-5L is a questionnaire capable of providing a generic and  
47 synthetic measure of the quality of life (QoL) in relation to health. The questionnaire consists of two parts: the  
48 first includes five items that refer to different health aspects: mobility, personal care, usual activities, pain or  
49 discomfort, anxiety or depression. For each item there are five levels of response which indicate, for that area,  
50 the absence or presence of mild, moderate, severe or extreme problems. The second part of the questionnaire  
51 consists of a graduated visual analogue scale (VAS) from 0 to 100 on which the subject indicates his/her

1  
2  
3 perceived state of health. The questionnaire will be administered by the clinicians involved in the study to  
4 patients before the intervention (at baseline) if possible and during the follow-up visits (e.g., at 7 days, 30 days)  
5 using a paper-based format. The clinicians will choose an appropriate timing to fill in the questionnaire, namely  
6 when patients are awake, conscious and willing to respond. However, should the patients be too weak to  
7 respond, or should they fail to recover from the shock, they will be excluded from the QoL analyses.  
8  
9

10  
11  
12  
13 The questionnaire has been requested for non-commercial use via the [EuroQol website](#) (registration ID 48771),  
14 and is reported in its integral version in the Supplementary Material 4.  
15  
16  
17

### 18 19 20 **Data collection and management**

21  
22 Data will be collected through the infrastructure of the existing ImCarS Registry. While this study qualifies as  
23 an independent study answering a specific research question (i.e., assessing the cost-effectiveness and budget  
24 impact of Impella vs. VA-ECMO for patients with CS), it will leverage the ImCarS Registry (i.e., eCRF, IT  
25 platform, capabilities) as a facilitator for the data collection phase [28], therefore qualifying as an ImCarS  
26 subgroup analysis of the Italian scenario. More in details, each center belonging to Impella Network will join  
27 the ImCarS registry and the current project will benefit from the employment of an electronic Case Report  
28 Form (eCRF), that will support any activities related to data collection. The company that will handle the eCRF  
29 and will ensure data protection is KKS Gießen Marburg. A per-patient fee of approximately 300€ for Impella  
30 cases and 100€ for VA-ECMO cases will be provided by the ImCarS Registry to each participating center.  
31 Possibly a clinical research organization (CRO) could be involved upon request of the clinical centers for the  
32 management of periodic quality controls to ensure completeness and consistency according to a specific plan  
33 agreed among the participating centers. Each clinical center will maintain the ownership of the data points of  
34 their own patients.  
35  
36  
37  
38  
39  
40  
41  
42  
43  
44  
45  
46  
47  
48

49 Patient data recorded in each participating clinical center (hospital medical records) as well as responses to  
50 quality of life and socio-economic questionnaires will be anonymized and entered by the clinicians in the eCRF  
51 of ImCarS Registry. At the end of the applicable operations and checks, the anonymized data set will be  
52 transferred to CERGAS researchers in order to perform the cost-effectiveness analysis (CEA) and budget  
53 impact analysis (BIA).  
54  
55  
56  
57  
58  
59  
60

## Data analysis

### *Statistical analysis*

The data obtained will be analyzed in a descriptive and inferential way using the most suitable statistical model for each variable. Continuous variables with a symmetrical distribution (e.g., age, questionnaire scores) will be expressed as means and standard deviations (SD). As regards the asymmetrically distributed continuous variables (such as, for example, hospital stay) they will be expressed as median and range. The categorical variables (gender, intra and postoperative complications) will be expressed as frequencies and percentages. Sub-group analyses may be performed depending on the type of data collected, to have consistent results. Possible missing data for the retrospective group of patients will be treated case by case, depending on the quality of the data themselves.

### *Cost-Effectiveness Analysis (CEA)*

The implementation of a CEA model [29] will aim to compare the management of patients with CS with Impella versus VA-ECMO from both NHS and societal perspectives in Italy. The analysis will follow the Consolidated Health Economic Evaluation Reporting Standards (CHEERS) [30, 31].

The model will project costs, life years (LYs) and quality adjusted life years (QALYs) on a lifetime horizon in order to evaluate the incremental cost-effectiveness ratio (ICER) and the incremental cost-utility ratio (ICUR). They will be calculated as the difference in the mean expected costs divided by the difference in the mean expected health outcomes (LYs or QALYs) of the considered management strategies. It has to be specified that QoL will be measured as long as patients stay alive. Interpolation techniques might be used to manage missing data (e.g., to carry forward QoL measurements occurred prior to death); however, patients who never completed QoL measurements will be excluded from QALYs analyses.

The CEA model will be developed based on the following phases: 1) Identification of clinical pathways and healthcare resources consumption for the considered strategies; 2) Inclusion of patients' clinical outcomes and possibly quality of life for the considered strategies (available from data collection phase); 3) Monetary quantification of the healthcare resource consumption from both NHS and societal perspectives (e.g., DRG charges/tariffs, productivity losses and out-of-pocket costs reported by the patients); 4) Analysis and

1  
2  
3 interpretation of model results; 5) Sensitivity analyses. In addition, if collected data will allow it, centers will  
4  
5 be clustered based on the number of implanted Impella devices and patients treated, to investigate if there is a  
6  
7 relationship between cost-effectiveness and the volumes of device use in each center. The definition of the  
8  
9 clusters and conduct of sub-group analyses will depend on the data that will be actually collected.  
10

### 11 ***Budget Impact Analysis (BIA)***

12  
13 A BIA model will be developed starting from the CEA model to evaluate the impact on the hospital healthcare  
14  
15 expenditure in Italy of the adoption of Impella, possibly differentiating by the type of Impella pumps, over a  
16  
17 period of 3 or 5 years, according to the following steps: 1) Identification of patients' pathways and healthcare  
18  
19 resources consumption for the considered strategies; 2) Monetary quantification of the healthcare resource  
20  
21 consumption from the hospital perspective through a micro-costing analysis; 3) Definition of the current  
22  
23 scenario of distribution of patients among the two considered options: Impella 5.0 and VA-ECMO; 4)  
24  
25 Definition of future scenarios in which appropriate increased uses of Impella according to different annual  
26  
27 penetration rates are considered. The forecasted increased use of Impella may be estimated on the basis of the  
28  
29 evidence available in the literature and/or by clinical opinions collected by an ad-hoc e-survey and by  
30  
31 observing market trends in other jurisdictions (e.g., Germany, USA); 5) Analysis and interpretation of model  
32  
33 results; 6) Sensitivity analyses (e.g., Impella 5.5).  
34  
35

36  
37 As a final note, it has to be highlighted that the BIA will be conducted from an Italian perspective, based on  
38  
39 the cost framework observed within Italian facilities. Therefore, extending the study results to other  
40  
41 geographical contexts should be done with caution, and marginal adjustments might be needed to account for  
42  
43 country-specific differences in the costs sustained at the local level.  
44  
45

### 46 **Patient and public involvement**

47  
48 Being an observational study, patients will be enrolled as part of the research activities. Informed consent will  
49  
50 be provided to, and signed by, patients to ensure the purposes of the study are well understood, and the patients'  
51  
52 interests protected. We plan on involving relevant patient associations when disseminating the study results.  
53  
54  
55  
56  
57  
58  
59  
60



## Ethics and dissemination

The study will be conducted in accordance with legal and regulatory requirements, as well as with scientific purpose, value and rigor and follow generally accepted research practices described in Good Clinical Practices.

No specific risks related to the enrolment in the study are expected for patients, since the study is observational and patients will receive best available treatment. Informed consent collection will be performed according to the ImCarS registry protocol and eventually further disciplined according to specific guidelines and/or best practices of the Ethical Committees of each clinical center. Similarly, collection of data at each participating site will be performed according to the policies of the local institutional review board/ethics committee.

All parties will comply with all applicable laws, including laws regarding the implementation of organizational and technical measures to ensure protection of patient personal data. Such measures will include omitting patient names or other directly identifiable data in any reports, publications, or other disclosures.

SDA Bocconi received approval of this protocol from Bocconi University's Ethical Committee (EC). IRCCS San Raffaele Hospital Institute also received ethical approval of the ImCarS protocol from its EC. In parallel, each clinical center had to present the documentation to join the ImCarS Registry to their own ECs for approval. As of May 2024, among the participating centers, the majority (N=13, 76%) already presented the relevant documentation, while six of them – Azienda Ospedaliera San Camillo Forlanini (Rome), Clinica Mediterranea (Naples), San Giovanni Bosco (Turin), Città della Salute e della Scienza (Turin), and Humanitas (Rozzano) – already received the EC approval.

The study results will be disseminated through peer-reviewed scientific publications and presentation in international conferences. The economic analyses, namely the results of the CEA and BIA analyses, will be published in one or more scientific publications on top-tier, peer-reviewed journals. The exact publication pipeline depends from the actual start of the data collection. After the end of the data collection, it will take approximately 9 months for the research team to process the evidence and prepare the aforementioned manuscripts.

## List of abbreviations

BIA: Budget impact analysis

CEA: Cost-effectiveness analysis

CERGAS: Center for Research on Health and Social Care Management

CHEERS: Consolidated Health Economic Evaluation Reporting Standards

CRO: Clinical research organization

CS: Cardiogenic shock

DRG: Diagnosis related groups

EC: Ethical Committee

eCFR: electronic Case Report Form

HTAR: Health Technology Assessment Regulation

IABP: Intra-aortic balloon pump

ICER: Incremental cost-effectiveness ratio

ImCarS: Impella Cardiac Surgery

IRCCS: Istituto di Ricovero e Cura a Carattere Scientifico (research hospital)

LV: Left ventricle

LYs: Life years

MCS: Mechanical circulatory support

NHS: National Health System

OOP: Out-of-pocket

PCI: Percutaneous coronary intervention

pVAD: Percutaneous ventricular assist devices

QALYs: Quality adjusted life years

QoL: Quality of life

RCTs: Randomized controlled trials

SD: Standard deviation

SPIROS: Standardized Protocol Items: Recommendations for Observational Studies

1  
2  
3 VA-ECMO: Veno-arterial extra-corporeal membrane oxygenation  
4

5 VAS: Visual analogue scale  
6

## 7 **Footnotes**

### 10 **Authors contributions**

11  
12 RT and AMS developed the initial study concept. VA, CR and MP devised the study design, including  
13 methodology, and wrote the original draft of the protocol. AB, CB, EC, GG, MI, AL, MM, AM, JO, DP, MP,  
14 VP, IP, PS, GT, SV, PV contributed to critical revisions of the manuscript. RT and AMS are the Scientific  
15 Coordinators of the study and take overall responsibility for all aspects of study design, the protocol and the  
16 study conduct. RT acquired funding for the study. All authors VA, CR, MP, AB, CB, EC, GG, MI, AL, MM,  
17 AM, JO, DP, MP, VP, IP, PS, GT, SV, PV, RT and AMS contributed to review and editing of the protocol and  
18 have read and approved this manuscript.  
19  
20  
21  
22  
23  
24  
25  
26

### 27 **Funding**

28  
29 This work was supported by Abiomed Europe GmbH through an unrestricted grant (grant number: N/A).  
30  
31  
32

### 33 **Acknowledgements**

34  
35 The authors thank Prof. Dr. Bernd Niemann from the University of Giessen and his team for their contribution  
36 to defining the variables to be included in the study protocol in line with the ImCarS Registry.  
37  
38

### 39 **Conflict of interest**

40  
41 None to declare.  
42  
43  
44  
45  
46  
47  
48  
49  
50  
51  
52  
53  
54  
55  
56  
57  
58  
59  
60

1  
2  
3  
4  
5  
6  
7  
8  
9  
10  
11  
12  
13  
14  
15  
16  
17  
18  
19  
20  
21  
22  
23  
24  
25  
26  
27  
28  
29  
30  
31  
32  
33  
34  
35  
36  
37  
38  
39  
40  
41  
42  
43  
44  
45  
46  
47  
48  
49  
50  
51  
52  
53  
54  
55  
56  
57  
58  
59  
60

## References

- [1] T. A. McDonagh *et al.*, “2021 ESC Guidelines for the diagnosis and treatment of acute and chronic heart failure,” *European Heart Journal*, vol. 42, no. 36, pp. 3599–3726, Sep. 2021, doi: 10.1093/eurheartj/ehab368.
- [2] M. Pahuja, J. Hernandez-Montfort, E. H. Whitehead, M. Kawabori, and N. K. Kapur, “Device profile of the Impella 5.0 and 5.5 system for mechanical circulatory support for patients with cardiogenic shock: overview of its safety and efficacy,” *Expert Review of Medical Devices*, vol. 19, no. 1, pp. 1–10, Jan. 2022, doi: 10.1080/17434440.2022.2015323.
- [3] W. G. Cohen *et al.*, “Extended Support With the Impella 5.5: Transplant, ECMO, and Complications,” *ASAIO Journal*, vol. Publish Ahead of Print, Apr. 2023, doi: 10.1097/MAT.0000000000001931.
- [4] J. Schultz *et al.*, “Axillary or Subclavian Impella 5.0 Support in Cardiogenic Shock: A Systematic Review and Meta-analysis,” *ASAIO J*, vol. 68, no. 2, pp. 233–238, Feb. 2022, doi: 10.1097/MAT.0000000000001452.
- [5] A. M. Bernhardt *et al.*, “First in man evaluation of a novel circulatory support device: Early experience with the Impella 5.5 after CE mark approval in Germany,” *The Journal of Heart and Lung Transplantation*, vol. 40, no. 8, pp. 850–855, Aug. 2021, doi: 10.1016/j.healun.2021.04.001.
- [6] G. Nersesian *et al.*, “Propensity score-based analysis of 30-day survival in cardiogenic shock patients supported with different microaxial left ventricular assist devices,” *Journal of Cardiac Surgery*, vol. 36, no. 11, pp. 4141–4152, Nov. 2021, doi: 10.1111/jocs.15932.
- [7] K. G. Vargas *et al.*, “Impella in cardiogenic shock following acute myocardial infarction: a systematic review and meta-analysis,” *Wien Klin Wochenschr*, vol. 132, no. 23–24, pp. 716–725, Dec. 2020, doi: 10.1007/s00508-020-01712-y.
- [8] M. Iannaccone *et al.*, “Short term outcomes of Impella in cardiogenic shock: A review and meta-analysis of observational studies,” *International Journal of Cardiology*, vol. 324, pp. 44–51, Feb. 2021, doi: 10.1016/j.ijcard.2020.09.044.
- [9] G. Batsides, J. Massaro, A. Cheung, E. Soltesz, D. Ramzy, and M. B. Anderson, “Outcomes of Impella 5.0 in Cardiogenic Shock: A Systematic Review and Meta-analysis,” *Innovations (Phila)*, vol. 13, no. 4, pp. 254–260, Jul. 2018, doi: 10.1097/IMI.0000000000000535.
- [10] V. Ardito, L. Sarucanian, C. Rognoni, M. Pieri, A. M. Scandroglio, and R. Tarricone, “Impella Versus VA-ECMO for Patients with Cardiogenic Shock: Comprehensive Systematic Literature Review and Meta-Analyses,” *JCDD*, vol. 10, no. 4, p. 158, Apr. 2023, doi: 10.3390/jcdd10040158.
- [11] S. Ahmad *et al.*, “Impella Versus Extracorporeal Membranous Oxygenation (ECMO) for Cardiogenic Shock: A Systematic Review and Meta-analysis,” *Current Problems in Cardiology*, vol. 48, no. 1, p. 101427, Jan. 2023, doi: 10.1016/j.cpcardiol.2022.101427.
- [12] Z. R. Affas, G. G. Touza, and S. Affas, “A Meta-Analysis Comparing Venoarterial (VA) Extracorporeal Membrane Oxygenation (ECMO) to Impella for Acute Right Ventricle Failure,” *Cureus*, Nov. 2021, doi: 10.7759/cureus.19622.
- [13] W. Abusnina *et al.*, “IMPELLA VERSUS EXTRACORPOREAL MEMBRANE OXYGENATION IN CARDIOGENIC SHOCK: A SYSTEMATIC REVIEW AND META-ANALYSIS,” *Shock*, vol. 58, no. 5, pp. 349–357, Nov. 2022, doi: 10.1097/SHK.0000000000001996.
- [14] “Is There Randomized Controlled Trial Data Available for Impella® Heart Pump Use in Cardiogenic Shock?” Abiomed, 2020. [Online]. Available: <https://www.heartrecovery.com/education/education-library/faq-rct-data-impella-cardiogenic-shock>
- [15] “Regulation on Health Technology Assessment.” European Commission. [Online]. Available: [https://health.ec.europa.eu/health-technology-assessment/regulation-health-technology-assessment\\_en#:~:text=The%20new%20framework%20covers%20joint,applies%20as%20of%20January%202025](https://health.ec.europa.eu/health-technology-assessment/regulation-health-technology-assessment_en#:~:text=The%20new%20framework%20covers%20joint,applies%20as%20of%20January%202025)
- [16] M. Drummond, R. Tarricone, and A. Torbica, “European union regulation of health technology assessment: what is required for it to succeed?,” *Eur J Health Econ*, pp. s10198-022-01458–6, Mar. 2022, doi: 10.1007/s10198-022-01458-6.

- 1  
2  
3 [17] R. Tarricone *et al.*, “Establishing a national HTA program for medical devices in Italy: Overhauling a  
4 fragmented system to ensure value and equal access to new medical technologies,” *Health Policy*, vol.  
5 125, no. 5, pp. 602–608, May 2021, doi: 10.1016/j.healthpol.2021.03.003.
- 6 [18] “Harmonization Of Health Technology Assessment Across The European Union: Lessons For The  
7 United States.” Dec. 02, 2021. doi: 10.1377/forefront.20211130.24462.
- 8 [19] J. B. Roos *et al.*, “The cost-effectiveness of a new percutaneous ventricular assist device for high-risk  
9 PCI patients: mid-stage evaluation from the European perspective,” *Journal of Medical Economics*,  
10 vol. 16, no. 3, pp. 381–390, Mar. 2013, doi: 10.3111/13696998.2012.762004.
- 11 [20] A. P. Shah *et al.*, “Clinical and economic effectiveness of percutaneous ventricular assist devices for  
12 high-risk patients undergoing percutaneous coronary intervention,” *J Invasive Cardiol*, vol. 27, no. 3,  
13 pp. 148–154, Mar. 2015.
- 14 [21] Health Quality Ontario, “Percutaneous Ventricular Assist Devices: A Health Technology Assessment,”  
15 *Ont Health Technol Assess Ser*, vol. 17, no. 2, pp. 1–97, 2017.
- 16 [22] A. Chieffo *et al.*, “Observational multicentre registry of patients treated with IMPella mechanical  
17 circulatory support device in Italy: the IMP-IT registry,” *EuroIntervention*, vol. 15, no. 15, pp. e1343–  
18 e1350, Feb. 2020, doi: 10.4244/EIJ-D-19-00428.
- 19 [23] M. B. Ancona *et al.*, “Device-related complications after Impella mechanical circulatory support  
20 implantation: an IMP-IT observational multicentre registry substudy,” *European Heart Journal. Acute  
21 Cardiovascular Care*, vol. 10, no. 9, pp. 999–1006, Dec. 2021, doi: 10.1093/ehjacc/zuab051.
- 22 [24] V. Tarzia *et al.*, “Prognosticating Mortality of Primary Cardiogenic Shock Requiring Extracorporeal  
23 Life Support: The RESCUE Score,” *Current Problems in Cardiology*, vol. 48, no. 4, p. 101554, Apr.  
24 2023, doi: 10.1016/j.cpcardiol.2022.101554.
- 25 [25] V. Tarzia *et al.*, “Extracorporeal life support in cardiogenic shock: Impact of acute versus chronic  
26 etiology on outcome,” *The Journal of Thoracic and Cardiovascular Surgery*, vol. 150, no. 2, pp. 333–  
27 340, Aug. 2015, doi: 10.1016/j.jtcvs.2015.02.043.
- 28 [26] R. Mahajan *et al.*, “Standardized Protocol Items Recommendations for Observational Studies  
29 (SPIROS) for Observational Study Protocol Reporting Guidelines: Protocol for a Delphi Study,” *JMIR  
30 Res Protoc*, vol. 9, no. 10, p. e17864, Oct. 2020, doi: 10.2196/17864.
- 31 [27] R. L. Kormos *et al.*, “Updated definitions of adverse events for trials and registries of mechanical  
32 circulatory support: A consensus statement of the mechanical circulatory support academic research  
33 consortium,” *The Journal of Heart and Lung Transplantation*, vol. 39, no. 8, pp. 735–750, Aug. 2020,  
34 doi: 10.1016/j.healun.2020.03.010.
- 35 [28] B. Niemann *et al.*, “Rationale and Initiative of the Impella in Cardiac Surgery (ImCarS) Register  
36 Platform,” *Thorac Cardiovasc Surg*, vol. 70, no. 06, pp. 458–466, Sep. 2022, doi: 10.1055/s-0042-  
37 1749686.
- 38 [29] M. Drummond, *Methods for the Economic Evaluation of Health Care Programmes*, OUP Oxford.  
39 2015.
- 40 [30] D. Husereau *et al.*, “Consolidated Health Economic Evaluation Reporting Standards (CHEERS)—  
41 Explanation and Elaboration: A Report of the ISPOR Health Economic Evaluation Publication  
42 Guidelines Good Reporting Practices Task Force,” *Value in Health*, vol. 16, no. 2, pp. 231–250, Mar.  
43 2013, doi: 10.1016/j.jval.2013.02.002.
- 44 [31] D. Husereau *et al.*, “Consolidated Health Economic Evaluation Reporting Standards (CHEERS) 2022  
45 Explanation and Elaboration: A Report of the ISPOR CHEERS II Good Practices Task Force,” *Value  
46 in Health*, vol. 25, no. 1, pp. 10–31, Jan. 2022, doi: 10.1016/j.jval.2021.10.008.
- 47  
48  
49  
50  
51  
52  
53  
54  
55  
56  
57  
58  
59  
60

## Supplementary Materials

### Supplementary Materials 1. Clinical parameters

Table 1 reports the comprehensive list of clinical variables to be collected for both prospective and retrospective patients. Specifically, the relevant variables for the Impella and ECMO groups are specified, along with the timing for measurements during the observation period.

| Patients' characteristics                     | Target patients |            | Timing of measurement |  |  |  |
|-----------------------------------------------|-----------------|------------|-----------------------|--|--|--|
|                                               | Impella group   | ECMO group | T0 (Baseline)         |  |  |  |
| Age (years)                                   | X               | X          | X                     |  |  |  |
| Sex (male/female)                             | X               | X          | X                     |  |  |  |
| BMI (kg/m <sup>2</sup> )                      | X               | X          | X                     |  |  |  |
| Arterial Hypertension (yes/no)                | X               | X          | X                     |  |  |  |
| Diabetes Mellitus (yes/no)                    | X               | X          | X                     |  |  |  |
| Chronic kidney disease (yes/no)               | X               | X          | X                     |  |  |  |
| Peripheral artery disease(yes/no)             | X               | X          | X                     |  |  |  |
| ICD/CRT (yes/no)                              | X               | X          | X                     |  |  |  |
| Previous PTCA (yes/no)                        | X               | X          | X                     |  |  |  |
| Previous CABG (yes/no)                        | X               | X          | X                     |  |  |  |
| Chronic heart failure (yes/no)                | X               | X          | X                     |  |  |  |
| <i>Cause of acute heart failure:</i>          |                 |            |                       |  |  |  |
| *Acute coronary syndrome (yes/no)             | X               | X          | X                     |  |  |  |
| *Myocarditis (yes/no)                         | X               | X          | X                     |  |  |  |
| *End stage dilatative cardiomyopathy (yes/no) | X               | X          | X                     |  |  |  |
| *Arrhythmia/ arrhythmic storm(yes/no)         | X               | X          | X                     |  |  |  |
| *Other (specify)                              | X               | X          | X                     |  |  |  |
| <i>Phenotype of cardiogenic shock:</i>        |                 |            |                       |  |  |  |
| * LV dominant (yes/no)                        | X               | X          | X                     |  |  |  |
| *RV isolated (yes/no)                         | X               | X          | X                     |  |  |  |
| * Biventricular failure(yes/no)               | X               | X          | X                     |  |  |  |
| Onset of shock (hours)                        | X               | X          | X                     |  |  |  |
| <i>Hemodynamic presentation of shock:</i>     |                 |            |                       |  |  |  |
| * Wet and cold (classic CS) (yes/no)          | X               | X          | X                     |  |  |  |

|                                                                 |                  |               |               |  |  |  |
|-----------------------------------------------------------------|------------------|---------------|---------------|--|--|--|
| * Wet and warm (vasodilatory CS)<br>(yes/no)                    | X                | X             | X             |  |  |  |
| * Dry and cold (euvolemic CS)<br>(yes/no)                       | X                | X             | X             |  |  |  |
| Revascularization procedure with<br>stent implantation (yes/no) | X                | X             | X             |  |  |  |
| Cardiac arrest(yes/no)                                          | X                | X             | X             |  |  |  |
| eGFR (ml/min/m2)                                                | X                | X             | X             |  |  |  |
| AKI requiring CRRT yes/no)                                      | X                | X             | X             |  |  |  |
| Mechanical ventilation yes/no)                                  | X                | X             | X             |  |  |  |
| Days of mechanical ventilation<br>yes/no)                       | X                | X             | X             |  |  |  |
| <b>Mortality risk score</b>                                     | Impella<br>group | ECMO<br>group | T0 (Baseline) |  |  |  |
| NYHA                                                            | X                | X             | X             |  |  |  |
| INTERMACS score                                                 | X                | X             | X             |  |  |  |
| SCAI class                                                      | X                | X             | X             |  |  |  |
| CARDshock score (see below)                                     | X                | X             | X             |  |  |  |
| RESCUE SCORE                                                    | X                | X             | X             |  |  |  |
| SAVE score                                                      | X                | X             | X             |  |  |  |
| <b>MCS strategy and data</b>                                    | Impella<br>group | ECMO<br>group | Event (Y/N)   |  |  |  |
| <i>Implantation pathway:</i>                                    |                  |               |               |  |  |  |
| * MCS escalation (yes/no)                                       | X                | X             | X             |  |  |  |
| * MCS de-escalation (yes/no)                                    | X                | X             | X             |  |  |  |
| * First support (yes/no)                                        | X                | X             | X             |  |  |  |
| <i>Device implantation pre PCI</i><br>(yes/no)                  | X                | X             | X             |  |  |  |
| <i>Device implantation post PCI</i><br>(yes/no)                 | X                | X             | X             |  |  |  |
| <i>Implantation strategy<sup>1</sup>:</i>                       |                  |               |               |  |  |  |
| * Bridge to recovery (yes/no)                                   | X                | X             | X             |  |  |  |
| * Bridge to LVAD (yes/no)                                       | X                | X             | X             |  |  |  |
| * Bridge to transplant (yes/no)                                 | X                | X             | X             |  |  |  |
| * Bridge to candidacy (yes/no)                                  | X                | X             | X             |  |  |  |
| <i>Implantation route:</i>                                      |                  |               |               |  |  |  |
| *Axillar (yes/no)                                               | X                | X             | X             |  |  |  |
| * Femoral (yes/no)                                              | X                | X             | X             |  |  |  |
| Successful implantation (yes/no)                                | X                | X             | X             |  |  |  |

<sup>1</sup> Typically reassessed also at the end of the patient journey, as it might be subject to changes from the original plan

|                                                               |               |            |                              |                                     |                           |                                        |
|---------------------------------------------------------------|---------------|------------|------------------------------|-------------------------------------|---------------------------|----------------------------------------|
| Need for surgical implant (yes/no)                            | X             | X          | X                            |                                     |                           |                                        |
| Duration of implantation (min)                                | X             | X          | Y, minutes                   |                                     |                           |                                        |
| <b>Hemodynamic and Lab Parameters Trend</b>                   | Impella group | ECMO group | T0 (Baseline)                | 24 h post implantation              | 48-72 h post implantation | First measurement after device removal |
| Mean arterial pressure (mmHg)                                 | X             | X          | X                            | X                                   | X                         | X                                      |
| Systolic arterial pressure (mmHg)                             | X             | X          | X                            | X                                   | X                         | X                                      |
| Heart rate (bpm)                                              | X             | X          | X                            | X                                   | X                         | X                                      |
| CVP (mmHg)                                                    | X             | X          | X                            | X                                   | X                         | X                                      |
| CI (l/min/mq)                                                 | X             | X          | X                            | X                                   | X                         | X                                      |
| PCWP (mmHg)                                                   | X             | X          | X                            | X                                   | X                         | X                                      |
| SvO2 (%)                                                      | X             | X          | X                            | X                                   | X                         | X                                      |
| RVSWI (g/m/beat/m <sup>2</sup> )                              | X             | X          | X                            | X                                   | X                         | X                                      |
| Creatinine (mg/dl)                                            | X             | X          | X                            | X                                   | X                         | X                                      |
| Lactates (mmol/L)                                             | X             | X          | X                            | X                                   | X                         | X                                      |
| Troponin (pg/ml)                                              | X             | X          | X                            | X                                   | X                         | X                                      |
| Inotropic score                                               | X             | X          | X                            | X                                   | X                         | X                                      |
| NT-proBNP (ng/L)                                              | X             | X          | X                            | X                                   | X                         | X                                      |
| Platelets (per microliter)                                    | X             | X          | X                            | X                                   | X                         | X                                      |
| D-dimers (µg/mL)                                              | X             | X          | X                            | X                                   | X                         | X                                      |
| Bilirubin (mg/dl)                                             | X             | X          | X                            | X                                   | X                         | X                                      |
| LV EF (%)                                                     | X             | X          | X                            | X                                   | X                         | X                                      |
| RV EF (%)                                                     | X             | X          | X                            | X                                   | X                         | X                                      |
| Mechanical ventilation (yes/no)                               | X             | X          | X                            | X                                   | X                         | X                                      |
| <b>Safety in-hosp complications</b>                           | Impella group | ECMO group | Event during support(yes/no) | Eventual comments/event description |                           |                                        |
| <i>Bleeding (and site):</i>                                   |               |            |                              |                                     |                           |                                        |
| *Major (yes/no)                                               | X             | X          |                              |                                     |                           |                                        |
| *Moderate (yes/no)                                            | X             | X          |                              |                                     |                           |                                        |
| *Minor (yes/no)                                               | X             | X          |                              |                                     |                           |                                        |
| Bleeding requiring surgery (yes/no)                           | X             | X          |                              |                                     |                           |                                        |
| Bleeding from Impella (ECMO insertion site (yes/no)           | X             | X          |                              |                                     |                           |                                        |
| Limb ischemia (yes/no)                                        | X             | X          |                              |                                     |                           |                                        |
| Vascular complication requiring intervention/surgery (yes/no) | X             | X          |                              |                                     |                           |                                        |
| Ischemic stroke (yes/no)                                      | X             | X          |                              |                                     |                           |                                        |
| Device malfunction(yes/no)                                    | X             | X          |                              |                                     |                           |                                        |
| LV perforation (yes/no)                                       | X             |            |                              |                                     |                           |                                        |



|                                                          |               |            |                |                                     |
|----------------------------------------------------------|---------------|------------|----------------|-------------------------------------|
| Aortic valve injury (yes/no)                             | X             |            |                |                                     |
| Mitral valve injury (yes/no)                             | X             |            |                |                                     |
| Lesion to other intracardiac structure (yes/no)          | X             | X          |                |                                     |
| aortic dissection (yes/no)                               | X             | X          |                |                                     |
| Other device related injury (yes/no)                     | X             | X          |                |                                     |
| Major Hemolysis (yes/no)                                 | X             | X          |                |                                     |
| Minor Hemolysis (yes/no)                                 | X             | X          |                |                                     |
| AKI requiring CRRT (yes/no)                              | X             | X          |                |                                     |
| Sepsis (yes/no)                                          | X             | X          |                |                                     |
| Extracorporeal purification (i.e. Cytosorb) (yes/no)     |               |            |                |                                     |
| EC transfusion, numbers of unit                          | X             | X          |                |                                     |
| FFP transfusion, numbers of unit                         | X             | X          |                |                                     |
| PLT transfusion, numbers of unit                         | X             | X          |                |                                     |
| <b>Device related outcomes</b>                           | Impella group | ECMO group | Variable       | Eventual comments/event description |
| Duration of MCS support (days)                           | X             | X          |                |                                     |
| mobilization (chair) with MCS and physiotherapy (yes/no) | X             | X          |                |                                     |
| mobilization (walk) with MCS and physiotherapy (yes/no)  | X             | X          |                |                                     |
| Major device malfunction (yes/no)                        | X             | X          |                |                                     |
| Device exchange (yes/no)                                 | X             | X          |                |                                     |
| Reason for device exchange                               | X             | X          |                |                                     |
| <b>Survival and cardiac outcomes</b>                     | Impella group | ECMO group | Event (yes/no) | Eventual comments/event description |
| 30-day mortality (yes/no)                                | X             | X          |                |                                     |
| ICU mortality (yes/no)                                   | X             | X          |                |                                     |
| Hospital mortality (yes/no)                              | X             | X          |                |                                     |
| Survival to next therapy (yes/no)                        | X             | X          |                |                                     |
| Weaning from MCS (yes/no)                                | X             | X          |                |                                     |
| Myocardial recovery (yes/no)                             | X             | X          |                |                                     |
| Bridge to LVAD (yes/no)                                  | X             | X          |                |                                     |
| Bridge to Transplant (yes/no)                            | X             | X          |                |                                     |
| Cause of death                                           | X             | X          |                |                                     |
| Duration of ICU stay, days                               | X             | X          |                |                                     |
| Duration of hospital stay, days                          | X             | X          |                |                                     |
| Sequelae of hospital complication at discharge (yes/no)  | X             | X          |                |                                     |

1  
2  
3  
4  
5  
6  
7  
8  
9  
10  
11  
12  
13  
14  
15  
16  
17  
18  
19  
20  
21  
22  
23  
24  
25  
26  
27  
28  
29  
30  
31  
32  
33  
34  
35  
36  
37  
38  
39  
40  
41  
42  
43  
44  
45  
46  
47  
48  
49  
50  
51  
52  
53  
54  
55  
56  
57  
58  
59  
60

|                                                 |   |   |  |  |
|-------------------------------------------------|---|---|--|--|
| Details of sequelae                             | X | X |  |  |
| Duration of mechanical ventilation(days)        | X | X |  |  |
| Tracheostomy (yes/no)                           | X | X |  |  |
| Able to perform self-care at discharge (yes/no) | X | X |  |  |
| Able to return to work at discharge (yes/no)    | X | X |  |  |

**CARDshock score calculation:**

Age &gt; 75 years (yes/no)

Confusion at presentation (yes/no)

Prior myocardial infarction of CABG (yes/no)

Acute coronary syndrome ethology (yes/no)

Blood lactate level (&lt;2/2-4/&gt;4)

eGRF (>60/30-60/<30 ml/min/m<sup>2</sup>)

To the eCRF section dedicated to DTI, it should be added bivalirudin.

It should be added a section that recaps the types of antibiotics use and the duration of therapy (to estimate costs):

| Antibiotic class                               | Use (yes/no) | Duration of therapy (days) |
|------------------------------------------------|--------------|----------------------------|
| Cephalosporines (yes/no)                       |              |                            |
| Pennicillins (yes/no)                          |              |                            |
| Penicillins (yes/no)                           |              |                            |
| Glycopeptides (yes/no)                         |              |                            |
| Fluoroquinolones (yes/no)                      |              |                            |
| Macrolides (yes/no)                            |              |                            |
| Carbapenems (yes/no)                           |              |                            |
| Lyncosamids (yes/no)                           |              |                            |
| Aminoglicosides (yes/no)                       |              |                            |
| Tetracyclins (yes/no)                          |              |                            |
| Sulfonamides (yes/no)                          |              |                            |
| Oxazolidinones (yes/no)                        |              |                            |
| Polypeptides (yes/no)                          |              |                            |
| Other (yes/no) – specify class                 |              |                            |
| Second line antibiotic therapy needed (yes/no) |              |                            |

## Supplementary Material 2. Healthcare resource use variables (hospital data)

The health services performed to follow-up the patients will be measured by recording the number of assessments performed over the study observation period. These data represent the items necessary to determine the direct healthcare costs incurred by the healthcare system which will be included in the Cost Effectiveness Analysis (CEA). These data are normally traced by hospital records (e.g., eHRs, administrative data), and should be only transferred into the Register platform from treating clinicians. These data are not to be asked to patients. These variables will be measured throughout the patient's the hospital stay. In this study, the following data will be recorded by the doctors during the 6-month follow-up period.

### Section 1. Hospitalizations

#### 1.1 Reason for hospitalization

- Heart failure: yes/no/unknown + number
- Ictus ischemic: yes/no/unknown + number
- Ictus hemorrhagic: yes/no/unknown + number
- Bleeding: yes/no/unknown + number
- Renal failure: yes/no/unknown + number
- Respiratory failure: yes/no/unknown + number
- Arrhythmia: yes/no/unknown + number
- Other (please specify): \_\_\_\_\_ [maximum 5 reasons]

1.2 Number of bed-days in regular ward (e.g., cardiac care ward, other): n (units)

1.3 Number of days in ICU (i.e., intensive care unit): n (units)

#### 1.4 Procedures performed (0 if no procedures are performed)

- Blood transfusion: yes/no/unknown + number
- Dialysis: yes/no/unknown + number
- Ventilatory support: yes/no/unknown + number
- Surgery: yes/no/unknown + number
- Type of surgery (qualitative comment)
- Local interventions: Gastroscopy: yes/no/unknown + number
- Local interventions: Thoracic drainage: yes/no/unknown + number
- Local interventions: Endoscopy: yes/no/unknown + number
- Local interventions: other (please specify name and units): \_\_\_\_\_
- Physiotherapy: yes/no; nr. of weekly cycles: n (units)
- Ambulatory visit: n (units)

#### 1.5 Exams

- CT Scan: yes/no; n (units)
- MRI: yes/no; n (units)
- Angiography: yes/no; n (units)
- Other (please specify): \_\_\_\_\_

### Section 2: Pharmaceutical consumption during hospitalization

1  
2  
3 2.1 Drugs used  
4

- 5 • Antibiotics: yes/no; days on antibiotics (units)  
6

7 2.2 Medical devices used

- 8 • Nr. of Impella devices used (units)  
9 • Nr. of ECMO devices used (units)  
10 • Dialysis: yes/no  
11 • Extracorporeal purification: yes/no  
12     ○ (If yes) Cytosorb: yes/no  
13     ○ (If yes) Other (please specify): yes/no + name  
14 • Other (please specify) \_\_\_\_\_  
15  
16

17 **Section 3: Emergency department**

- 18  
19 • ER access for heart failure-related symptoms: yes/no  
20 • ER access with no subsequent hospitalization: yes/no + number  
21 • ER access leading to hospitalization: yes/no + number  
22 • Use of the ambulance services: yes/no  
23  
24

25 **Section 4: Other relevant information**

- 26 • Recovery time needed to go back to work or to “normal life” (from clinician’s perspective): 30 days/60  
27 days/120 days/NA  
28  
29  
30  
31  
32  
33  
34  
35  
36  
37  
38  
39  
40  
41  
42  
43  
44  
45  
46  
47  
48  
49  
50  
51  
52  
53  
54  
55  
56  
57  
58  
59  
60

### Supplementary Material 3. Patient questionnaire to assess the societal impact of the disease

The following questionnaire will be answered by patients. It has been translated in Italian and will be administered to patients in Italian, however it will be inserted in the Register in English. Both Italian and English versions are provided hereafter. The questionnaire is comprised of two parts:

- A. baseline questionnaire, to be administered at signature of informed consent/at ICU-discharge (typically in-person);
- B. follow-up questionnaire, to be administered at 6 months, typically over the phone.

\*\*\*\*\*

#### A. Baseline questionnaire

##### 1. Employment status:

###### 1.1 What is your current employment status?

If employee:

- factory worker
- employee
- manager, director

If self-employed:

- businessman/woman, freelancer
- other self-employed

If non-professional status:

- retired
- student
- housewife
- other, not employed

###### 1.2 If you are a worker, what is your employment status?

- Full time
- Part-time: 20 hours/week
- Part-time: 24 hours/week
- Part-time: 30 hours/week
- Part-time: 36 hours/week

##### 2. Travel information:

###### 2.1 How much do you spend on average to reach the hospital?

€ \_\_\_\_\_

###### 2.2 How do you typically reach the hospital?

- By car
- By public transport
- By taxi

- 1  
2  
3 • Other (specify)  
4  
5

6 \*\*\*  
7

8 B. Follow-up questionnaire  
9

10 1. Out-of-pocket (OOP) expenses information:

11 1.1 In the past 3 months, did you sustain any expense due to cardiogenic shock?

12 Yes

13 No

14 1.2 If yes, what were the healthcare expenses related to?

15 Medical care

- 16 • Specialty visits/exams (e.g., second opinion)  
17 • Drugs (e.g., non-reimbursable drugs, supplements)  
18 • Psychological support  
19 • Other (specify)  
20  
21  
22

23  
24 1.3 If yes, how much did you spend for each health event?

25 € \_\_\_\_\_

26 € \_\_\_\_\_

27 € \_\_\_\_\_  
28  
29

30 2. Hospitalizations outside the clinical site of study:

31 2.1 In the past 3 months, were you hospitalized in a different hospital from this one?

- 32 • Yes  
33 • No  
34  
35

36 2.2 If yes, please indicate the reason: \_\_\_\_\_ and the hospitalization duration (days):  
37 \_\_\_\_\_  
38

39 2.3 Did you use emergency services?

- 40 • Emergency department  
41 • Ambulance  
42 • None  
43  
44  
45

46 2.4 Did you pay for any of these services?

- 47 • Yes  
48 • No  
49  
50

51 2.5 If yes, how much did you spend?

52 € \_\_\_\_\_  
53  
54

55 3. Informal or formal assistance:

56 3.1 Who gave you informal assistance following your episode of cardiogenic shock? If more than one person,  
57 please indicate the one who gives you the most help.

- 58 • No one  
59 • Spouse/cohabitant/partner  
60

- Child
- Parent
- Brother/Sister
- Friend
- Other

3.2 If you indicated that someone assists you, how many days does this person assist you, on average, each month, due to issues related to cardiogenic shock? If you want to indicate half a day, write 0,5.

\_\_\_\_\_ days

3.3 If you indicated that someone assists you, considering the total time you receive as informal assistance from this person, please indicate what percentage you are assisted in the following activities (the sum of the percentages must make 100%):

| Activities                                                                                              | % |
|---------------------------------------------------------------------------------------------------------|---|
| Nursing activities (eg. drugs administration) and personal care (eg. getting dressed, personal washing) |   |
| Daily activities (eg. work, study, house works, family activities, entertainment, travel)               |   |
| Psychological support                                                                                   |   |

3.4 In the past 3 months, because of complications following your case of cardiogenic shock, have you turned to paid contractors/workers for household help (e.g., babysitter, domestic helper)? (1 answer only)

1. No
2. Yes; How much did you spend? \_\_\_\_\_ €

4. Limitations caused by the pathology:

4.1 In the past 3 months, approximately how many days of work (professional or home) have you lost due to problems related to cardiogenic shock (if half a day, indicate 0.5)? Exclude any days you have missed for visits, examinations or hospitalizations.

\_\_\_\_\_ days

4.2 In the past 3 months, how many days have you missed out on activities related to your personal and social life (e.g., going out with friends, hobbies, sports, family activities, etc.) due to problems related to cardiogenic shock (if half a day, indicate 0.5)? Exclude any days you have missed for visits, examinations or hospitalizations.

\_\_\_\_\_ days

#### **Supplementary Material 4. Patient questionnaire to assess quality of life (EQ-5D-5L)**

The EQ-5D-5L questionnaire will be administered to patients included prospectively in the study. The Italian validated version of the questionnaire will be employed. The questionnaire will be administered in a paper-based format, with the clinicians supporting the administration phase (e.g., reading out loud the questions to the patients and making their answers). The questionnaire will be administered to patients in Italian, and inputted in English in the Register. The questionnaire will be administered in three time points following Impella or ECMO implantation: i) after 7 days (i.e., while the patient is still in the hospital); ii) after 30 days; iii) after 6 months of follow-up. A formal request to use the EQ-5D-5L questionnaire has been submitted via the official website (ID: 48771).

### **Questionario sulla salute**

#### **Versione italiana per l'Italia**

*(Italian version for Italy)*

#### **VERSIONE PER LA SOMMINISTRAZIONE DA PARTE DELL'INTERVISTATORE/INTERVISTATRICE**

---

*Nota per l'intervistatore/intervistatrice: sebbene si debba tenere conto del particolare stile di conversazione dell'intervistatore/intervistatrice, il testo delle istruzioni del questionario dovrà essere seguito il più fedelmente possibile. Nel caso del sistema descrittivo EQ-5D-5L a pagina 2 del questionario, il testo deve essere seguito fedelmente.*

*Se l'intervistato/a ha difficoltà nello scegliere una risposta, o chiede chiarimenti, l'intervistatore/intervistatrice dovrà ripetere la domanda parola per parola e chiedere all'intervistato/a di rispondere in un modo che sia il più vicino ai suoi pensieri sulla sua salute oggi.*

---

#### **INTRODUZIONE**

*(Nota per l'intervistatore/intervistatrice: legga quanto segue all'intervistato/a.)*



1  
2  
3  
4  
5 **Desideriamo conoscere ciò che pensa della sua salute. Le spiegherò cosa fare man mano che procedo,**  
6 **ma mi interrompa pure nel caso in cui non dovesse comprendere qualcosa o ritenesse che qualcosa**  
7 **non le fosse chiaro. Non ci sono risposte giuste o sbagliate. Siamo interessati solo al suo personale**  
8 **punto di vista.**  
9

10  
11  
12 **Per prima cosa, leggerò alcune domande. Ogni domanda ha una scelta di cinque risposte. Mi dica**  
13 **quale risposta descrive meglio la sua salute OGGI.**  
14

15  
16  
17 **Non scelga più di una risposta per ogni gruppo di domande.**  
18

19  
20 *(Nota per l'intervistatore/intervistatrice: per prima cosa, legga tutte e cinque le opzioni per ogni domanda.*  
21 *Quindi, chieda all'intervistato/a di scegliere quella che pensa si applichi a se stesso/a. Ripeta la domanda*  
22 *e le opzioni se necessario. Contrassegni la casella appropriata sotto ciascun titolo. Potrebbe essere*  
23 *necessario ricordare regolarmente all'intervistato/a che l'intervallo di tempo è OGGI.)*  
24  
25  
26  
27  
28  
29  
30  
31  
32  
33  
34  
35  
36  
37  
38  
39  
40  
41  
42  
43  
44  
45  
46  
47  
48  
49  
50  
51  
52  
53  
54  
55  
56  
57  
58  
59  
60

1  
2  
3  
4 **SISTEMA DESCRITTIVO EQ-5D**  
5

6 **Per prima cosa, vorremmo chiederle della CAPACITÀ DI MOVIMENTO. Direbbe che:**  
7

- 8 1. Non ha difficoltà nel camminare   
9 2. Ha lievi difficoltà nel camminare   
10 3. Ha moderate difficoltà nel camminare   
11 4. Ha gravi difficoltà nel camminare   
12 5. Non è in grado di camminare   
13
- 

14  
15 **Quindi, vorremmo chiederle della CURA DELLA PERSONA. Direbbe che:**  
16

- 17 1. Non ha difficoltà nel lavarsi o vestirsi   
18 2. Ha lievi difficoltà nel lavarsi o vestirsi   
19 3. Ha moderate difficoltà nel lavarsi o vestirsi   
20 4. Ha gravi difficoltà nel lavarsi o vestirsi   
21 5. Non è in grado di lavarsi o vestirsi   
22
- 

23  
24 **Quindi, vorremmo chiederle delle ATTIVITÀ ABITUALI, per es. lavoro, studio, lavori**  
25 **domestici, attività familiari o di svago. Direbbe che:**  
26

- 27 1. Non ha difficoltà nello svolgimento delle attività abituali   
28 2. Ha lievi difficoltà nello svolgimento delle attività abituali   
29 3. Ha moderate difficoltà nello svolgimento delle attività abituali   
30 4. Ha gravi difficoltà nello svolgimento delle attività abituali   
31 5. Non è in grado di svolgere le attività abituali   
32
- 

33  
34 **Quindi, vorremmo chiederle quanto DOLORE O FASTIDIO prova. Direbbe che:**  
35

- 36 1. Non prova alcun dolore o fastidio   
37 2. Prova lieve dolore o fastidio   
38 3. Prova moderato dolore o fastidio   
39 4. Prova grave dolore o fastidio   
40 5. Prova estremo dolore o fastidio   
41
- 

42  
43 **Infine, vorremmo chiederle dell'ANSIA O DEPRESSIONE. Direbbe che:**  
44

- 45 1. Non è ansioso/a o depresso/a   
46 2. È lievemente ansioso/a o depresso/a   
47 3. È moderatamente ansioso/a o depresso/a   
48 4. È gravemente ansioso/a o depresso/a   
49 5. È estremamente ansioso/a o depresso/a   
50
- 
- 51  
52  
53  
54  
55  
56  
57  
58  
59  
60

**EQ-5D VAS**

- Adesso, vorremmo sapere quanto è buona o cattiva la sua salute OGGI.
- Vorremmo che immaginasse una linea verticale numerata da 0 a 100.  
*(Nota per l'intervistatore/intervistatrice: in caso di intervista faccia a faccia, mostrare all'intervistato/a la linea VAS.)*
- 100 in cima alla linea rappresenta la migliore salute che può immaginare.
- 0 in fondo alla linea rappresenta la peggiore salute che può immaginare.
- Vorrei che ora mi indicasse un punto sulla linea per indicare com'è la sua salute OGGI.  
*(Nota per l'intervistatore/intervistatrice: contrassegni la linea nel punto che indica la salute dell'intervistato/a OGGI. Ora, scriva il numero indicato sulla linea nella casella sottostante.)*

LA SALUTE DELL'INTERVISTATO/A OGGI =

**Grazie per il tempo dedicato a rispondere a queste domande.**



**SPIROS (Standardized Protocol Items: Recommendations for Observational Studies) checklist**

| Section and topic                   | Description / sub-categories                                                                                                                                                                                        | Addressed in the manuscript (Paragraph name) |
|-------------------------------------|---------------------------------------------------------------------------------------------------------------------------------------------------------------------------------------------------------------------|----------------------------------------------|
| <b>i) General information</b>       |                                                                                                                                                                                                                     |                                              |
| Title                               | Descriptive title identifying study design                                                                                                                                                                          | Title page                                   |
| Protocol version                    | Version or amendment number and date and summary of changes                                                                                                                                                         | NA                                           |
| Protocol summary                    | Brief summary of protocol research                                                                                                                                                                                  | Abstract                                     |
| Sponsor and partner institute name  | Name of sponsor and participating institutes (if applicable)                                                                                                                                                        | Title page; Funding                          |
| Investigators name                  | Name of principal and co investigators.                                                                                                                                                                             | Title page                                   |
| Affiliations of investigators       | Affiliated institutions of investigators                                                                                                                                                                            | Title page                                   |
| Principal researcher contact detail | Name, email address, affiliation of Principal researcher for correspondence                                                                                                                                         | Title page                                   |
| Table of content                    | Table of content                                                                                                                                                                                                    | NA                                           |
| Page number                         | Page number on each page of protocol                                                                                                                                                                                | Yes                                          |
| List of abbreviations               | A detailed List of all abbreviations used in protocol with full form.                                                                                                                                               | List of abbreviations                        |
| <b>ii) Introduction</b>             |                                                                                                                                                                                                                     |                                              |
| Background of study                 | Scientific background of study                                                                                                                                                                                      | Background                                   |
| Review of prior research            | Summary of all previous relevant research                                                                                                                                                                           | Background                                   |
| Rationale of study                  | Justification for conducting the study                                                                                                                                                                              | Background                                   |
| Aim                                 | Broader aims and specific objectives of the study                                                                                                                                                                   | Study objectives                             |
| Objective of study                  | Primary and secondary objectives of study                                                                                                                                                                           | Study objectives                             |
| Prespecified hypothesis             | Prespecified null or alternative hypothesis                                                                                                                                                                         | NA                                           |
| <b>iii) Methods</b>                 |                                                                                                                                                                                                                     |                                              |
| Study design                        | Description of type/design of study                                                                                                                                                                                 | Study design                                 |
| Study setting                       | Description of setting, locations, relevant dates, including periods of recruitment/survey, exposure, follow-up, and data collection.<br><br>Schedule of study procedure – Figure or table                          | The Impella Network                          |
| Sample size                         | Estimated number, calculation and assumptions<br><br>Power calculation                                                                                                                                              | Sample size                                  |
| Sampling procedure                  | Description of sampling strategy to ensure representativeness and control of potential bias                                                                                                                         | Study population                             |
| Participants                        | <b>Cohort study</b> —eligibility criteria, and the sources and methods of selection of participants. Describe methods of follow-up. For matched studies, give matching criteria and number of exposed and unexposed | Study population                             |

|                                               |                                                                                                                                                                                                                                                                                                                                                                                                               |                                                                                               |
|-----------------------------------------------|---------------------------------------------------------------------------------------------------------------------------------------------------------------------------------------------------------------------------------------------------------------------------------------------------------------------------------------------------------------------------------------------------------------|-----------------------------------------------------------------------------------------------|
|                                               | <p><b>Case-control study</b>—Give the eligibility criteria, and the sources and methods of case ascertainment and control selection. Give the rationale for the choice of cases and controls. For matched studies, give matching criteria and the number of controls per case</p> <p><b>Cross-sectional study</b>—Give the eligibility criteria, and the sources and methods of selection of participants</p> |                                                                                               |
| Variables                                     | <ul style="list-style-type: none"> <li>• All outcomes</li> <li>• Exposures- definition of exposure of interest,</li> <li>• Predictors</li> <li>• Potential confounders</li> <li>• Effect modifiers</li> </ul>                                                                                                                                                                                                 | Outcomes of interest (Clinical parameters; Healthcare resource use and cost; Quality of life) |
| Data Sources/Measurement                      | <ul style="list-style-type: none"> <li>• For each variable of interest, give sources of data and details of methods of assessment (measurement).</li> <li>• Describe comparability of assessment methods if there is more than one group</li> <li>• Data collection points table</li> <li>• Blinding procedure</li> </ul>                                                                                     | Supplementary material                                                                        |
| Bias                                          | <p>Describe any efforts to address potential sources of bias. More specifically:</p> <ul style="list-style-type: none"> <li>• Information bias</li> <li>• Selection Bias</li> <li>• Control for confounding</li> </ul>                                                                                                                                                                                        | NA                                                                                            |
| Statistical analysis plan                     | <ul style="list-style-type: none"> <li>• Method of primary / secondary outcomes and additional analysis</li> <li>• Handling of missing data</li> <li>• Post-hoc analysis</li> </ul>                                                                                                                                                                                                                           | Data analysis (Statistical analysis; Cost-effectiveness analysis; Budget impact analysis)     |
| Handling of withdrawals and lost to follow up | Describe the procedures to be followed when a participant ceases participation in the study prematurely or is lost to follow up                                                                                                                                                                                                                                                                               | NA                                                                                            |
| Replacements                                  | Provide information on whether or not participants who discontinue the study will be replaced via additional recruitment to maintain the required sample size.                                                                                                                                                                                                                                                | NA                                                                                            |
| Outcome                                       | Define and describe all primary and secondary outcome or lost to follow up                                                                                                                                                                                                                                                                                                                                    | Outcomes of interest (Clinical parameters; Healthcare resource use and cost; Quality of life) |
| Database management                           | <p>Detail plan of database management including:</p> <ul style="list-style-type: none"> <li>• Data collection (electronic or paper based),</li> <li>• Source data</li> <li>• Data entry</li> <li>• Data editing</li> <li>• Coding</li> <li>• Data storage</li> </ul>                                                                                                                                          | Data collection and management                                                                |

|                                                  |                                                                                                                                                              |                                                          |
|--------------------------------------------------|--------------------------------------------------------------------------------------------------------------------------------------------------------------|----------------------------------------------------------|
|                                                  | <ul style="list-style-type: none"> <li>• Record retention</li> <li>• Data confidentiality</li> </ul>                                                         |                                                          |
| Validation of instrument                         | Reliability / validity of instrument or plan to establish validation                                                                                         | NA                                                       |
| Follow up                                        | Plan of follow up and addressing lost to follow up                                                                                                           | Study design                                             |
| Quality control                                  | <ul style="list-style-type: none"> <li>• Method of quality control</li> <li>• Monitoring (internal and external)</li> <li>• Training of surveyors</li> </ul> | NA                                                       |
| Quality assurance                                | Plan of quality assurance                                                                                                                                    | NA                                                       |
| Expected outcome / results                       | A brief description of expected outcome or results                                                                                                           | NA                                                       |
| <b>iv) Ethical consideration</b>                 |                                                                                                                                                              |                                                          |
| Ethical approval                                 | Whether it has been obtained and name of ethical committees. If approval not sought, Reason                                                                  | Ethics and dissemination                                 |
| Agreement and consent                            | Method of taking consent. Reason if consent not sought                                                                                                       | Patient and public involvement; Ethics and dissemination |
| Risk / Harm to participants                      | Any potential risk or harm to study participants                                                                                                             | NA                                                       |
| Adverse event and Severe adverse event reporting | Outline how Adverse Event and Severe adverse event information will be collected.                                                                            | NA                                                       |
| <b>v) Reporting and dissemination</b>            |                                                                                                                                                              |                                                          |
| Protocol amendments                              | Methods of communicating to investigators/IRBs and documenting                                                                                               | Study design                                             |
| Dissemination                                    | How results will be disseminated to participants, practitioners, public                                                                                      | Ethics and dissemination                                 |
| Publication Plan                                 | Who has right to publish; restrictions; authorship guidelines<br>Open Access                                                                                 | Ethics and dissemination                                 |
| Reporting of early stopping                      | Dissemination of results if trial is stopped early (for any reason)                                                                                          | NA                                                       |
| <b>vi) Others</b>                                |                                                                                                                                                              |                                                          |
| Limitations                                      | Limitations of proposed study, including risk of bias                                                                                                        | Strengths and limitations of this study                  |
| Strength of study                                | Highlight strengths of proposed study                                                                                                                        | Strengths and limitations of this study                  |
| References                                       | List of references cited in protocol                                                                                                                         | References                                               |
| Data collection forms                            | Summary table of all forms used for data collection at each point of study                                                                                   | Supplementary materials                                  |
| Inform consent forms                             | Sample of informed consent form, translated into local language                                                                                              | NA                                                       |
| Funding                                          | Source of funding and the role of the funders for the present study                                                                                          | Funding                                                  |
| Acknowledgement for protocol development         | Acknowledgement of persons involved in protocol preparation                                                                                                  | Acknowledgements                                         |
| Data sharing policy                              | To describe how data will be made available in public domain.                                                                                                |                                                          |
| Contributions of authors to protocol             | Listed authors should have participated sufficiently in preparation of protocol with details of their contribution.                                          | Authors contribution                                     |
| Trial registry                                   | For observational studies also registered as trial                                                                                                           | NA                                                       |
| Annexures                                        | Data collection form /instruments                                                                                                                            | Supplementary materials                                  |

1  
2  
3  
4  
5  
6  
7  
8  
9  
10  
11  
12  
13  
14  
15  
16  
17  
18  
19  
20  
21  
22  
23  
24  
25  
26  
27  
28  
29  
30  
31  
32  
33  
34  
35  
36  
37  
38  
39  
40  
41  
42  
43  
44  
45  
46  
47  
48  
49  
50  
51  
52  
53  
54  
55  
56  
57  
58  
59  
60

|  |                                                                                                              |  |
|--|--------------------------------------------------------------------------------------------------------------|--|
|  | Informed consent form<br>Standard operating procedures (SOPs)<br>Detailed Statistical analysis plan<br>(SAP) |  |
|--|--------------------------------------------------------------------------------------------------------------|--|

For peer review only
